# Supplementary material for: Development of a new approach for the synthesis of (+)-15-deoxy-Δ12,14-prostaglandin J2 methyl ester based on the [2+2]-cycloadduct of 5-trimethylsilylcyclopentadiene and dichloroketene
Source: Royal Society of Chemistry journal article supplement (doi:10.1039/d2nj01003h), 2022-01-01
Supplement: d2nj01003h1.pdf [file d2nj01003h1.pdf]

## New Journal of Chemistry

### Supporting Information

#### **Development of a new approach for synthesis of (+)-15-deoxy- $\Delta^{12,14}$ -prostaglandin J<sub>2</sub> methyl ester based on [2+2]-cycloadduct of 5-trimethylsilylcyclopentadiene and dichloroketene**

*Airat M. Gimazetdinov\**, Aidar Z. Al'mukhametov, Mansur S. Miftakhov

---

\* Corresponding author. Tel.: +7-347-235-58-47; e-mail: airopet@yandex.ru

## Contents

|                                                                                      |     |
|--------------------------------------------------------------------------------------|-----|
| 1. General Information .....                                                         | S4  |
| 2. Experimental Procedures. ....                                                     | S5  |
| Compound 9.....                                                                      | S5  |
| Compound 10.....                                                                     | S5  |
| Compound 11.....                                                                     | S6  |
| Compound 12.....                                                                     | S7  |
| Compounds 13 . ....                                                                  | S8  |
| Compounds 14 and 15.....                                                             | S9  |
| Compounds 25 and 20.....                                                             | S11 |
| Compound 23.....                                                                     | S12 |
| Compounds 24 and 27.....                                                             | S13 |
| Compound 28.....                                                                     | S14 |
| Compounds 29 and 30.....                                                             | S15 |
| Compound 31.....                                                                     | S16 |
| Compounds 32 and 33.....                                                             | S17 |
| Compound 34.....                                                                     | S19 |
| Compound 35.....                                                                     | S20 |
| Compound 36.....                                                                     | S21 |
| Compound 2.....                                                                      | S22 |
| 3. NMR Spectra of New Compounds. ....                                                | S23 |
| Figure. S1 <sup>1</sup> H NMR spectrum of 24 ( <i>d</i> -acetone, 500 MHz) .....     | S23 |
| Figure. S2 <sup>13</sup> C NMR spectrum of 24 ( <i>d</i> -acetone, 125.77 MHz) ..... | S24 |
| Figure. S3 <sup>1</sup> H NMR spectrum of 27 ( <i>d</i> -acetone, 500 MHz) .....     | S25 |

|                                                                                                      |     |
|------------------------------------------------------------------------------------------------------|-----|
| Figure. S4 $^{13}\text{C}$ NMR spectrum of 27 ( <i>d</i> -acetone, 125.77 MHz) .....                 | S26 |
| Figure. S5 $^1\text{H}$ NMR spectrum of 28 ( <i>d</i> -acetone, 500 MHz) .....                       | S27 |
| Figure. S6 $^{13}\text{C}$ NMR spectrum of 28 ( <i>d</i> -acetone, 125.77 MHz) .....                 | S28 |
| Figure. S7 $^1\text{H}$ NMR spectrum of 29 ( <i>d</i> -acetone, 500 MHz) .....                       | S29 |
| Figure. S8 $^{13}\text{C}$ NMR spectrum of 29 ( <i>d</i> -acetone, 125.77 MHz) .....                 | S30 |
| Figure. S9 $^1\text{H}$ NMR spectrum of 30 ( <i>d</i> -acetone, 500 MHz) .....                       | S31 |
| Figure. S10 $^{13}\text{C}$ NMR spectrum of 30 ( <i>d</i> -acetone, 125.77 MHz) .....                | S32 |
| Figure. S11 $^1\text{H}$ NMR spectrum of 31 ( <i>d</i> -acetone, 500 MHz) .....                      | S33 |
| Figure. S12 $^{13}\text{C}$ NMR spectrum of 31 ( <i>d</i> -acetone, 125.77 MHz) .....                | S34 |
| Figure. S13 $^1\text{H}$ NMR spectrum of 32 ( <i>d</i> -acetone, 500 MHz) .....                      | S35 |
| Figure. S14 $^{13}\text{C}$ NMR spectrum of 32 ( <i>d</i> -acetone, 500 MHz) .....                   | S36 |
| Figure. S15 $^1\text{H}$ NMR spectrum of 33 ( <i>d</i> -acetone, 500 MHz) .....                      | S37 |
| Figure. S16 $^{13}\text{C}$ NMR spectrum of 33 ( <i>d</i> -acetone, 125.77 MHz) .....                | S38 |
| Figure. S17 $\{^1\text{H}, ^1\text{H}\}$ NOESY spectrum of 33 ( <i>d</i> -acetone, 125.77 MHz) ..... | S39 |
| Figure. S18 $^1\text{H}$ NMR spectrum of 34 ( <i>d</i> -acetone, 500 MHz) .....                      | S40 |
| Figure. S19 $^{13}\text{C}$ NMR spectrum of 34 ( <i>d</i> -acetone, 125.77 MHz) .....                | S41 |
| Figure. S20 $^1\text{H}$ NMR spectrum of 35 ( <i>d</i> -acetone, 500 MHz) .....                      | S42 |
| Figure. S21 $^{13}\text{C}$ NMR spectrum of 35 ( <i>d</i> -acetone, 125.77 MHz) .....                | S43 |
| Figure. S22 $^{13}\text{C}$ NMR spectrum of 35 ( <i>d</i> -acetone, 125.77 MHz) .....                | S44 |
| Figure. S23 $^1\text{H}$ NMR spectrum of 36 ( <i>d</i> -acetone, 500 MHz) .....                      | S45 |
| Figure. S24 $^{13}\text{C}$ NMR spectrum of 36 ( <i>d</i> -acetone, 125.77 MHz) .....                | S46 |
| Figure. S25 $^1\text{H}$ NMR spectrum of 2 ( <i>d</i> -acetone, 500 MHz) .....                       | S47 |
| Figure. S26 $^{13}\text{C}$ NMR spectrum of 2 ( <i>d</i> -acetone, 125.77 MHz) .....                 | S48 |

## 1. General Information

**Experimental.** Solvents were purified and dried by standard procedures before use. Reagents were generally the best quality commercial grade and used without further purification unless otherwise indicated. All reactions were carried out in oven-dried glassware. Air- and moisture-sensitive liquids and solutions were transferred by syringe. Reactions were stirred using Teflon-coated magnetic stir bars. Elevated temperatures were maintained using thermostat-controlled heating block. Organic solutions were concentrated using a rotary evaporator with a diaphragm vacuum pump. TLC was performed using Sorbfil STC-1A 110  $\mu\text{m}$  layer, silica gel 5-17 precoated foil plates. The TLC plates were visualized by phosphomolybdic acid or anisaldehyde. Column chromatography was conducted using 210–280 mesh silica gel.

**Analytical.** Optical rotations were measured using the sodium D line at 589 nm on a Perkin–Elmer, Model 241 MC polarimeter at 20 °C. IR (infrared spectra) were recorded on a Shimadzu IR Prestige-21 spectrometer as nujol mull or as neat thin films on KBr plates (film) and were reported in reciprocal centimeters ( $\text{cm}^{-1}$ ).  $^1\text{H}$  NMR spectra were obtained using a Bruker AM-300 (300 MHz for  $^1\text{H}$  and 75.47 MHz for  $^{13}\text{C}$ ) as solutions in *d*-acetone (Aldrich Chemical Company; spectra grade). DEPT135 spectra accompanied with the normal  $^{13}\text{C}$  NMR were obtained using a BrukerAvance III (500 MHz for  $^1\text{H}$  and 125.77 MHz for  $^{13}\text{C}$ ) as solutions in *d*-acetone (Aldrich Chemical Company; spectra grade) or *d*-chloroform (Aldrich Chemical Company; spectra grade). Chemical shifts are reported in  $\delta$  unit-parts per million (ppm) downfield from tetramethylsilane (TMS), chloroform or acetone as the internal reference. Splitting patterns are designated as s, singlet; br s, broad singlet; d, doublet; t, triplet; q, quartet; quint., quintet. Mass spectra were recorded on Shimadzu LCMS QP-2010EV (APCI) spectrometer. Elemental analyses were carried on a Euro EA 3000 CHNS-analyzer.

**Abbreviations.** DIBAL-H = diisobutyl aluminium hydride, DCM = dichloromethane,  $\text{Et}_2\text{O}$  = ethyl ether, DIPEA = *N,N*-diisopropylethylamine,  $\text{Ac}_2\text{O}$  = acetic anhydride, THF = tetrahydrofuran, EA = ethyl acetate, PE = petroleum ether,  $\text{PPh}_3$  = triphenylphosphine, TBAF = tetrabutylammonium fluoride, MeOH = methanol, DMSO = dimethyl sulfoxide, DBU = 1,8-diazabicyclo[5.4.0]undec-7-ene, TBS = *tert*-butyldimethylsilyl, MOM = methoxymethyl, Oxone® = the triple salt  $2\text{KHSO}_5 \cdot \text{KHSO}_4 \cdot \text{K}_2\text{SO}_4$ , *n*-BuLi = *n*-butyllithium, TFA = trifluoroacetic acid, Py = pyridine, MeCN = acetonitrile.

## 2. Experimental Procedures

### Total Synthesis of (+)-15-Deoxy- $\Delta^{12,14}$ -Prostaglandin J<sub>2</sub> Methyl Ester

#### Compound 9

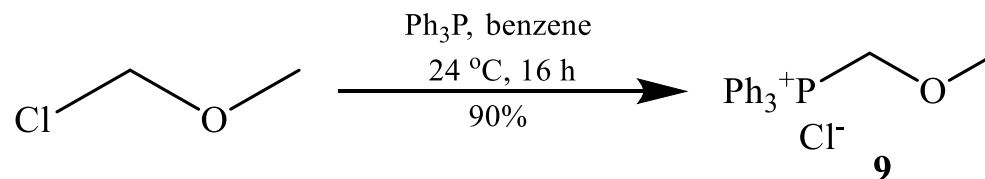

A solution of MOM chloride (3 mL, 0.04 mmol) in benzene (15 mL) was added dropwise in period over 15 min to a 250 mL round-bottom flask containing PPh<sub>3</sub> (10.74 g, 0.04 mmol) and benzene (100 mL) at rt under an argon atmosphere. The reaction mixture was stirred at the same temperature for 24 h and filtered on Schott® funnel. The residue on the filter was washed with three 10-ml. portions of benzene and evaporated under vacuum to afford *title compound* as a white crystalline solid (11.3 g, 90% yield). M.p.=200-202 °C;  $\delta_{\text{H}}$  (300 MHz, *d*-chloroform/chloroform): 7.95-7.61 (m, 15H, 3Ph), 5.96 (d, *J* 3.9 Hz, 2H, CH<sub>2</sub>), 3.68 (s, 3H, CH<sub>3</sub>).

#### Compound 10

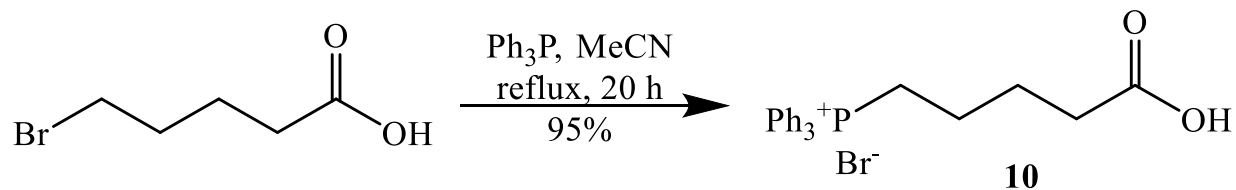

A solution of 5-bromopentanoic acid (6 g, 0.03 mmol) in MeCN (15 mL) was added to a 250 mL round-bottom flask containing PPh<sub>3</sub> (8.9 g, 0.03 mmol) and MeCN (100 mL) at rt under an argon atmosphere. The reaction mixture was stirred at reflux, cooled to rt and most of the solvent was evaporated under reducer pressure. The light beige crystalline residue was filtered on Schott® funnel, washed with three 10-ml. portions of Et<sub>2</sub>O and evaporated under vacuum to afford *title compound* as a light-beige crystalline solid (12.9 g, 95% yield). M.p.=205-207 °C;  $\delta_{\text{H}}$  (300 MHz, *d*-chloroform/chloroform): 11.87 (br.s, 1H, CO<sub>2</sub>H), 7.98-7.65 (m, 15H, 3Ph), 3.71-3.58 (m, 2H, C<sup>1</sup>H), 2.74 (t, *J* 6.8 Hz, 2H, C<sup>4</sup>H), 1.96 (quint, *J* 6.7 Hz, 2H, C<sup>3</sup>H), 1.85-1.64 (m, 2H, C<sup>2</sup>H).

## Compound 11

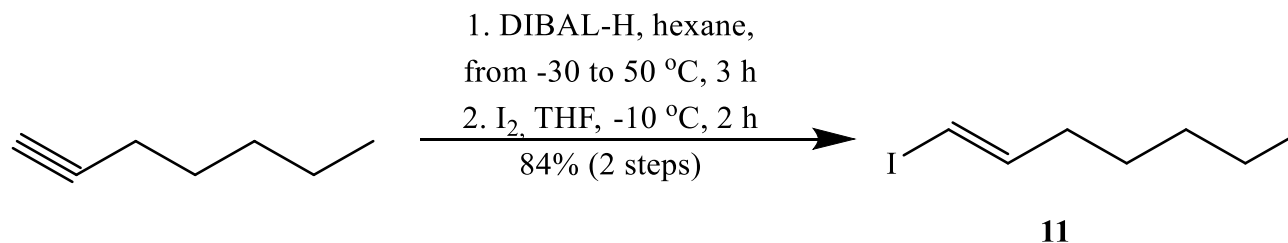

*Step 1:* To a solution of 1-heptyne (3g, 0.03 mole) in *n*-hexane (20 mL) was added *via* syringe DIBAL-H (8.7 mL, 0.1 mole) while maintaining the temperature below 40°. When the initial exothermic reaction had subsided, the reaction mixture was heated for 2 hr at 50 °C. Then the heptane was removed under reduced pressure (0.5 mm).

*Step 2:* The aforementioned residue was diluted with 40 ml of THF. To this vinylalane solution at -50 °C was added iodine (2.54 g, 0.1 mole) in THF (40 mL). After allowing the reaction mixture to warm up to rt, the diisobutylalane (-Al(C<sub>4</sub>H<sub>8</sub>)<sub>2</sub>) was decomposed at 20-30 °C by dropwise addition of 20% sulfuric acid (exothermic reaction). When the isobutane evolution had diminished, the reaction mixture was poured into ice-20 % H<sub>2</sub>SO<sub>4</sub>. The vinyl iodide was extracted into hexane (3x20 mL) and the combined extracts were washed first with sodium thiosulfate, then with sodium bicarbonate. The residue was purified by column chromatography (100:1 PE/EA as eluent) to afford *title compound* as a transparent yellowish liquid (5.6 g, 84% yield over two steps). R<sub>f</sub> (petroleum ether/ethyl acetate = 100:1) 0.7;  $\delta_{\text{H}}$  (300 MHz, *d*-chloroform/chloroform): 6.56-6.47 (m, 1H, C<sup>2</sup>H), 6.0 (d, *J* 14.2 Hz, 1H, C<sup>1</sup>H), 2.06 (q, *J* 7.0 Hz, 2H, C<sup>3</sup>H), 1.47-1.24 (m, 6H, C<sup>4</sup>H, C<sup>5</sup>H and C<sup>6</sup>H), 0.91 (t, *J* 6.9 Hz, 3H, CH<sub>3</sub>).

## Compound 12

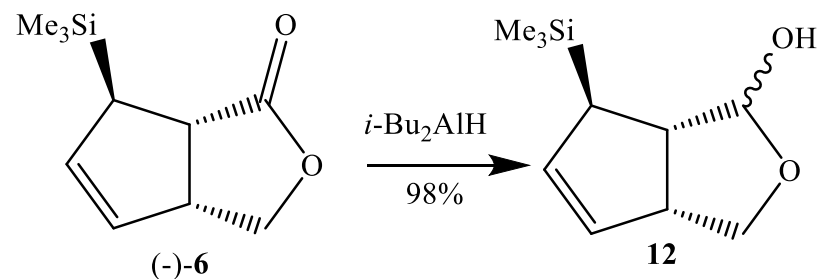

To a stirred solution of 0.5 g (2.5 mmol) **(-)-6** in absolute  $\text{CH}_2\text{Cl}_2$  (30 mL) at  $-78^\circ\text{C}$  was added dropwise 0.9 g (6.3 mmol) DIBAL-H in absolute  $\text{CH}_2\text{Cl}_2$  (10 mL). The reaction was monitored by TLC (petroleum ether/ethyl acetate, 1:1). After stirring for 1 h at the same temperature the reaction mixture was warmed up to  $0^\circ\text{C}$  and 10 mL sat.  $\text{NH}_4\text{Cl}$  was added. The resulting mixture was filtered, evaporated under reduced pressure and extracted 3x30 mL EtOAc. The combined organic layers dried over  $\text{MgSO}_4$  and evaporated. Purification of products by column chromatography (petroleum ether/ethyl acetate, 1:1) afforded of *title compound* (0.48 g, 98%) as a white crystalline solid; m.p.  $54\text{--}56^\circ\text{C}$ ; [Found: C, 60.44; H, 8.86.  $\text{C}_{10}\text{H}_{18}\text{O}_2\text{Si}$  requires C, 60.60; H, 9.09%];  $R_f$  (petroleum ether/ethyl acetate, 3:1) 0.3; IR (liquid film)  $\nu_{\text{max}}$ ,  $\text{cm}^{-1}$ : 3390, 2953, 2921, 1246, 964, 841;  $\delta_{\text{H}}$  (300 MHz, *d*-chloroform/chloroform): 5.61–5.64 (m, 1H,  $\text{C}^5\text{H}$ ), 5.39–5.42 (m, 1H,  $\text{C}^4\text{H}$ ), 5.09 (s, 1H,  $\text{C}^1\text{H}$ ), 3.89 (dd,  $J$  8.2, 6.6 Hz, 1H,  $\text{C}^3\text{H}$ ), 3.71 (dd,  $J$  13.0, 9.4 Hz, 1H,  $\text{C}^3\text{H}$ ), 3.35–3.39 (m, 1H,  $\text{C}^{3a}\text{H}$ ), 2.62 (dd,  $J$  8.1, 3.2 Hz, 1H,  $\text{C}^{6a}\text{H}$ ), 1.91 (t,  $J$  2.5 Hz, 1H,  $\text{C}^6\text{H}$ ), 1.67–1.74 (br s, 1H, OH), -0.03 (s, 9H,  $(\text{CH}_3)_3\text{Si}$ );  $\delta_{\text{C}}$  (75.1 MHz, *d*-chloroform/chloroform): 132.58 ( $\text{C}^5$ ), 128.49 ( $\text{C}^4$ ), 107.74 ( $\text{C}^1$ ), 70.32 ( $\text{C}^3$ ), 50.73 ( $\text{C}^{3a}$ ), 49.86 ( $\text{C}^{6a}$ ), 40.47 ( $\text{C}^6$ ), -3.45 ( $(\text{CH}_3)_3\text{Si}$ );  $m/z$  (APCI): 199 (100%,  $[\text{MH}]^+$ ).

### Compound 13

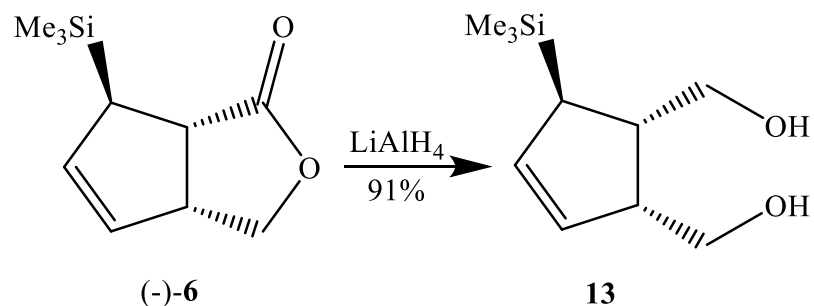

a. To a stirred solution of 2.1 g (10.7 mmol) (-)-6 in anhydrous THF (70 mL) at 0°C was added 1.2 g (31.5 mmol)  $\text{LiAlH}_4$ . The reaction was monitored by TLC (petroleum ether/ethyl acetate, 1:1). After stirring for 1 h at 0°C to the solution was added 20 mL sat.  $\text{NH}_4\text{Cl}$  and resulting mixture was filtered, evaporated under reduced pressure and extracted 3x50 mL EtOAc. The combined organic layers dried over  $\text{MgSO}_4$  and evaporated under reduced pressure. Purification of products by column chromatography (petroleum ether/ethyl acetate, 1:1) afforded of *title compound* (1.95 g, 91%) as a light brown oil.

b. To a stirred solution of 0.25 g (0.8 mmol) **14** (or **15**) in  $\text{CH}_3\text{OH}$  (25 mL) at rt was added 0.9 g Dowex®. The reaction was monitored by TLC (petroleum ether/ethyl acetate, 1:1) and after 3 h stirring the ion-exchanged resin was removed by filtration through a short pad of Celite and washed with EtOAc (3x15 mL). The filtrate was concentrated under reduced pressure and the residue was purified by column chromatography on silica gel (petroleum ether/ethyl acetate, 1:1) to furnish *title compound* (0.16 g, 98%) as a light brown oil. [Found: C, 59.74; H, 9.86.  $\text{C}_{10}\text{H}_{20}\text{O}_2\text{Si}$  requires C, 59.91; H, 9.98%];  $R_f$  (petroleum ether/ethyl acetate, 1:1) 0.3;  $[\alpha]_D^{20} -103.4$  ( $c$  0.98,  $\text{CH}_2\text{Cl}_2$ ); IR (liquid film)  $\nu_{\text{max}}$ ,  $\text{cm}^{-1}$ : 3310, 1248, 1051, 837, 728;  $\delta_{\text{H}}$  (300MHz,  $d$ -chloroform/chloroform): 5.68-5.72 (m, 1H,  $\text{C}^4\text{H}$  or  $\text{C}^3\text{H}$ ), 5.31-5.35 (m, 1H,  $\text{C}^3\text{H}$  or  $\text{C}^4\text{H}$ ), 3.55-3.81 (m, 6H,  $2\text{CH}_2\text{OH}$ ), 3.01-3.12 (m, 1H,  $\text{C}^2\text{H}$ ), 2.55-2.64 (m, 1H,  $\text{C}^1\text{H}$ ), 1.54-1.60 (m, 1H,  $\text{C}^5\text{H}$ ), 0.0 (s, 9H,  $(\text{CH}_3)_3\text{Si}$ );  $\delta_{\text{C}}$  (75.1 MHz,  $d$ -chloroform/chloroform): 133.35 ( $\text{C}^3$ ), 130.68 ( $\text{C}^4$ ), 62.93 ( $\text{CH}_2\text{O}$ ), 61.70 ( $\text{CH}_2\text{O}$ ), 49.38 ( $\text{C}^2$ ), 42.21 ( $\text{C}^1$ ), 34.31 ( $\text{C}^5$ ), 1.90 ( $(\text{CH}_3)_3\text{Si}$ );  $m/z$  (APCI) 201 (100%,  $[\text{MH}]^+$ ).

## Compounds 14 and 15

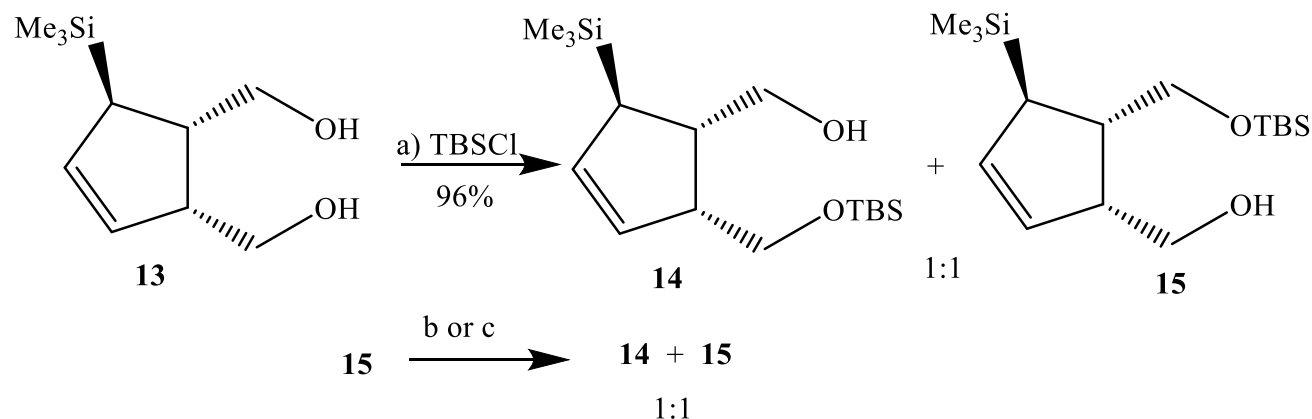

b)  $\text{CHCl}_3$ , rt, 30 h, quant; c) NaH, THF, 0 °C, 30 min, 95%.

*a.* A solution of 1.5 g (7.5 mmol) of diol **13** in methylene chloride (80 mL) was added under stirring to a mixture of 1.24 g (8.25 mmol) of *tert*-butyl(chloro)dimethylsilane, 0.56 g (8.25 mmol) of imidazole and 30 mL of methylene chloride at 0°C. The mixture was stirred for 3 h at the same temperature (monitored by TLC) and evaporated under reduced pressure. Purification of the product by column chromatography (petroleum ether/ethyl acetate, 10:1) afforded individual *title compounds*.

**Compound 14.** Yield 1.13 g (48%), transparent viscous oil; [Found: C, 60.88; H, 10.56.  $\text{C}_{16}\text{H}_{34}\text{O}_2\text{Si}_2$  requires C, 61.03; H, 10.81%];  $R_f$  (petroleum ether/ethyl acetate, 10:1) 0.4;  $[\alpha]_D^{20}$  -106.4 (*c* 1.03,  $\text{CH}_2\text{Cl}_2$ ); IR (liquid film)  $\nu_{\text{max}}$ ,  $\text{cm}^{-1}$ : 3456, 2955, 2873, 1472, 1464, 1249, 1061, 841, 832, 778;  $\delta_{\text{H}}$  (500 MHz,  $(\text{CD}_3)_2\text{CO}$ ): 5.70 (dt, *J* 5.3, 2.3 Hz, 1H,  $\text{C}^3\text{H}$ ), 5.48 (dt, *J* 5.8, 2.3 Hz, 1H,  $\text{C}^4\text{H}$ ), 4.09-4.12 (br. s, 1H, OH), 3.78 (dd, *J* 10.3, 7.7 Hz, 1H,  $\text{CH}_2\text{-OH}$ ), 3.67 (dd, *J* 10.3, 5.8 Hz, 1H,  $\text{CH}_2\text{-OH}$ ), 3.62-3.65 (m, 2H,  $\text{CH}_2\text{-OSi}$ ), 2.92-3.01 (m, 1H,  $\text{C}^2\text{H}$ ), 2.46-2.53 (m, 1H,  $\text{C}^1\text{H}$ ), 1.78 (dt, *J* 5.0, 2.3 Hz, 1H,  $\text{C}^5\text{H}$ ), 0.91 (s, 9H,  $(\text{CH}_3)_3\text{C}$ ), 0.10 (s, 6H,  $(\text{CH}_3)_2\text{Si}$ ), 0.0 (s, 9H,  $(\text{CH}_3)_3\text{Si}$ );  $\delta_{\text{C}}$  (125.77 MHz,  $(\text{CD}_3)_2\text{CO}$ ): 132.42 ( $\text{C}^4$ ), 127.17 ( $\text{C}^3$ ), 62.76 ( $\text{CH}_2\text{OH}$ ), 62.62 ( $\text{CH}_2\text{OSi}$ ), 50.63 ( $\text{C}^2$ ), 44.33 ( $\text{C}^1$ ), 37.63 ( $\text{C}^5$ ), 25.37 ( $(\text{CH}_3)_3\text{C}$ ), 18.21 ( $(\text{CH}_3)_3\text{C}$ ), -3.57 ( $(\text{CH}_3)_3\text{Si}$ ), -6.12 ( $(\text{CH}_3)_2\text{Si}$ ); *m/z* (APCI): 315 (100%,  $[\text{MH}]^+$ ).

**Compound 15.** Yield 1.11 g (47%), transparent viscous oil; [Found: C, 60.94; H, 10.65.  $\text{C}_{16}\text{H}_{34}\text{O}_2\text{Si}_2$  requires C, 61.03; H, 10.81%];  $R_f$  (petroleum ether/ethyl acetate, 10:1) 0.3;  $[\alpha]_D^{20}$  -118.6 (*c* 1.17,  $\text{CH}_2\text{Cl}_2$ ); IR (liquid film)  $\nu_{\text{max}}$ ,  $\text{cm}^{-1}$ : 3415, 2999, 2885, 1686, 1464, 1249, 836, 777;  $\delta_{\text{H}}$  (500 MHz,

(CD<sub>3</sub>)<sub>2</sub>CO): 5.69 (ddd, *J* 5.7, 3.6, 2.7 Hz, 1H, C<sup>2</sup>H), 5.46 (dt, *J* 5.7, 2.7 Hz, 1H, C<sup>3</sup>H), 4.09-4.12 (br. s, 1H, OH), 3.80 (dd, *J* 9.9, 7.8 Hz, 1H, CH<sub>2</sub>-OH), 3.65 (dd, *J* 10.1, 8.0 Hz, 1H, CH<sub>2</sub>-OSi), 3.54 (dd, *J* 10.1, 6.0 Hz, 1H, CH<sub>2</sub>-OSi), 3.49 (dd, *J* 9.9, 6.6 Hz, 1H, CH<sub>2</sub>-OH), 2.94 (dddd, *J* 7.8, 6.6, 6.0, 3.6 Hz, 1H, C<sup>1</sup>H), 2.50 (dtd, *J* 8.0, 6.0, 3.6 Hz, 1H, C<sup>5</sup>H), 1.80 (dt, *J* 5.6, 2.7 Hz, 1H, C<sup>4</sup>H), 0.91 (s, 9H, (CH<sub>3</sub>)<sub>3</sub>C), 0.10 (s, 6H, (CH<sub>3</sub>)<sub>2</sub>Si), 0.0 (9H, s, (CH<sub>3</sub>)<sub>3</sub>Si); δ<sub>C</sub> (125.77 MHz, (CD<sub>3</sub>)<sub>2</sub>CO): 131.84 (C<sup>3</sup>), 128.17 (C<sup>2</sup>), 63.51 (CH<sub>2</sub>OH), 61.60 (CH<sub>2</sub>OSi), 51.12 (C<sup>5</sup>), 43.73 (C<sup>1</sup>), 38.44 (C<sup>4</sup>), 25.44 ((CH<sub>3</sub>)<sub>3</sub>C), 17.86 ((CH<sub>3</sub>)<sub>3</sub>C), -3.60 ((CH<sub>3</sub>)<sub>3</sub>Si), -4.11 ((CH<sub>3</sub>)<sub>2</sub>Si); m/z (APCI): 315 (100%, [MH]<sup>+</sup>).

b. Compound **15** (0.2 g, 0.67 mmol) was dissolved in 15 ml of commercially available crude chloroform and resulting mixture was stirred for 30 min at rt. Organic solvent was evaporated under reduced pressure and purification of the product by column chromatography (petroleum ether/ethyl acetate, 10:1) afforded individual compounds **14** and **15** in 95% overall yield.

c. To a stirred under argon atmosphere suspension of NaH (34 mg, 1.2 mmol, 65% in oil) in dry THF (5 mL) at 0 °C was added compound **15** (0.3 g, 1 mmol) in dry THF (10 mL). The resulting mixture was stirred for 30 min at the same temperature and saturated solution of ammonium chloride (10 mL) was added. The reaction solution was extracted with ethyl acetate (3 × 20 mL), the extracts were dried (MgSO<sub>4</sub>), and evaporated under reduced pressure. Purification of the product by column chromatography (petroleum ether/ethyl acetate, 10:1) afforded individual *title compounds* in quantitative yield.

## Compounds 25 and 20.

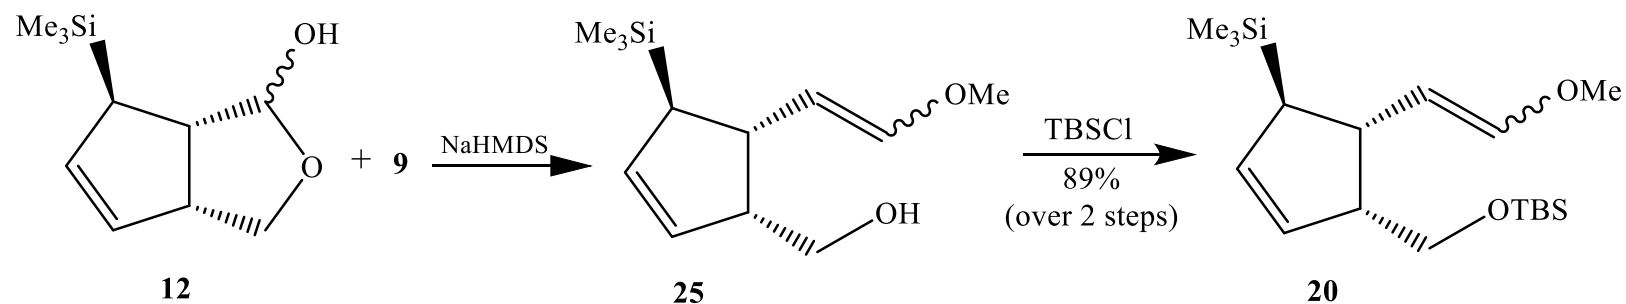

*Step 1:* To a stirred solution of methoxymethylidenetriphenylphosphonium chloride **9** (0.87 g, 2.54 mmol) in 20 ml of dry toluene, cooled to  $-78^\circ\text{C}$  under argon atmosphere, was added 1.2M solution of  $\text{NaHMDS}$  (1.85 mL, 2.22 mmol) and the temperature was heated to rt. After being stirred at rt for 10 min, the reaction solution was cooled at  $-78^\circ\text{C}$  and the solution of the lactole **12** (0.2 g, 1.01 mmol) in 5 mL of dry toluene was added. Then, the reaction mixture was heated to room temperature and 3 mL of saturated solution of  $\text{NH}_4\text{Cl}$  was added. The resulting mixture was filtered, water layer extracted with  $\text{EtOAc}$ , combined organic layers dried by  $\text{MgSO}_4$ , solvent evaporated. The crude enoether **25** was used further without purification.

*Step 2:* The aforementioned residue was diluted with 20 ml of  $\text{CH}_2\text{Cl}_2$  and the resulting mixture was added under stirring to a mixture of 0.22 g (1.5 mmol) of *tert*-butyl(chloro)dimethylsilane, 0.14 g (2.0 mmol) of imidazole and 15 mL of methylene chloride at rt. The mixture was stirred for 4 h at the same temperature (monitored by TLC) and evaporated under reduced pressure. Purification of the product by column chromatography (petroleum ether/ethyl acetate, 40:1) afforded individual *title compound* (0.30 g, 89%) as a colorless oily liquid. [Found: C, 63.26; H, 10.49.  $\text{C}_{18}\text{H}_{36}\text{O}_2\text{Si}_2$  requires C, 63.47; H, 10.65%];  $R_f$  (petroleum ether/ethyl acetate, 40:1) 0.5; IR (liquid film)  $\nu_{\text{max}}$ ,  $\text{cm}^{-1}$ : 3057, 2955, 2856, 1436, 1248, 1193, 1119, 836, 720;  $\delta_{\text{H}}$  (500 MHz,  $(\text{CD}_3)_2\text{CO}$ ): 6.36 (d,  $J$  12.6 Hz, 1H,  $\text{CH}=\text{CHOMe}$ ), 5.73 (dt,  $J$  2.6, 5.8 Hz, 1H,  $\text{C}^3\text{H}$ ), 5.59 (dt,  $J$  2.1, 5.6 Hz, 1H,  $\text{C}^2\text{H}$ ), 4.83 (dd,  $J$  10.2, 12.6 Hz, 1H,  $\text{CH}=\text{CHOMe}$ ), 3.66 (dd,  $J$  5.6, 9.8 Hz, 1H,  $\text{CH}_2\text{O}$ ), 3.56 (dd,  $J$  2.2, 9.6 Hz, 1H,  $\text{CH}_2\text{O}$ ), 3.46 (s, 3H,  $\text{CH}_3$ ), 2.85-2.89 (m, 1H,  $\text{C}^5\text{H}$ ), 2.71-2.77 (m, 1H,  $\text{C}^1\text{H}$ ), 1.90 (td,  $J$  2.5, 4.8 Hz, 1H,  $\text{C}^4\text{H}$ ), 0.88 (s, 9H,  $(\text{CH}_3)_3\text{C}$ ), 0.03 (s, 6H,  $(\text{CH}_3)_2\text{Si}$ ), -0.01 (s, 9H,  $(\text{CH}_3)_3\text{Si}$ );  $\delta_{\text{C}}$  (125.77 MHz,  $(\text{CD}_3)_2\text{CO}$ ): 146.83 ( $\text{CH}=\text{CHOMe}$ ), 133.43 ( $\text{C}^2$ ), 131.78 ( $\text{C}^3$ ), 104.62 ( $\text{CH}=\text{CHOMe}$ ), 63.65 ( $\text{CH}_2\text{O}$ ), 55.03 ( $\text{CH}_3$ ), 52.31 ( $\text{C}^1$ ), 43.39 ( $\text{C}^5$ ), 41.12 ( $\text{C}^4$ ), 25.39 ( $(\text{CH}_3)_3\text{C}$ ), 17.88 ( $(\text{CH}_3)_3\text{C}$ ), -3.59 ( $(\text{CH}_3)_3\text{Si}$ ), -6.0 ( $(\text{CH}_3)_2\text{Si}$ );  $m/z$  (APCI): 341 (100%,  $[\text{MH}]^+$ ).

### Compound 23.

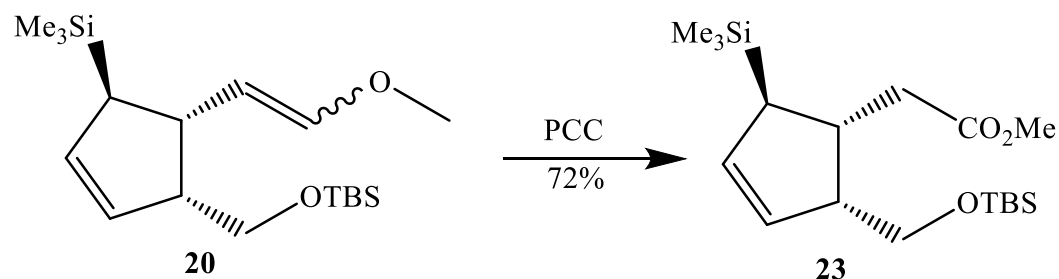

To the solution of enolether **20** (0.89 g, 2.60 mmol) in dry  $\text{CH}_2\text{Cl}_2$  at 0 °C, were added  $\text{SiO}_2$  (0.89 g),  $\text{NaHCO}_3$  (0.17 g, 10 %mass of PCC) and PCC (1.69 g, 7.83 mmol). Then, reaction mass warmed to room temperature and stirred for 2 h (control by TLC). The mixture was filtered throughout the Schott filter with  $\text{SiO}_2$ , the solvent evaporated. Purification of the product by column chromatography with  $\text{SiO}_2$  gave *title compound* (0.64 g, 69%) as a transparent viscous oil; [Found: C, 60.49; H, 10.09.  $\text{C}_{18}\text{H}_{36}\text{O}_3\text{Si}_2$  requires C, 60.62; H, 10.17%];  $R_f$  (petroleum ether/ethyl acetate, 20:1) 0.5;  $[\alpha]_D^{20}$ : +141.0 ( $c$  1.0,  $\text{CH}_2\text{Cl}_2$ ); IR (liquid film)  $\nu_{\text{max}}$ ,  $\text{cm}^{-1}$ : 2954, 2857, 1739, 1249, 1094, 837, 775;  $\delta_{\text{H}}$  (500 MHz,  $(\text{CD}_3)_2\text{CO}$ ): 5.73 (dt,  $J$  2.6, 5.7 Hz, 1H,  $\text{C}^4\text{H}$ ), 5.45 (dt,  $J$  2.0, 5.7 Hz, 1H,  $\text{C}^3\text{H}$ ), 3.70 (dd,  $J$  6.2, 10.2 Hz, 1H,  $\text{CH}_2\text{O}$ ), 3.63 (dd,  $J$  7.8, 10.3 Hz, 1H,  $\text{CH}_2\text{O}$ ), 3.60 (s, 3H,  $\text{CH}_3$ ), 2.88-2.94 (m, 1H,  $\text{C}^2\text{H}$ ), 2.73-2.79 (m, 1H,  $\text{C}^1\text{H}$ ), 2.59 (dd,  $J$  5.6, 15.0 Hz, 1H  $\text{CH}_2\text{CO}_2\text{Me}$ ), 2.23 (dd,  $J$  9.5, 14.9 Hz, 1H  $\text{CH}_2\text{CO}_2\text{Me}$ ), 1.70 (quint,  $J$  2.6 Hz, 1H,  $\text{C}^5\text{H}$ ), 0.90 (s, 9H,  $(\text{CH}_3)_3\text{C}$ ), 0.13 (s, 6H,  $(\text{CH}_3)_2\text{Si}$ ), 0.0 (s, 9H,  $(\text{CH}_3)_3\text{Si}$ );  $\delta_{\text{C}}$  (125.77 MHz,  $(\text{CD}_3)_2\text{CO}$ ): 173.12 ( $\text{C}=\text{O}$ ), 132.15 ( $\text{C}^4$ ), 127.38 ( $\text{C}^3$ ), 62.42 ( $\text{CH}_2\text{O}$ ), 50.62 ( $\text{CH}_3$ ), 41.54 ( $\text{C}^5$  and  $\text{C}^2$ ), 37.99 ( $\text{C}^1$ ), 35.29 ( $\text{CH}_2\text{CO}_2\text{Me}$ ), 25.35 ( $(\text{CH}_3)_3\text{C}$ ), 17.86 ( $(\text{CH}_3)_3\text{C}$ ), -3.55 ( $(\text{CH}_3)_3\text{Si}$ ), -6.11 ( $(\text{CH}_3)_2\text{Si}$ );  $m/z$  (APCI): 357 (100%,  $[\text{MH}]^+$ ).

## Compounds 24 and 27

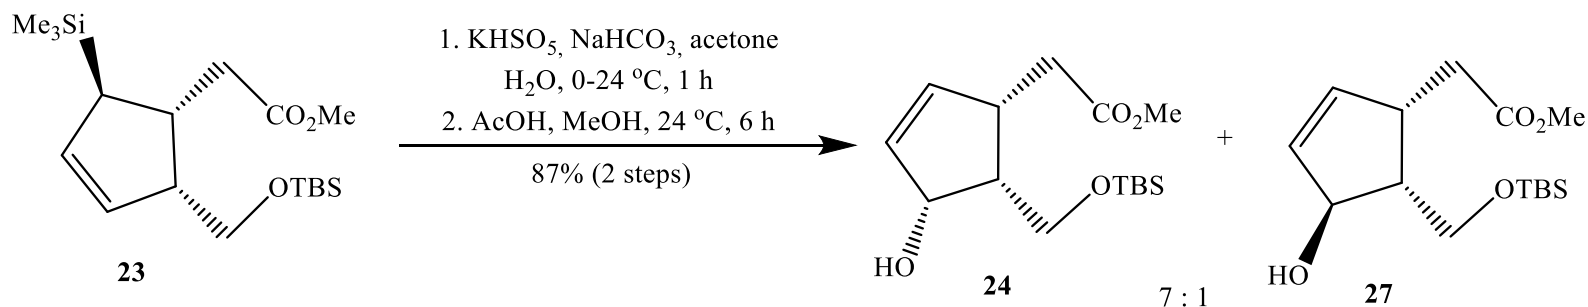

*1 Step:* Solid NaHCO<sub>3</sub> (1.74 g, 20.7 mmol) was placed in a round-bottom flask and water (24 mL) followed by acetone (38 mL) were added. The resulting mixture was cooled to 0 °C and stirred for 20 min. Oxone® (1.74 g, 3.55 mmol) was added in one portion and stirring was continued at 0 °C for 15 min. Then, silane **23** (0.62 g, 1.74 mmol) was added in one portion. Cooling was removed and the reaction mixture was stirred for 1 h (monitored by TLC) at rt. The resulting mixture was diluted with water (20 mL) and extracted with EA (3×30 mL). The combined organic layers were dried (MgSO<sub>4</sub>) and the solvent was evaporated under reduced pressure.

*Step 2:* The aforementioned residue was diluted with 9:1-mixture of MeOH-CH<sub>3</sub>COOH (10 mL) and resulting mixture was stirred for 6 h (monitored by TLC). The solvent was removed under reduced pressure and the residue was purified by column chromatography (5:1 PE/EA as eluent) to afford *title compounds*.

**Compound 24.** Yield 0.39 g (76%), transparent colorless liquid; [Found: C, 59.74; H, 9.12. C<sub>15</sub>H<sub>28</sub>O<sub>4</sub>Si requires C, 59.96; H, 9.39%]; [ $\alpha$ ]<sub>D</sub><sup>20</sup> +48.4 (c 1.05, CH<sub>2</sub>Cl<sub>2</sub>); R<sub>f</sub> (petroleum ether/ethyl acetate, 5:1) 0.4; IR (liquid film)  $\nu_{\max}$ , cm<sup>-1</sup>: 3377, 2857, 1739, 1471, 1252, 1085, 838, 773;  $\delta_{\text{H}}$  (500 MHz, (CD<sub>3</sub>)<sub>2</sub>CO): 6.04-6.00 (m, 1H, C<sup>3</sup>H), 5.90-5.86 (m, 1H, C<sup>2</sup>H), 4.61-4.57 (m, 1H, C<sup>4</sup>H), 3.96 (dd, *J* 10.4, 6.7 Hz, 1H, CH<sub>2</sub>OSi), 3.79 (dd, *J* 10.3, 5.8 Hz, 1H, CH<sub>2</sub>OSi), 3.62 (s, 3H, CH<sub>3</sub>), 3.51 (d, *J* 5.3 Hz, 1H, OH), 3.02-2.95 (m, 1H, C<sup>1</sup>H), 2.70 (dd, *J* 15.7, 5.3 Hz, 1H, CH<sub>2</sub>CO<sub>2</sub>), 2.32 (quint, *J* 7.0 Hz, 1H, C<sup>5</sup>H), 2.30 (dd, *J* 15.7, 10.1 Hz, 1H, CH<sub>2</sub>CO<sub>2</sub>), 0.90 (s, 9H, (CH<sub>3</sub>)<sub>3</sub>Si), 0.08 (s, 6H, (CH<sub>3</sub>)<sub>2</sub>Si);  $\delta_{\text{C}}$  (125.77 MHz, (CD<sub>3</sub>)<sub>2</sub>CO): 172.90 (C=O), 137.89 (C<sup>3</sup>), 133.76 (C<sup>2</sup>), 74.91 (C<sup>4</sup>), 59.95 (CH<sub>2</sub>OSi), 50.65 (CH<sub>3</sub>O), 47.26 (C<sup>5</sup>), 41.68 (C<sup>1</sup>), 36.03 (CH<sub>2</sub>CO<sub>2</sub>), 25.38 ((CH<sub>3</sub>)<sub>3</sub>C), 17.86 ((CH<sub>3</sub>)<sub>3</sub>C), -6.08 ((CH<sub>3</sub>)<sub>2</sub>Si); m/z (APCI): 283 (100%, [M-OH]<sup>+</sup>).

**Compound 27.** Yield 62 mg (11%), transparent colorless liquid; [Found: C, 59.81; H, 9.16. C<sub>15</sub>H<sub>28</sub>O<sub>4</sub>Si requires C, 59.96; H, 9.39%];  $[\alpha]_D^{20} +88.7$  (*c* 1.13, CH<sub>2</sub>Cl<sub>2</sub>); R<sub>f</sub> (petroleum ether/ethyl acetate, 5:1) 0.4; IR (liquid film)  $\nu_{max}$ , cm<sup>-1</sup>: 3377, 2857, 1739, 1471, 1252, 1085, 838, 773;  $\delta_H$  (500 MHz, (CD<sub>3</sub>)<sub>2</sub>CO): .85-5.81 (m, 1H, C<sup>3</sup>H), 5.76-5.72 (m, 1H, C<sup>2</sup>H), 4.61-4.55 (m, 1H, C<sup>4</sup>H), 3.85 (dd, *J* 10.4, 5.2 Hz, 2H, CH<sub>2</sub>OSi, OH), 3.77 (dd, *J* 10.5, 8.4 Hz, 1H, CH<sub>2</sub>OSi), 3.61 (s, 3H, CH<sub>3</sub>), 3.25-3.16 (m, 1H, C<sup>1</sup>H), 2.71 (dd, *J* 15.7, 5.7 Hz, 1H, CH<sub>2</sub>CO<sub>2</sub>), 2.22-2.18 (m, 1H, C<sup>5</sup>H), 2.14 (dd, *J* 15.6, 10.1 Hz, 1H, CH<sub>2</sub>CO<sub>2</sub>), 0.90 (s, 9H, (CH<sub>3</sub>)<sub>3</sub>Si), 0.08 (s, 6H, (CH<sub>3</sub>)<sub>2</sub>Si);  $\delta_C$  (125.77 MHz, (CD<sub>3</sub>)<sub>2</sub>CO): 172.85 (C=O), 135.45 (C<sup>3</sup>), 135.02 (C<sup>2</sup>), 77.40 (C<sup>4</sup>), 61.28 (CH<sub>2</sub>OSi), 52.47 (C<sup>5</sup>), 50.67 (CH<sub>3</sub>O), 41.89 (C<sup>1</sup>), 34.72 (CH<sub>2</sub>CO<sub>2</sub>), 25.36 ((CH<sub>3</sub>)<sub>3</sub>C), 17.85 ((CH<sub>3</sub>)<sub>3</sub>C), -6.14 ((CH<sub>3</sub>)<sub>2</sub>Si); m/z (APCI): 301 (100%, [MH]<sup>+</sup>).

### Compound 28

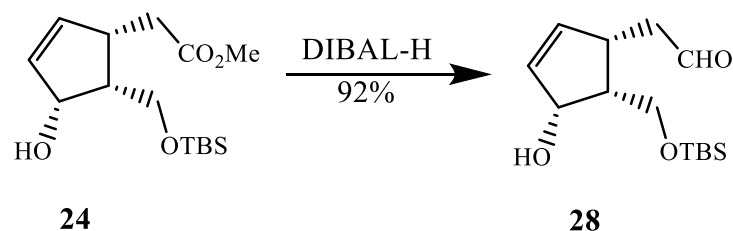

To a stirred solution of 0.74 g (2.5 mmol) **24** in absolute CH<sub>2</sub>Cl<sub>2</sub> (50 mL) at -78 °C was added dropwise 0.71 g (5.0 mmol) DIBAL-H in absolute CH<sub>2</sub>Cl<sub>2</sub> (20 mL). The reaction was monitored by TLC (petroleum ether/ethyl acetate, 1:1). After stirring for 30 min at the same temperature was added 20 mL sat. NH<sub>4</sub>Cl and the reaction mixture was warmed up to rt. The resulting mixture was filtered, evaporated under reduced pressure and extracted 3x30 mL CH<sub>2</sub>Cl<sub>2</sub>. The combined organic layers dried over MgSO<sub>4</sub> and evaporated. Purification of products by column chromatography (petroleum ether/ethyl acetate, 3:1) afforded *title compound* (0.61 g, 92%) as a transparent viscous oil; [Found: C, 61.97; H, 9.41. C<sub>14</sub>H<sub>26</sub>O<sub>3</sub>Si requires C, 62.18; H, 9.69%]; R<sub>f</sub> (petroleum ether/ethyl acetate = 5:1) 0.3;  $[\alpha]_D^{20} +22.0$  (*c* 1.0, CH<sub>2</sub>Cl<sub>2</sub>); IR (liquid film)  $\nu_{max}$ , cm<sup>-1</sup>: 3415, 2954, 2929, 2896, 2856, 1725, 1471, 1253, 1085, 837, 776;  $\delta_H$  (500 MHz, (CD<sub>3</sub>)<sub>2</sub>CO): 9.79 (s, 1H, CHO), 6.02 (dd, *J* 5.5, 2.5 Hz, 1H, C<sup>2</sup>H), 5.87 (dd, *J* 4.1, 2.2 Hz, 1H, C<sup>3</sup>H), 4.62 (td, *J* 6.0, 2.3 Hz, 1H, C<sup>1</sup>H), 3.96 (dd, *J* 10.5, 6.5 Hz, 1H, CH<sub>2</sub>CHO), 3.78 (t, *J* 10.4 Hz, 1H, CH<sub>2</sub>CHO), 3.12-3.09 (m, 1H, C<sup>4</sup>H), 2.85 (br s, 1H, OH) 2.75 (dd, *J* 5.8, 1.5 Hz, 1H, CH<sub>2</sub>OSi), 2.47 (dd, *J* 8.4, 1.5 Hz, 1H, CH<sub>2</sub>OSi), 2.33 (quint, *J* 7.9 Hz, 1H, C<sup>5</sup>H), 0.89 (s, 9H, (CH<sub>3</sub>)<sub>3</sub>C), 0.07 (s, 6H,

(CH<sub>3</sub>)<sub>2</sub>Si);  $\delta_C$  (125.77 MHz, (CD<sub>3</sub>)<sub>2</sub>CO): 201.80 (C=O), 137.87 (C<sup>2</sup>), 133.44 (C<sup>3</sup>), 74.87 (C<sup>1</sup>), 60.02 (CH<sub>2</sub>OSi), 47.33 (C<sup>5</sup>), 46.09 (CH<sub>2</sub>CHO), 39.62 (C<sup>4</sup>), 25.38 ((CH<sub>3</sub>)<sub>3</sub>C), 17.84 ((CH<sub>3</sub>)<sub>3</sub>C), -6.10 ((CH<sub>3</sub>)<sub>2</sub>Si); m/z (APCI): 301 (100%, [M-TBS]<sup>+</sup>).

### Compounds 29 and 30

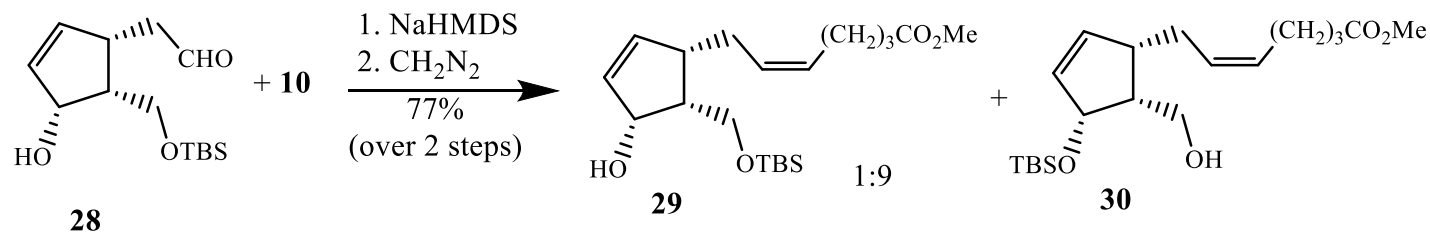

A solution of 2.69 g (6.1 mmol) of triphenylphosphonium salt of 5-bromopentanoate **10** in 80 mL of anhydrous THF was cooled under argon atmosphere to  $-78\text{ }^\circ\text{C}$  and 8.54 mL of a 1.6 M solution of hexamethyldisilazane sodium in THF was added with stirring. The mixture was warmed up to  $0\text{ }^\circ\text{C}$  and stirred for 30 min, then cooled to  $-78\text{ }^\circ\text{C}$  and a solution of 0.41 g (1.51 mmol) of aldehyde **28** in 15 mL of anhydrous THF was added to the resulting bright orange solution. The resulting mixture was warmed up to rt and stirred for 1 h 30 min (TLC monitoring), and 10 mL of a saturated solution of ammonium chloride was added. The mixture was filtered, the organic phase was separated, and the aqueous phase was extracted with ethyl acetate ( $3 \times 50\text{ mL}$ ). The extracts were combined with the organic phase, dried over MgSO<sub>4</sub>, and evaporated under reduced pressure. The crude residue without purification was treated with excess of ether solution of diazomethane in 3 h at  $0\text{ }^\circ\text{C}$ , then filtered, washed with ether, evaporated under reduced pressure and purified by column chromatography using petroleum ether–ethyl acetate (gradient elution from 40:1 to 5:1) as eluent with obtaining of *title compounds*.

**Compound 29.** Yield 42 mg (7.7%), transparent viscous oil; [Found: C, 64.91; H, 9.54. C<sub>20</sub>H<sub>36</sub>O<sub>4</sub>Si requires C, 65.17; H, 9.85%]; R<sub>f</sub> (petroleum ether/ethyl acetate = 5:1) 0.45;  $[\alpha]_D^{20} +46.3$  (c 0.6, CH<sub>2</sub>Cl<sub>2</sub>); IR (liquid film)  $\nu_{\text{max}}$ , cm<sup>-1</sup>: 3477, 2953, 2856, 1741, 1463, 1255, 1081, 837, 776;  $\delta_H$  (500 MHz, (CD<sub>3</sub>)<sub>2</sub>CO): 6.03 (dd, *J* 5.7, 2.6 Hz, 1H, C<sup>2</sup>H), 5.87-5.83 (m, 1H, C<sup>3</sup>H), 5.52-5.45 (m, 1H, C<sup>6</sup>'H), 5.39-5.33 (m, 1H, C<sup>5</sup>'H), 4.60 (dd, *J* 6.3, 2.3 Hz, 1H, C<sup>4</sup>H), 3.98 (dd, *J* 10.3, 6.9 Hz, 1H, CH<sub>2</sub>O), 3.87 (dd, *J* 10.2, 8.3 Hz, 1H, CH<sub>2</sub>O), 3.60 (s, 3H, CH<sub>3</sub>O), 2.84 (s, 1H, OH), 2.61-2.55 (m, 1H, C<sup>1</sup>H), 2.42-2.36 (m, 1H, C<sup>7</sup>'H), 2.29 (t, *J* 7.5 Hz, 2H, C<sup>2</sup>'H), 2.29-2.22 (m, 1H, C<sup>5</sup>H), 2.09-2.01 (m, 3H, C<sup>4</sup>'H<sub>2</sub> and C<sup>7</sup>'H), 1.63 (quint, *J* 7.4 Hz, 2H,

C<sup>3'</sup>H), 0.91 (s, 9H, (CH<sub>3</sub>)<sub>3</sub>C), 0.09 (s, 6H, (CH<sub>3</sub>)<sub>2</sub>Si);  $\delta_C$  (125.77 MHz, (CD<sub>3</sub>)<sub>2</sub>CO): 173.16 (C=O), 138.96 (C<sup>2</sup>), 132.88 (C<sup>3</sup>), 129.45 (C<sup>6'</sup>), 129.07 (C<sup>5'</sup>), 75.0 (C<sup>4</sup>), 60.15 (CH<sub>2</sub>O), 50.62 (CH<sub>3</sub>O), 47.80 (C<sup>5</sup>), 45.62 (C<sup>1</sup>), 32.91 (C<sup>2'</sup>), 29.89 (C<sup>7'</sup>), 26.43 (C<sup>4'</sup>), 25.41 ((CH<sub>3</sub>)<sub>3</sub>C), 24.74 (C<sup>3'</sup>), 17.87 ((CH<sub>3</sub>)<sub>3</sub>C), -6.04 ((CH<sub>3</sub>)<sub>2</sub>Si); m/z (APCI): 351.2 (100%, [M-OH]<sup>+</sup>).

**Compound 30.** Yield 0.38 g (69%), transparent viscous oil; [Found: C, 64.97; H, 9.63. C<sub>20</sub>H<sub>36</sub>O<sub>4</sub>Si requires C, 65.17; H, 9.85%]; R<sub>f</sub> (petroleum ether/ethyl acetate = 5:1) 0.4;  $[\alpha]_D^{20} +12.2$  (c 1.07, CH<sub>2</sub>Cl<sub>2</sub>); IR (liquid film)  $\nu_{max}$ , cm<sup>-1</sup>: 3467, 2953, 2856, 1739, 1472, 1250, 1065, 836, 775;  $\delta_H$  (500 MHz, (CD<sub>3</sub>)<sub>2</sub>CO): 6.07 (dd, *J* 8.2, 5.5 Hz, 1H, C<sup>2</sup>H), 5.89-5.84 (m, 1H, C<sup>3</sup>H), 5.53-5.45 (m, 1H, C<sup>6'</sup>H), 5.41-5.33 (m, 1H, C<sup>5'</sup>H), 4.65 (dd, *J* 5.8, 2.4 Hz, 1H, C<sup>4</sup>H), 3.88 (dd, *J* 10.1, 7.4 Hz, 1H, CH<sub>2</sub>O), 3.80 (dd, *J* 10.1, 7.9 Hz, 1H, CH<sub>2</sub>O), 3.61 (s, 3H, CH<sub>3</sub>O), 2.86 (br s, 1H, OH), 2.60-2.55 (m, 1H, C<sup>1</sup>H), 2.36-2.30 (m, 1H, C<sup>7'</sup>H), 2.28 (t, *J* 7.6 Hz, 2H, C<sup>2'</sup>H), 2.21-2.15 (m, 1H, C<sup>5</sup>H), 2.09-2.02 (m, 3H, C<sup>4'</sup>H<sub>2</sub> and C<sup>7'</sup>H), 1.63 (quint, *J* 7.6 Hz, 2H, C<sup>3'</sup>H), 0.89 (s, 9H, (CH<sub>3</sub>)<sub>3</sub>C), 0.09 (s, 6H, (CH<sub>3</sub>)<sub>2</sub>Si);  $\delta_C$  (125.77 MHz, (CD<sub>3</sub>)<sub>2</sub>CO): 173.93 (C=O), 140.56 (C<sup>2</sup>), 133.45 (C<sup>3</sup>), 129.86 (C<sup>6'</sup>), 129.83 (C<sup>5'</sup>), 76.49 (C<sup>4</sup>), 60.31 (CH<sub>2</sub>O), 51.50 (CH<sub>3</sub>O), 49.29 (C<sup>5</sup>), 46.15 (C<sup>1</sup>), 33.88 (C<sup>2'</sup>), 30.79 (C<sup>7'</sup>), 27.36 (C<sup>4'</sup>), 26.23 ((CH<sub>3</sub>)<sub>3</sub>C), 25.64 (C<sup>3'</sup>), 18.32 ((CH<sub>3</sub>)<sub>3</sub>C), -5.77 ((CH<sub>3</sub>)<sub>2</sub>Si); m/z (APCI): 367 (100%, [M-H]<sup>+</sup>).

### Compound 31

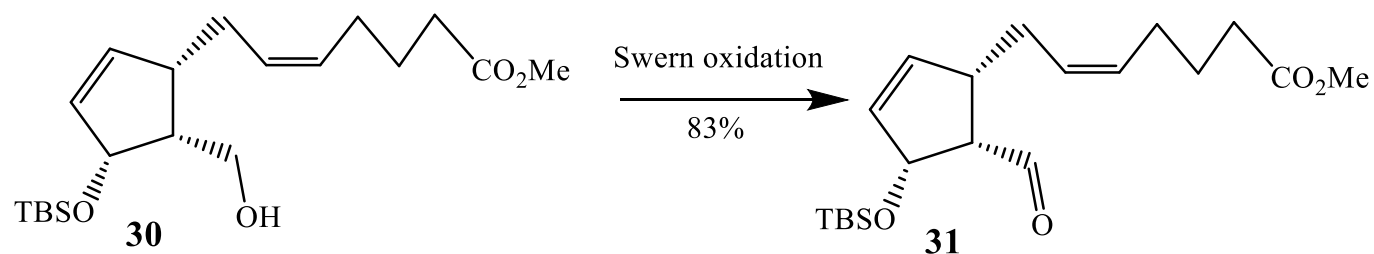

To a solution of 0.29 mL (3.4 mmol) of oxalyl chloride in DCM (15 mL) cooled at -70°C under argon atmosphere was added neat 0.53 mL (7.6 mmol) DMSO dropwise and stirred for 5 min. To the above, a solution of 0.74 g (2.0 mmol) **8** in DCM (20 mL) was added dropwise. The reaction mixture was stirred for 15 minutes at this temperature and 1.6 mL (11.5 mmol) Et<sub>3</sub>N was added dropwise at -70 °C. The reaction mixture was allowed to warm to rt, water (20 mL) was added and the organic layer was separated. The aqueous layer was extracted with CH<sub>2</sub>Cl<sub>2</sub> (30 mLx3). The combined organic layers were dried over anhydrous Na<sub>2</sub>SO<sub>4</sub>, filtered and evaporated under reduced pressure. Purification of products by column chromatography

(petroleum ether/ethyl acetate, 10:1) afforded *title compound* (0.6 g, 83%) as a yellowish transparent oil; [Found: C, 65.36; H, 9.22. C<sub>20</sub>H<sub>34</sub>O<sub>4</sub>Si requires C, 65.53; H, 9.35%]; R<sub>f</sub> (petroleum ether/ethyl acetate = 10:1) 0.5; [ $\alpha$ ]<sub>D</sub><sup>20</sup>: +21.6 (*c* 0.65, CH<sub>2</sub>Cl<sub>2</sub>); IR (liquid film)  $\nu_{\max}$ , cm<sup>-1</sup>: 2953, 2930, 2857, 1738, 1472, 1251, 1059, 838, 777;  $\delta_{\text{H}}$  (500 MHz, (CD<sub>3</sub>)<sub>2</sub>CO): 9.76 (d, *J* 4.6 Hz, 1H, CHO), 6.0 (d, *J* 5.5 Hz, 1H, C<sup>2</sup>H), 5.91 (td, *J* 5.5, 1.8 Hz, 1H, C<sup>3</sup>H), 5.45 (dd, *J* 11.0, 6.4 Hz, 1H, C<sup>6'</sup>H), 5.40 (dd, *J* 11.0, 6.4 Hz, 1H, C<sup>5'</sup>H), 5.16 (dd, *J* 6.7, 1.2 Hz, 1H, C<sup>4</sup>H), 3.60 (s, 3H, CH<sub>3</sub>), 2.95 (dd, *J* 6.7, 4.9 Hz, 1H, C<sup>1</sup>H), 2.91 (td, *J* 7.0, 1.5 Hz, 1H, C<sup>5</sup>H), 2.31-2.26 (m, 3H, C<sup>7'</sup>H and C<sup>2'</sup>H<sub>2</sub>), 2.08-2.01 (m, 3H, C<sup>4'</sup>H<sub>2</sub> and C<sup>7</sup>H), 1.63 (quint, *J* 7.5 Hz, 2H, C<sup>3'</sup>H<sub>2</sub>), 0.86 (s, 9H, (CH<sub>3</sub>)<sub>3</sub>Si), 0.1 (s, 6H, (CH<sub>3</sub>)<sub>2</sub>Si);  $\delta_{\text{C}}$  (125.77 MHz, (CD<sub>3</sub>)<sub>2</sub>CO): 203.11 (CHO), 173.07 (CO<sub>2</sub>Me), 136.53 (C<sup>2</sup>), 133.32 (C<sup>3</sup>), 130.07 (C<sup>6'</sup>), 128.15 (C<sup>5'</sup>), 78.38 (C<sup>4</sup>), 58.14 (C<sup>5</sup>), 50.61 (CH<sub>3</sub>O), 46.29 (C<sup>1</sup>), 32.85 (C<sup>2'</sup>), 28.61 (C<sup>7'</sup>), 26.43 (C<sup>4'</sup>), 25.22 ((CH<sub>3</sub>)<sub>3</sub>C), 24.59 (C<sup>3'</sup>), 17.67 ((CH<sub>3</sub>)<sub>3</sub>C), -5.34 (CH<sub>3</sub>Si), -5.87 (CH<sub>3</sub>Si); *m/z* (APCI): 219.1 (100%, [M-O-OTBS]<sup>+</sup>).

### Compounds 32 and 33

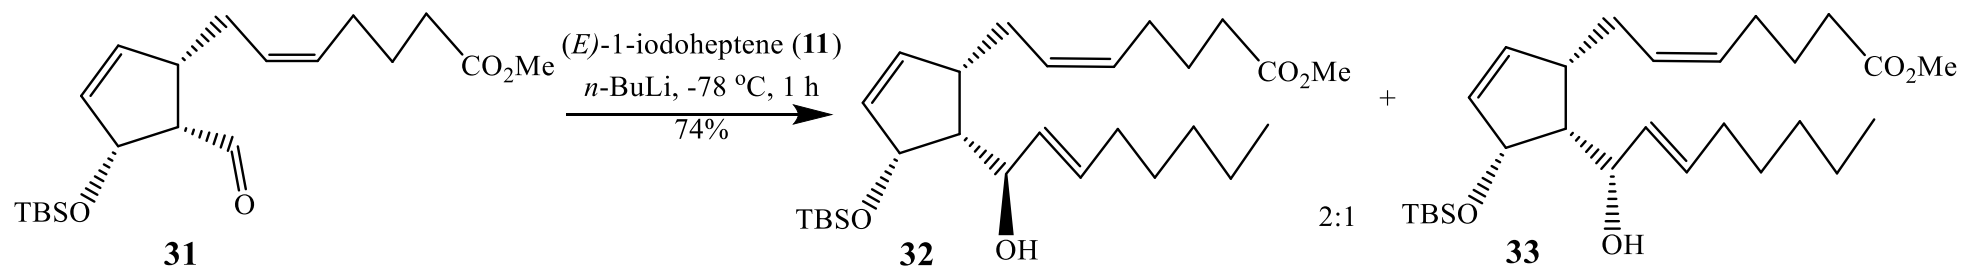

To a stirred solution of *trans*-1-iodoheptene (107 mg, 0.48 mmol) in anhydrous THF (10 mL) under argon atmosphere was added 1.93 M solution of *n*-butyllithium in hexane (0.28 mL) at -78 °C. The mixture was stirred for 30 min at the same temperature and then a solution of aldehyde **31** (117 mg, 0.32 mmol) in anhydrous THF (10 mL) was added dropwise. The resulting mixture was stirred for 30 min at -78 °C (monitored by TLC) and a saturated solution of ammonium chloride (10 mL) was added. The organic phase was separated and the aqueous phase was extracted with EA (3×20 mL). The combined organic extracts were dried (MgSO<sub>4</sub>) and the solvent was evaporated under reduced pressure. The residue was purified by column chromatography (10:1 PE/EA as eluent) to afford *title compounds*.

**Compound 32.** Yield 73 mg (50%), transparent light-yellow liquid; [Found: C, 69.57; H, 10.14.  $C_{27}H_{48}O_4Si$  requires C, 69.78; H, 10.41%];  $R_f$  (petroleum ether/ethyl acetate = 10:1) 0.55;  $[\alpha]_D^{20} +20$  (c 1.2,  $CH_2Cl_2$ ); IR (liquid film)  $\nu_{max}$ ,  $cm^{-1}$ : 3459, 2954, 2855, 1740, 1635, 1471, 1249, 1058, 835, 776;  $\delta_H$  (500 MHz,  $(CD_3)_2CO$ ): 6.11 (dd,  $J$  5.7, 2.4 Hz, 1H,  $C^2H$ ), 5.93 (dd,  $J$  5.7, 2.3 Hz, 1H,  $C^3H$ ), 5.75 (dt,  $J$  15.4, 7.1 Hz, 1H,  $C^{2''}H$ ), 5.61 (dd,  $J$  15.3, 7.5 Hz, 1H,  $C^{3''}H$ ), 5.45-5.31 (m, 2H,  $C^{6'}H$  and  $C^{5'}H$ ), 4.70 (dd,  $J$  5.3, 2.5 Hz, 1H,  $C^4H$ ), 4.27 (dd,  $J$  10.1, 7.7 Hz, 1H,  $C^{1''}H$ ), 3.60 (s, 3H,  $CH_3O$ ), 2.91 (br.s, 1H, OH), 2.42-2.32 (m, 2H,  $C^1H$  and  $C^7'H$ ), 2.27 (t,  $J$  7.6 Hz, 2H,  $C^2'H_2$ ), 2.17-2.10 (m, 1H,  $C^7'H$ ), 2.09-2.02 (m, 4H,  $C^4'H_2$  and  $C^{4''}H_2$ ), 1.94-1.88 (m, 1H,  $C^5H$ ), 1.62 (quint,  $J$  7.5 Hz, 2H,  $C^3'H_2$ ), 1.43-1.36 (m, 2H,  $C^{5''}H_2$ ), 1.33-1.25 (m, 4H,  $C^{6''}H_2$  and  $C^{7''}H_2$ ), 0.92-0.85 (m, 12H,  $C^{8''}H_3$  and  $(CH_3)_3Si$ ), 0.14 (s, 3H,  $CH_3Si'$ ), 0.09 (s, 3H,  $CH_3Si$ );  $\delta_C$  (125.77 MHz,  $(CD_3)_2CO$ ): 173.06 (C=O), 140.36 ( $C^2$ ), 133.27 ( $C^3$ ), 132.85 ( $C^{3''}$ ), 131.82 ( $C^{2''}$ ), 129.30 ( $C^{5'}$ ), 128.87 ( $C^{6'}$ ), 75.44 ( $C^4$ ), 68.84 ( $C^{1''}$ ), 52.76 ( $C^5$ ), 50.64 ( $CH_3O$ ), 44.95 ( $C^1$ ), 32.99 ( $C^{2'}$ ), 32.18 ( $C^{7'}$ ), 31.17 ( $C^{5''}$ ), 30.52 ( $C^{4''}$ ), 28.88 ( $C^{6''}$ ), 26.54 ( $C^{4'}$ ), 25.42 ( $((CH_3)_3C)$ ), 24.75 ( $C^{7''}$ ), 22.32 ( $C^{3'}$ ), 17.71 ( $((CH_3)_3C)$ ), 13.47 ( $C^{8''}$ ), -4.88 ( $CH_3Si'$ ), -5.70 ( $CH_3Si$ );  $m/z$  (APCI): 447.4 (100%,  $[M-OH]^+$ ).

**Compound 33.** Yield 36 mg (24%), transparent light-yellow liquid; [Found: C, 69.53; H, 10.23.  $C_{27}H_{48}O_4Si$  requires C, 69.78; H, 10.41%];  $R_f$  (petroleum ether/ethyl acetate = 10:1) 0.45;  $[\alpha]_D^{20} +16$  (c 0.76,  $CH_2Cl_2$ ); IR (liquid film)  $\nu_{max}$ ,  $cm^{-1}$ : 3451, 2955, 2856, 1740, 1471, 1255, 1055, 836, 775;  $\delta_H$  (500 MHz,  $(CD_3)_2CO$ ): 6.14 (dd,  $J$  5.7, 2.8 Hz, 1H,  $C^2H$ ), 5.91 (dd,  $J$  5.5, 1.5 Hz, 1H,  $C^3H$ ), 5.78 (dt,  $J$  15.6, 5.8 Hz, 1H,  $C^{2''}H$ ), 5.72 (dd,  $J$  15.6, 4.9 Hz, 1H,  $C^{3''}H$ ), 5.54-5.45 (m, 1H,  $C^{5'}H$ ), 5.42-5.33 (m, 1H,  $C^{6'}H$ ), 4.50 (dd,  $J$  5.4, 2.4 Hz, 1H,  $C^4H$ ), 4.31 (dd,  $J$  10.2, 4.9 Hz, 1H,  $C^{1''}H$ ), 3.60 (s, 3H,  $CH_3O$ ), 2.80 (br.s, 1H, OH), 2.78-2.72 (m, 1H,  $C^7'H$ ), 2.64-2.57 (m, 1H,  $C^1H$ ), 2.28 (t,  $J$  7.6 Hz, 2H,  $C^2'H_2$ ), 2.21-2.13 (m, 1H,  $C^7'H$ ), 2.09-2.02 (m, 4H,  $C^4'H_2$  and  $C^{4''}H_2$ ), 1.95-1.88 (m, 1H,  $C^5H$ ), 1.63 (quint,  $J$  7.5 Hz, 2H,  $C^3'H_2$ ), 1.43-1.37 (m, 2H,  $C^{5''}H_2$ ), 1.34-1.25 (m, 4H,  $C^{6''}H_2$  and  $C^{7''}H_2$ ), 0.90-0.85 (m, 12H,  $C^{8''}H_3$  and  $(CH_3)_3Si$ ), 0.09 (s, 3H,  $CH_3Si'$ ), 0.07 (s, 3H,  $CH_3Si$ );  $\delta_C$  (125.77 MHz,  $(CD_3)_2CO$ ): 173.08 (C=O), 140.71 ( $C^2$ ), 133.58 ( $C^3$ ), 132.52 ( $C^{3''}$ ), 129.80 ( $C^{2''}$ ), 129.76 ( $C^{5'}$ ), 128.78 ( $C^{6'}$ ), 75.73 ( $C^4$ ), 68.19 ( $C^{1''}$ ), 53.72 ( $C^5$ ), 50.60 ( $CH_3O$ ), 45.71 ( $C^1$ ), 33.04 ( $C^{2'}$ ), 32.11 ( $C^{7'}$ ), 31.22 ( $C^{5''}$ ), 30.31 ( $C^{4''}$ ), 28.48 ( $C^{6''}$ ), 26.55 ( $C^{4'}$ ), 25.45 ( $((CH_3)_3C)$ ), 24.84 ( $C^{7''}$ ), 22.31 ( $C^{3'}$ ), 17.59 ( $((CH_3)_3C)$ ), 13.43 ( $C^{8''}$ ), -4.00 ( $CH_3Si'$ ), -5.67 ( $CH_3Si$ );  $m/z$  (APCI): 447.4 (100%,  $[M-OH]^+$ ).

## Compound 34

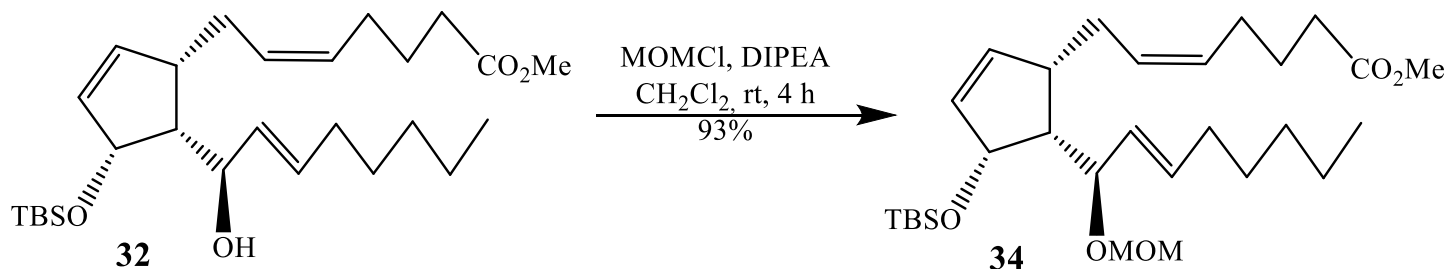

A solution of 0.06 mL (0.81 mmol) of chloromethyl methyl ether in methylene chloride (10 mL) was added under stirring to a mixture of 0.12 g (0.27 mmol) of monoprotected diol **32**, 0.28 mL (1.6 mmol) of N,N-diisopropylethylamine and 10 mL of methylene chloride at 0°C. The mixture was stirred for 4 h at rt (monitored by TLC) and evaporated under reduced pressure. Purification of the product by column chromatography (petroleum ether/ethyl acetate, 60:1) afforded *title compound* (0.13 g, 93%) as a transparent viscous oil; [Found: C, 68.32; H, 10.15. C<sub>29</sub>H<sub>52</sub>O<sub>5</sub>Si requires C, 68.46; H, 10.30%]; R<sub>f</sub> (petroleum ether/ethyl acetate = 20:1) 0.5; [α]<sub>D</sub><sup>20</sup>: +34 (c 0.7, CH<sub>2</sub>Cl<sub>2</sub>); IR (liquid film) ν<sub>max</sub>, cm<sup>-1</sup>: 3057, 2955, 2928, 2856, 1743 (C=O), 1465, 1437, 1360, 1256, 1158, 1057, 1040, 967, 939, 897, 835, 799, 777, 751, 664; δ<sub>H</sub> (500 MHz, (CD<sub>3</sub>)<sub>2</sub>CO): 6.15 (dd, *J* 5.8, 1.8 Hz, 1H, C<sup>2</sup>H), 5.98 (dd, *J* 5.8, 1.9 Hz, 1H, C<sup>3</sup>H), 5.81 (dt, *J* 15.5, 6.8 Hz, 1H, C<sup>2''</sup>H), 5.46 (dd, *J* 15.5, 9.0 Hz, 1H, C<sup>3''</sup>H), 5.42-5.29 (m, 2H, C<sup>6'</sup>H and C<sup>5'</sup>H), 4.65 (s, 2H, OCH<sub>2</sub>O), 4.68-4.63 (m, 1H, C<sup>4</sup>H), 4.13 (dd, *J* 10.5, 9.2 Hz, 1H, C<sup>1''</sup>H), 3.61 (s, 3H, CO<sub>2</sub>CH<sub>3</sub>), 3.29 (s, 1H, CH<sub>3</sub>O), 2.83 (s, 1H, C<sup>1</sup>H), 2.43-2.37 (m, 1H, C<sup>7'</sup>H), 2.36-2.30 (m, 1H, C<sup>7''</sup>H), 2.27 (t, *J* 7.7 Hz, 2H, C<sup>2'</sup>H<sub>2</sub>), 2.15-2.08 (m, 2H, C<sup>4''</sup>H<sub>2</sub>), 2.08-1.98 (m, 3H, C<sup>5</sup>H, C<sup>4'</sup>H<sub>2</sub>), 1.61 (quint, *J* 7.5 Hz, 2H, C<sup>3'</sup>H<sub>2</sub>), 1.48-1.40 (m, 2H, C<sup>5''</sup>H<sub>2</sub>), 1.35-1.27 (m, 4H, C<sup>6''</sup>H<sub>2</sub> and C<sup>7''</sup>H<sub>2</sub>), 0.93-0.87 (m, 12H, C<sup>8''</sup>H<sub>3</sub> and (CH<sub>3</sub>)<sub>3</sub>Si), 0.10 (d, *J* 2.6 Hz, 6H, (CH<sub>3</sub>)<sub>2</sub>Si); δ<sub>C</sub> (125.77 MHz, (CD<sub>3</sub>)<sub>2</sub>CO): 173.02 (C=O), 140.37 (C<sup>2</sup>), 135.13 (C<sup>3</sup>), 133.22 (C<sup>3''</sup>), 129.99 (C<sup>2''</sup>), 129.17 (C<sup>5'</sup>), 129.03 (C<sup>6'</sup>), 94.86 (OCH<sub>2</sub>O), 75.79 (C<sup>4</sup>), 74.82 (C<sup>1''</sup>), 54.77 (C<sup>5</sup>), 50.62 (CH<sub>3</sub>O), 52.02 (CO<sub>2</sub>CH<sub>3</sub>), 44.77 (C<sup>1</sup>), 32.97 (C<sup>7'</sup>), 32.19 (C<sup>2'</sup>), 31.17 (C<sup>5''</sup>), 30.23 (C<sup>4''</sup>), 29.09 (C<sup>6''</sup>), 26.59 (C<sup>4'</sup>), 25.58 ((CH<sub>3</sub>)<sub>3</sub>C), 24.74 (C<sup>3'</sup>), 22.30 (C<sup>7''</sup>), 17.70 ((CH<sub>3</sub>)<sub>3</sub>C), 13.45 (C<sup>8''</sup>), -4.20 (CH<sub>3</sub>Si), -5.51 (CH<sub>3</sub>Si); m/z (APCI): 315.2 (100%, [M-MOM-TBSOH]<sup>+</sup>).

## Compound 35

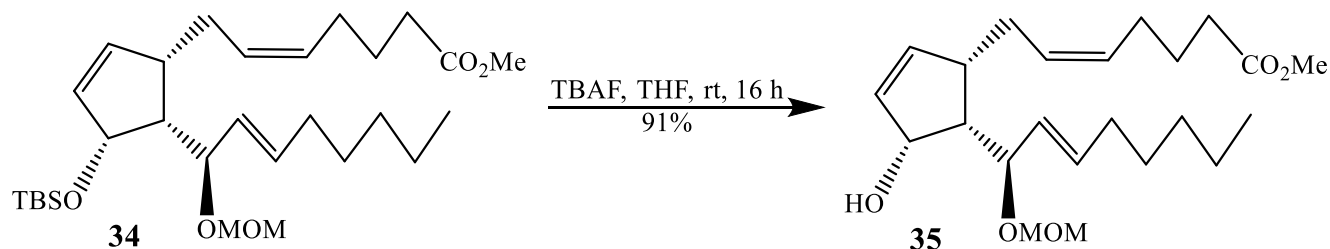

To a stirred solution of 0.13 g (0.26 mmol) of compound **34** in THF (25 mL) at rt was added 0.26 mL (0.26 mmol) 1M solution TBAF in THF. The reaction was monitored by TLC (petroleum ether/ethyl acetate, 1:1) and after stirring for 3 h at rt the solution was evaporated under reduced pressure. Purification of products by column chromatography (petroleum ether/ethyl acetate, 3:1) afforded *title compound* (90 mg, 91%) as a colorless oily liquid; [Found: C, 69.88; H, 9.53. C<sub>23</sub>H<sub>38</sub>O<sub>5</sub> requires C, 70.02; H, 9.71%]; R<sub>f</sub> (petroleum ether/ethyl acetate = 3:1) 0.5; [ $\alpha$ ]<sub>D</sub><sup>20</sup>: +9 (c 0.9, CH<sub>2</sub>Cl<sub>2</sub>); IR (liquid film)  $\nu_{\text{max}}$ , cm<sup>-1</sup>: 3483, 3055, 2955, 2858, 1731, 1669, 1459, 1376, 1315, 1259, 1213, 1157, 1094, 1047, 977, 934, 856, 807, 749, 700;  $\delta_{\text{H}}$  (500 MHz, (CD<sub>3</sub>)<sub>2</sub>CO): 6.13 (dd, *J* 5.7, 2.7 Hz, 1H, C<sup>2</sup>H), 5.93 (dd, *J* 5.8, 1.9 Hz, 1H, C<sup>3</sup>H), 5.84 (dt, *J* 15.5, 7.0 Hz, 1H, C<sup>2''</sup>H), 5.47-5.32 (m, 3H, C<sup>6'</sup>H, C<sup>5'</sup>H, C<sup>3''</sup>H), 4.71 (d, *J* 6.3 Hz, 1H, OCH<sub>2</sub>O), 4.64-4.59 (m, 1H, C<sup>4</sup>H), 4.55 (d, *J* 6.3 Hz, 1H, OCH<sub>2</sub>O), 4.24 (dd, *J* 10.9, 8.9 Hz, 1H, C<sup>1''</sup>H), 3.61 (s, 3H, CO<sub>2</sub>CH<sub>3</sub>), 3.36 (s, 3H, CH<sub>3</sub>O), 3.22 (d, *J* 4.2 Hz, 1H, C<sup>1</sup>H), 2.82 (br.s, 1H, OH), 2.39-2.46 (m, 1H, C<sup>7'</sup>H), 2.34 (t, *J* 7.1 Hz, 3H, C<sup>2'</sup>H<sub>2</sub> and C<sup>7</sup>H), 2.28 (t, *J* 7.5 Hz, 1H, C<sup>4''</sup>H), 2.12 (q, *J* 7.1 Hz, 1H, C<sup>4''</sup>H) 2.08-1.98 (m, 3H, C<sup>5</sup>H and C<sup>4'</sup>H<sub>2</sub>), 1.62 (quint, *J* 7.4 Hz, 2H, C<sup>3'</sup>H<sub>2</sub>), 1.46-1.35 (m, 3H, C<sup>7''</sup>H and C<sup>5''</sup>H<sub>2</sub>), 1.33-1.27 (m, 3H, C<sup>6''</sup>H<sub>2</sub> and C<sup>7''</sup>H), 0.87 (t, *J* 7.2 Hz, 3H, C<sup>8''</sup>H<sub>3</sub>);  $\delta_{\text{C}}$  (125.77 MHz, (CD<sub>3</sub>)<sub>2</sub>CO): 175.82 (C=O), 140.06 (C<sup>2</sup>), 135.73 (C<sup>3</sup>), 133.71 (C<sup>3''</sup>), 129.39 (C<sup>2''</sup>), 129.18 (C<sup>5'</sup>), 129.06 (C<sup>6'</sup>), 93.56 (OCH<sub>2</sub>O), 74.97 (C<sup>4</sup>), 74.14 (C<sup>1''</sup>), 54.82 (C<sup>5</sup>), 50.92 (CH<sub>3</sub>O), 50.61 (CO<sub>2</sub>CH<sub>3</sub>), 44.80 (C<sup>1</sup>), 32.88 (C<sup>7'</sup>), 32.15 (C<sup>2'</sup>), 31.17 (C<sup>5''</sup>), 30.62 (C<sup>4''</sup>), 28.46 (C<sup>6''</sup>), 26.45 (C<sup>4'</sup>), 24.69 (C<sup>3'</sup>), 22.26 (C<sup>7''</sup>), 13.44 (C<sup>8''</sup>); m/z (APCI): 393.1 (100%, [M-H]<sup>+</sup>).

## Compound 36

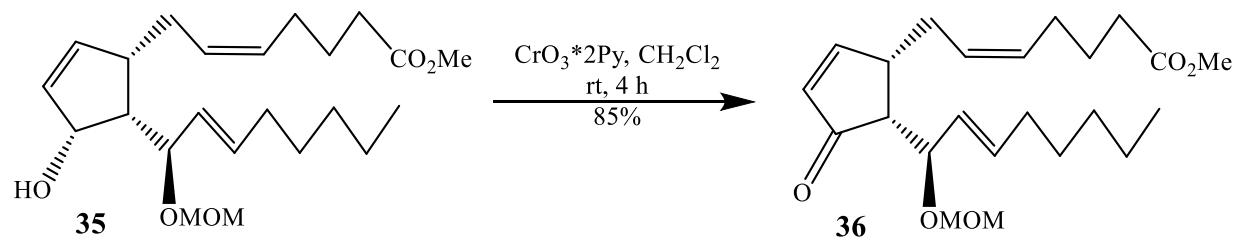

To a stirred solution of compound **35** (90 mg, 0.23 mmol) in DCM (10 mL) was added  $\text{CrO}_3 \cdot 2\text{Py}$  (110 mg, 0.46 mmol) at rt. The reaction was stirred for 4 h at the same temperature (monitored by TLC) and evaporated under reduced pressure. The residue was purified by column chromatography (5:1 petroleum ether/ethyl acetate as eluent) to afford *title compound* (76 mg, 85% yield) as a transparent colorless liquid; [Found: C, 70.12; H, 9.09.  $\text{C}_{23}\text{H}_{36}\text{O}_5$  requires C, 70.38; H, 9.24%];  $R_f$  (petroleum ether/ethyl acetate = 5:1) 0.5;  $[\alpha]_D^{20}$ : +60 ( $c$  0.9,  $\text{CH}_2\text{Cl}_2$ ); IR (liquid film)  $\nu_{\max}$ ,  $\text{cm}^{-1}$ : 2928, 2855, 1738, 1709, 1623, 1438, 1366, 1349, 1205, 1149, 1035, 978, 920, 811;  $\delta_{\text{H}}$  (500 MHz,  $(\text{CD}_3)_2\text{CO}$ ): 7.71 (dd,  $J$  5.8, 2.4 Hz, 1H,  $\text{C}^2\text{H}$ ), 6.08 (dd,  $J$  5.7, 2.2 Hz, 1H,  $\text{C}^3\text{H}$ ), 5.89 (dd,  $J$  15.5, 8.6 Hz, 1H,  $\text{C}^{2''}\text{H}$ ), 5.70-5.49 (m, 3H,  $\text{C}^{6'}\text{H}$ ,  $\text{C}^{5'}\text{H}$  and  $\text{C}^{3''}\text{H}$ ), 4.64 (d,  $J$  8.6 Hz, 1H,  $\text{OCH}_2\text{O}$ ), 4.47 (d,  $J$  8.6 Hz, 1H,  $\text{OCH}_2\text{O}$ ), 4.42 (dd,  $J$  8.7, 2.5 Hz, 1H,  $\text{C}^{1''}\text{H}$ ), 3.61 (s, 3H,  $\text{CO}_2\text{CH}_3$ ), 3.29 (s, 3H,  $\text{CH}_3\text{O}$ ), 3.13-3.07 (m, 1H,  $\text{C}^1\text{H}$ ), 2.59-2.52 (m, 2H,  $\text{C}^{7'}\text{H}$  and  $\text{C}^{5'}\text{H}$ ), 2.31 (t,  $J$  7.7 Hz, 3H,  $\text{C}^{2'}\text{H}_2$  and  $\text{C}^{7'}\text{H}$ ), 2.12 (q,  $J$  7.4 Hz, 1H,  $\text{C}^{4''}\text{H}$ ), 2.08-2.03 (m, 3H,  $\text{C}^{4''}\text{H}$  and  $\text{C}^{4'}\text{H}_2$ ), 1.67 (quint,  $J$  7.5 Hz, 2H,  $\text{C}^{3'}\text{H}_2$ ), 1.39 (quint,  $J$  7.3 Hz, 2H,  $\text{C}^{5''}\text{H}_2$ ), 1.36-1.25 (m, 4H,  $\text{C}^{6''}\text{H}_2$  and  $\text{C}^{7''}\text{H}_2$ ), 0.88 (t,  $J$  7.0 Hz, 3H,  $\text{C}^{8''}\text{H}_3$ );  $\delta_{\text{C}}$  (125.77 MHz,  $(\text{CD}_3)_2\text{CO}$ ): 207.51 ( $\text{C}^4$ ), 173.05 ( $\text{C}=\text{O}$ ), 166.44 ( $\text{C}^2$ ), 134.28 ( $\text{C}^{3''}$ ), 133.25 ( $\text{C}^3$ ), 130.56 ( $\text{C}^{5'}$ ), 128.62 ( $\text{C}^{2''}$ ), 128.55 ( $\text{C}^{6'}$ ), 93.62 ( $\text{OCH}_2\text{O}$ ), 76.46 ( $\text{C}^{1''}$ ), 55.26 ( $\text{C}^5$ ), 52.50 ( $\text{CH}_3\text{O}$ ), 50.62 ( $\text{CO}_2\text{CH}_3$ ), 44.78 ( $\text{C}^1$ ), 32.88 ( $\text{C}^{7'}$ ), 31.89 ( $\text{C}^{2'}$ ), 31.13 ( $\text{C}^{5''}$ ), 28.66 ( $\text{C}^{4''}$ ), 27.42 ( $\text{C}^{6''}$ ), 26.57 ( $\text{C}^{4'}$ ), 24.65 ( $\text{C}^{3'}$ ), 22.23 ( $\text{C}^{7''}$ ), 13.41 ( $\text{C}^{8''}$ );  $m/z$  (APCI): 331.2 (100%,  $[\text{M}-\text{MOMO}]^+$ ).

## Compound 2

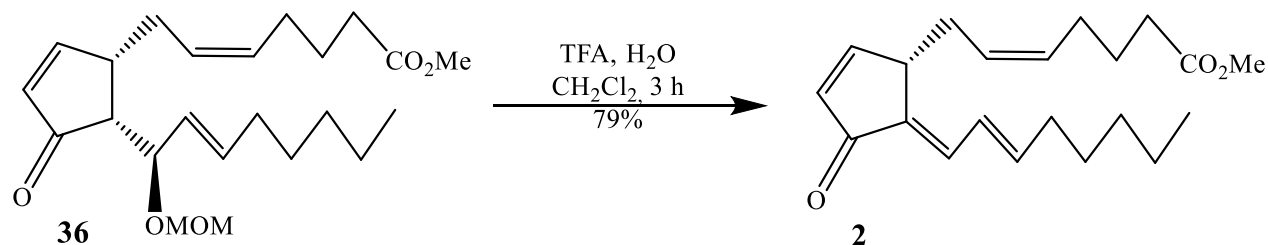

To a stirred solution of compound **36** (76 mg, 0.19 mmol) in DCM (10 mL) was added 9:1-mixture of TFA-H<sub>2</sub>O (0.1 mL) at rt. The reaction was stirred for 3 h at the same temperature (monitored by TLC), then cooled to 0 °C and neutralized by addition of saturated solution of NaHCO<sub>3</sub>. The resulting mixture was extracted with DCM (3×30 mL), the combined organic layers were dried (MgSO<sub>4</sub>) and the solvent was evaporated under reduced pressure. The residue was purified by column chromatography (5:1 petroleum ether/ethyl acetate as eluent) to afford *title compound* (50 mg, 79% yield) as a transparent colorless liquid; [Found: C, 76.19; H, 8.99. C<sub>21</sub>H<sub>30</sub>O<sub>3</sub> requires C, 76.33; H, 9.15%]; R<sub>f</sub> (petroleum ether/ethyl acetate = 5:1) 0.3; [α]<sub>D</sub><sup>20</sup>: +138.7 (*c* 0.75, CH<sub>2</sub>Cl<sub>2</sub>); IR (liquid film)  $\nu_{\text{max}}$ , cm<sup>-1</sup>: 2955, 2926, 2858, 1739, 1692, 1631, 1437, 1362, 1349, 1151, 1035, 978, 809; δ<sub>H</sub> (500 MHz, (CD<sub>3</sub>)<sub>2</sub>CO): 7.61 (dd, *J* 5.9, 1.9 Hz, 1H, C<sup>2</sup>H), 6.82 (d, *J* 11.7 Hz, 1H, C<sup>1''</sup>H), 6.50 (t, *J* 14.6 Hz, 1H, C<sup>3</sup>H), 6.31 (t, *J* 7.1 Hz, 1H, C<sup>2''</sup>H), 6.29-6.25 (m, 1H, C<sup>3''</sup>H), 5.48-5.39 (m, 1H, C<sup>5</sup>H) 5.38-5.32 (m, 1H, C<sup>6</sup>H) 3.70 (br.s, 1H, C<sup>1</sup>H), 3.60 (s, 3H, CO<sub>2</sub>CH<sub>3</sub>), 2.65 (dt, *J* 14.5, 5.1 Hz, 1H, C<sup>7</sup>H), 2.39 (dt, *J* 14.5, 8.2 Hz, 1H, C<sup>7</sup>H), 2.28 (t, *J* 7.3 Hz, 2H, C<sup>2</sup>H<sub>2</sub>), 2.25 (q, *J* 7.4 Hz, 2H, C<sup>4''</sup>H<sub>2</sub>), 2.09-1.98 (m, 2H, C<sup>4</sup>H<sub>2</sub>), 1.61 (quint, *J* 7.3 Hz, 2H, C<sup>3</sup>H<sub>2</sub>), 1.48 (quint, *J* 7.0 Hz, 2H, C<sup>5''</sup>H<sub>2</sub>), 1.39-1.25 (m, 4H, C<sup>6''</sup>H<sub>2</sub> and C<sup>7''</sup>H<sub>2</sub>), 0.89 (t, *J* 6.6 Hz, 3H, C<sup>8''</sup>H<sub>3</sub>); δ<sub>C</sub> (125.77 MHz, (CD<sub>3</sub>)<sub>2</sub>CO): 195.79 (C<sup>4</sup>), 173.03 (C=O), 160.79 (C<sup>2</sup>), 145.70 (C<sup>5</sup>), 135.61 (C<sup>3''</sup>), 134.73 (C<sup>1''</sup>), 131.25 (C<sup>3</sup>), 130.26 (C<sup>5</sup>), 126.07 (C<sup>6</sup>), 125.87 (C<sup>2''</sup>), 50.59 (CH<sub>3</sub>O), 43.21 (C<sup>1</sup>), 33.00 (C<sup>7</sup>), 32.85 (C<sup>2</sup>), 31.24 (C<sup>5''</sup>), 30.36 (C<sup>4''</sup>), 28.39 (C<sup>6''</sup>), 26.40 (C<sup>4</sup>), 24.66 (C<sup>3</sup>), 22.23 (C<sup>7''</sup>), 13.37 (C<sup>8''</sup>); *m/z* (APCI): 331.2 (100%, [MH]<sup>+</sup>).

### 3. NMR Spectra of New Compounds

Sp-1172 Gimazetdinov Pc-397(2) 36mg in Acetone, <sup>1</sup>H AV500 21.06.2018 LAN  
 SW (1H)=19.99ppm; O1 (1H)=7.00ppm; Obs.Freq.:500.13MHz; D1=2.0s; T=295.5K; Probe:BBO; Exp.Time: 7 sec; TimesDate: 11:57:40 21 Jun 2018.

Ufa Institute of Chemistry of the Russian Academy of Sciences (UTC RAS). 2018

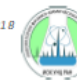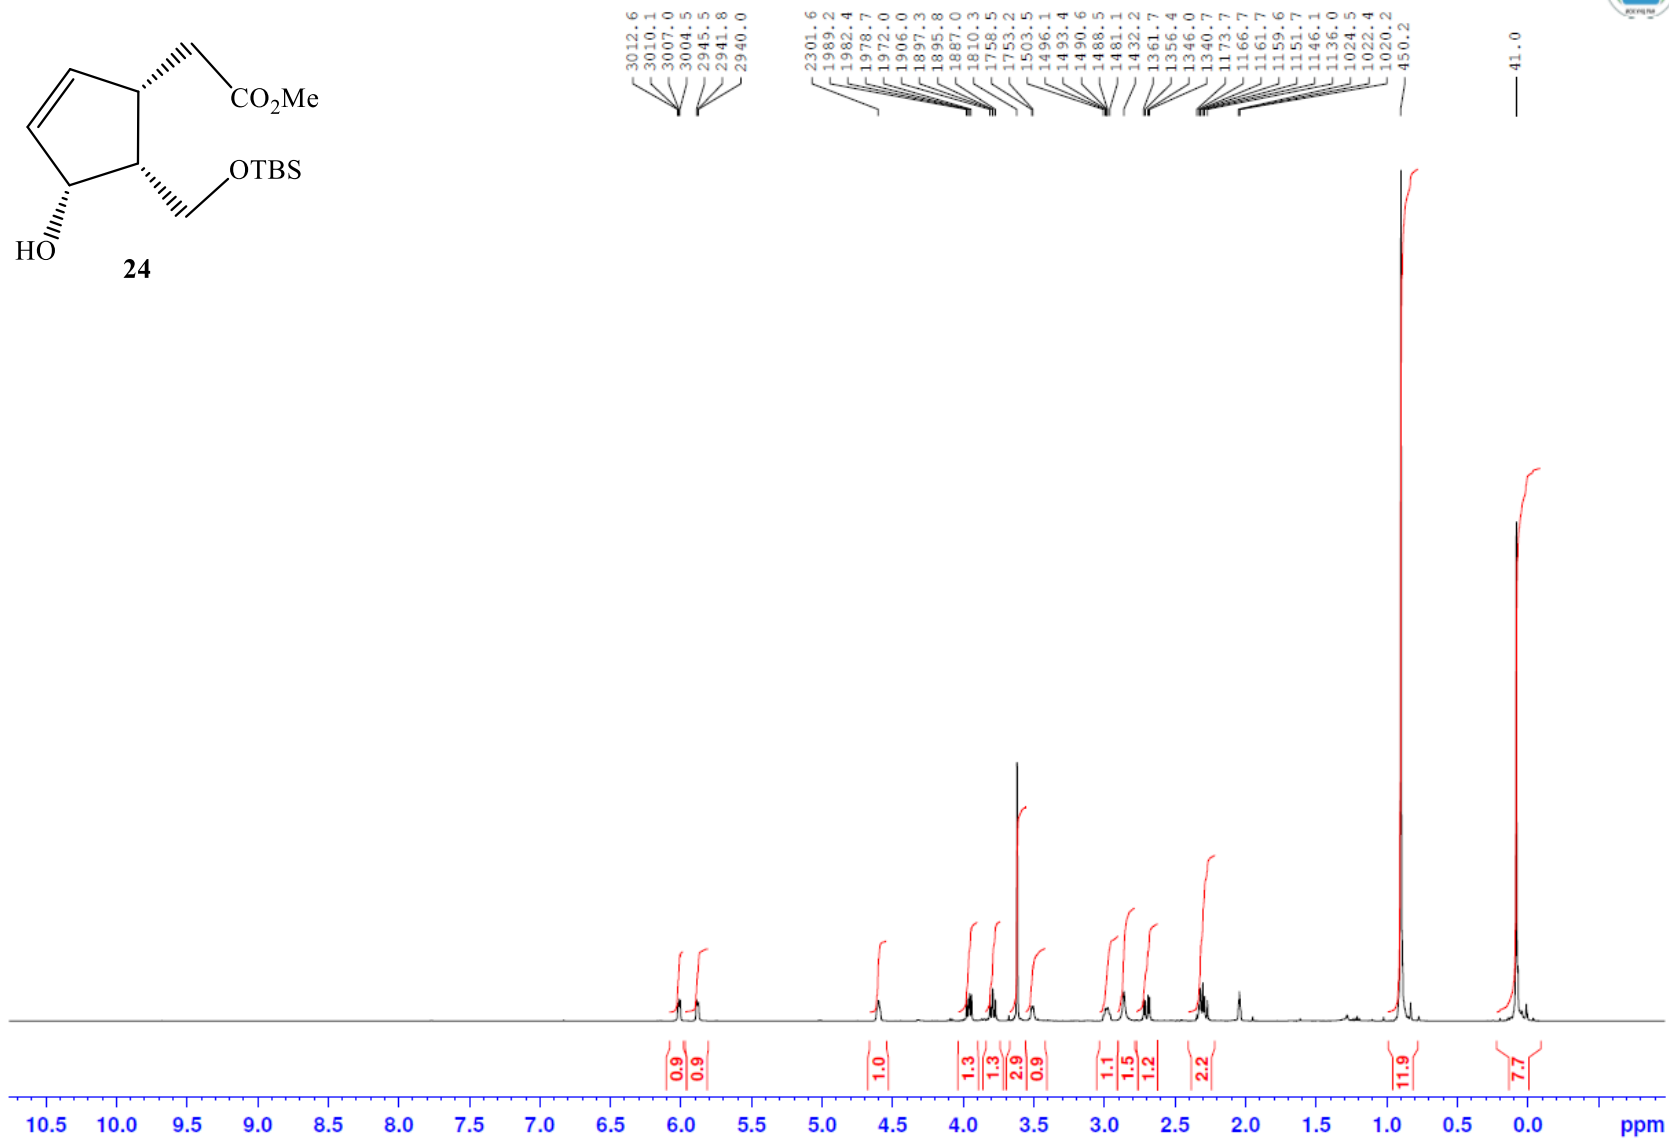

Figure. S1 <sup>1</sup>H NMR spectrum of **24** (d-acetone, 500 MHz)

Sp-1172 Gimazetdinov Pc-397(2) 36mg in Acetone,  $^{13}\text{C}\{^1\text{H}\}$  dept135 AV500 21.06.2018 LAN

Ufa Institute of Chemistry of the Russian Academy of Sciences (UIC RAS). 2018

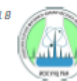

SW(13C)=236.63ppm; OI(13C)=110.00ppm; Obs.Freq.:125.76MHz; D1=1.0s; T=296.1K; Probe:BB0; Exp.Time: 2 min 36 sec; TimesDate: 12:07:23 21 Jun 2018.

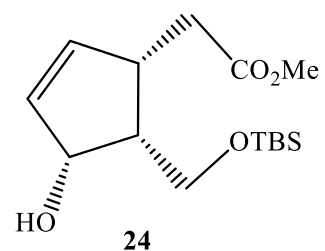

137.89  
133.76  
74.91  
59.95  
50.65  
47.26  
41.68  
36.03  
25.37

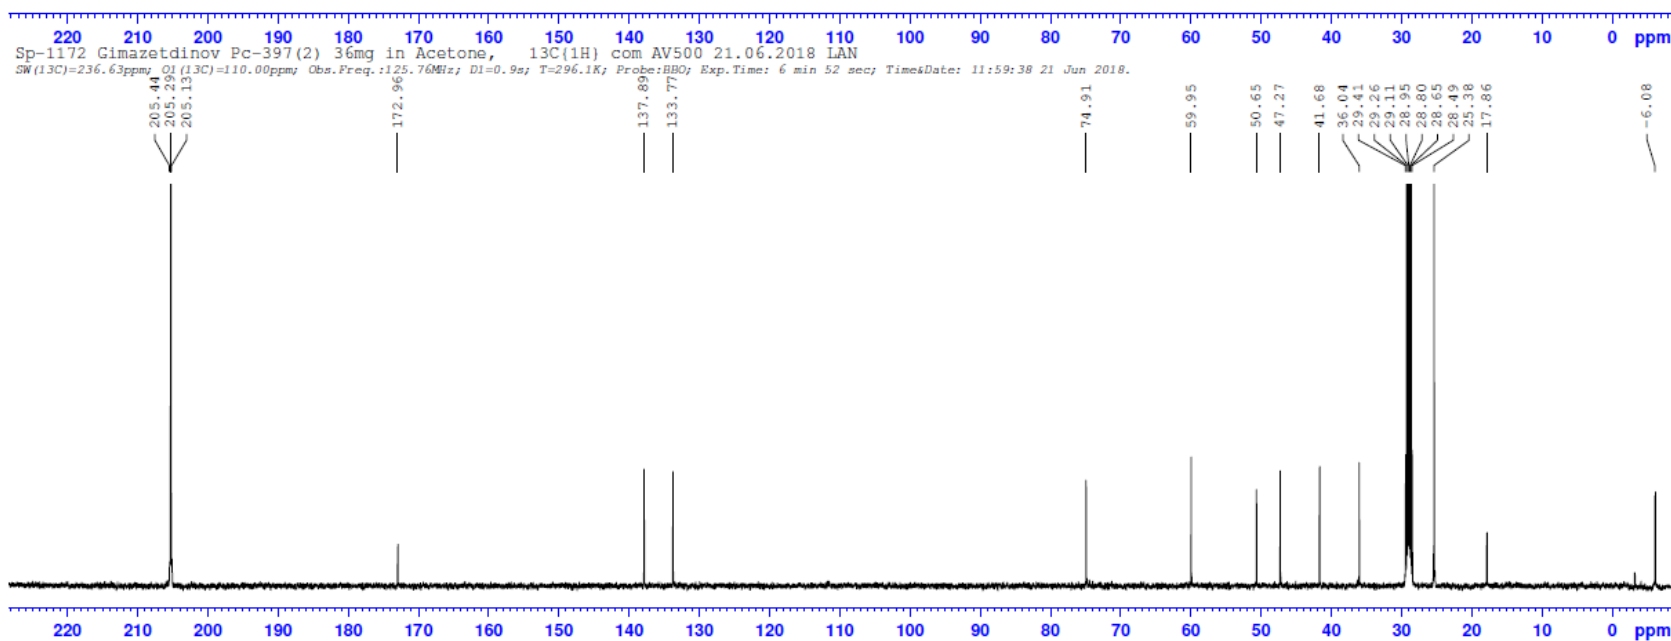

Figure. S2  $^{13}\text{C}$  NMR spectrum of **24** (*d*-acetone, 125.77 MHz)

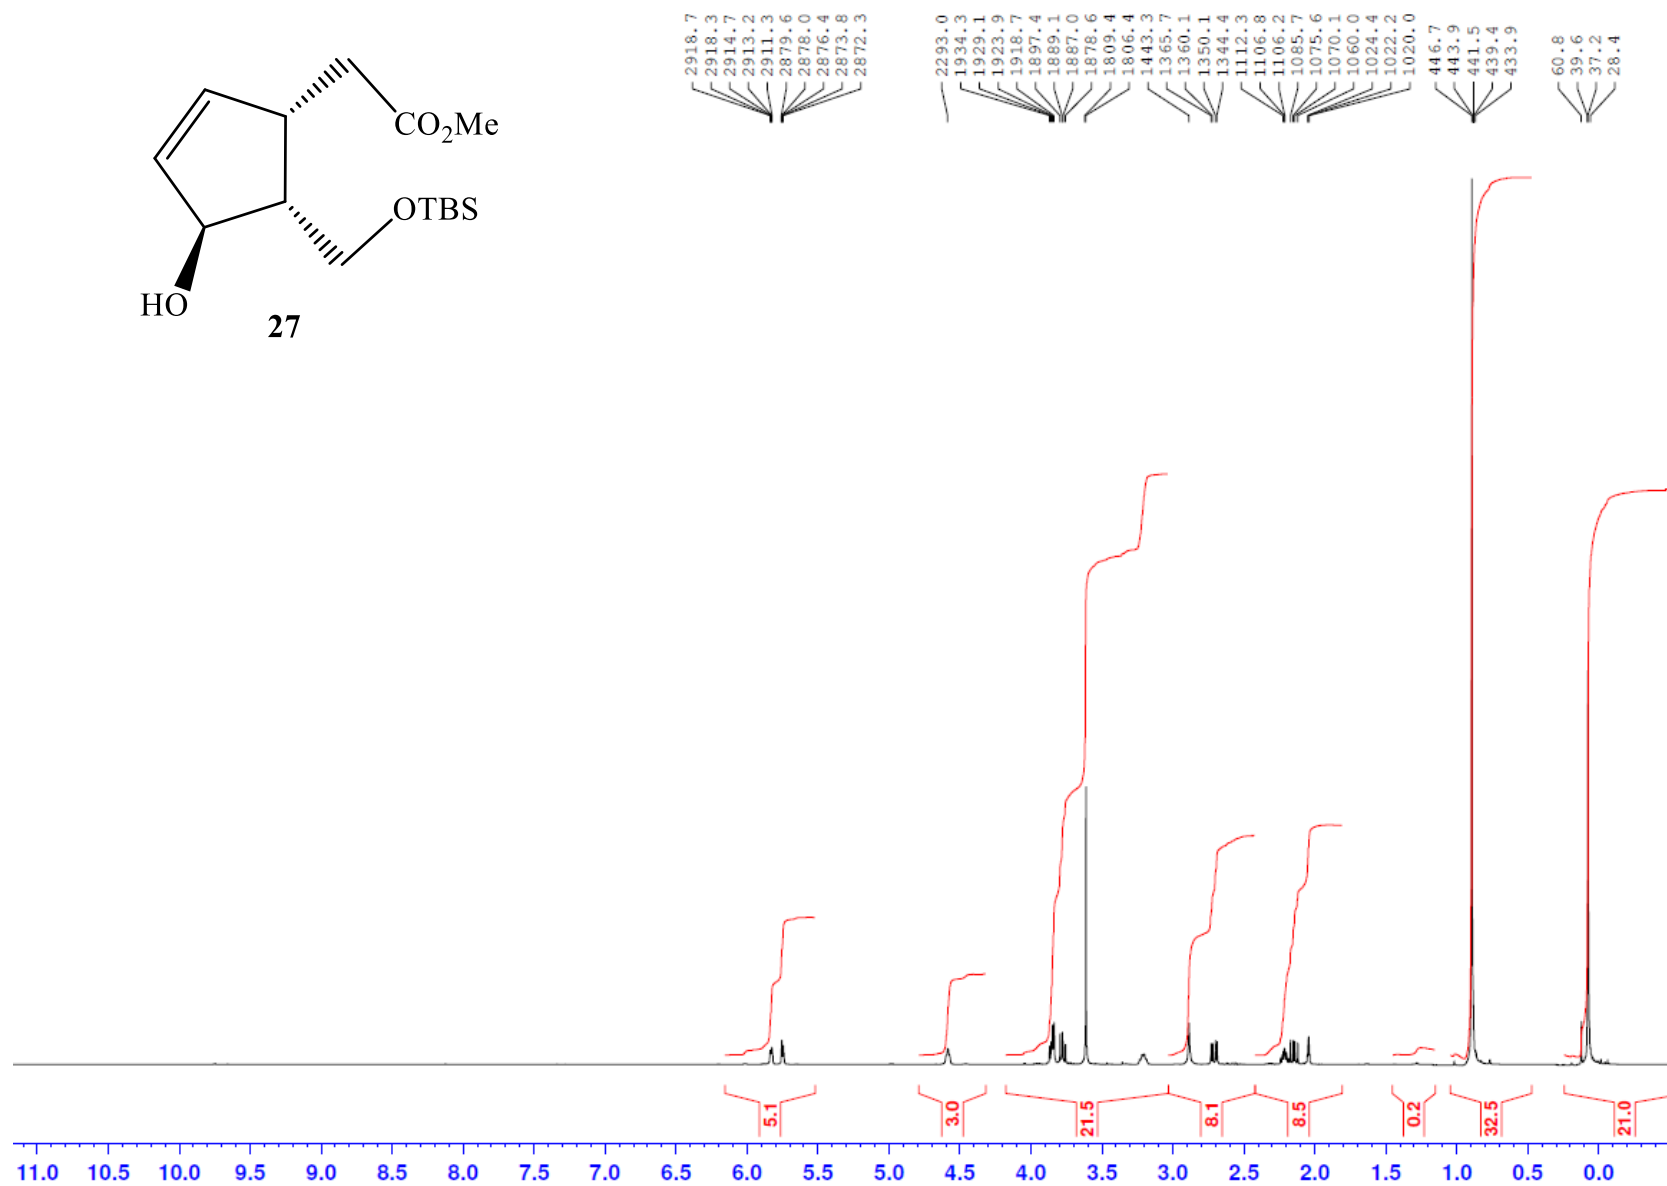

**Figure. S3** <sup>1</sup>H NMR spectrum of **27** (*d*-acetone, 500 MHz)

Sp-283 Gimazetdinov Pc-437-1 25mg in CDCl<sub>3</sub>, <sup>13</sup>C{<sup>1</sup>H} dept90 AV500 09.01.2019 PAI  
 SW(13C)=236.63ppm; O1(13C)=110.00ppm; Obs.Freq.:125.76MHz; D1=1.0s; T=292.1K; Probe:BBO; Exp.Time: 4 min 45 sec; TimesDate: 12:32:55 09 Jan 2019.

Ufa Institute of Chemistry of the Russian Academy of Sciences (UIC RAS). 2019

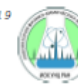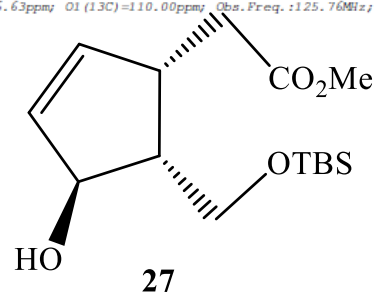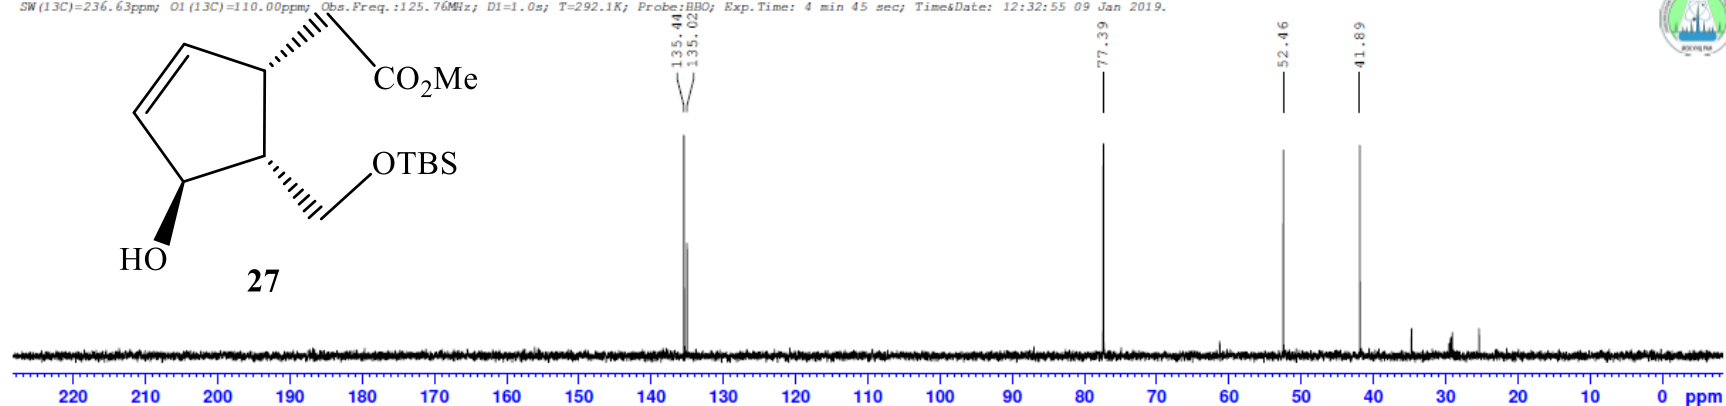

Sp-283 Gimazetdinov Pc-437-1 25mg in Acetone, <sup>13</sup>C{<sup>1</sup>H} dept135 AV500 09.01.2019 PAI

SW(13C)=236.63ppm; O1(13C)=110.00ppm; Obs.Freq.:125.76MHz; D1=1.0s; T=292.2K; Probe:BBO; Exp.Time: 4 min 45 sec; TimesDate: 12:28:07 09 Jan 2019.

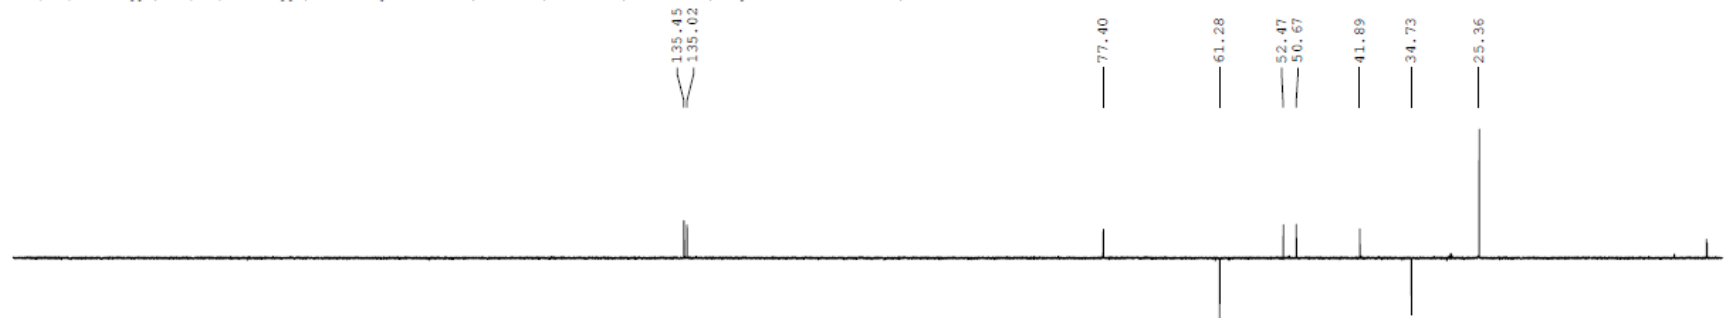

Sp-283 Gimazetdinov Pc-437-1 25mg in Acetone, <sup>13</sup>C{<sup>1</sup>H} com AV500 09.01.2019 PAI

SW(13C)=236.63ppm; O1(13C)=110.00ppm; Obs.Freq.:125.76MHz; D1=0.9s; T=292.3K; Probe:BBO; Exp.Time:17 min 46 sec; TimesDate: 12:10:06 09 Jan 2019.

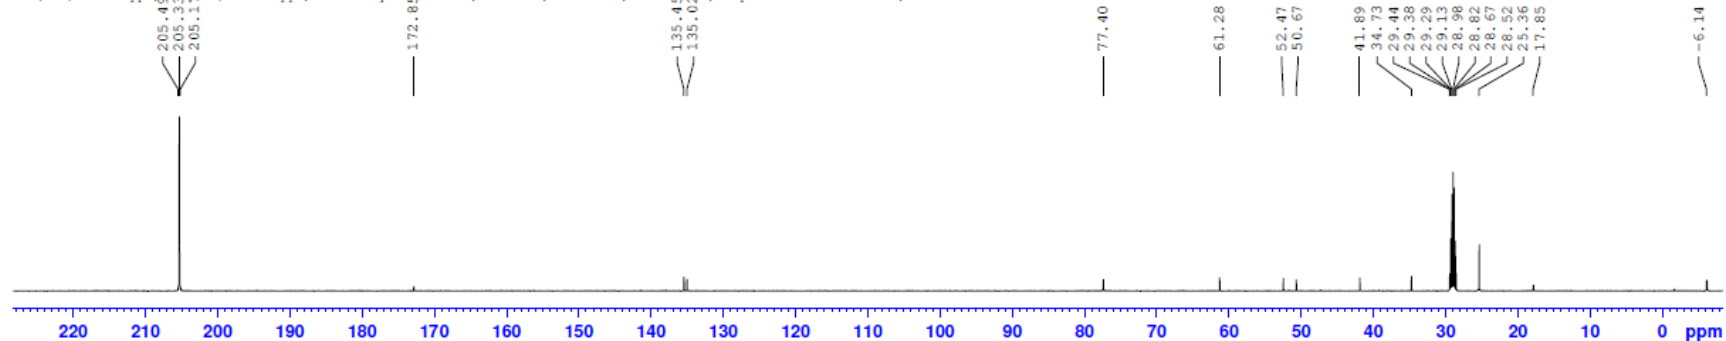

**Figure. S4** <sup>13</sup>C NMR spectrum of **27** (*d*-acetone, 125.77 MHz)

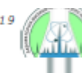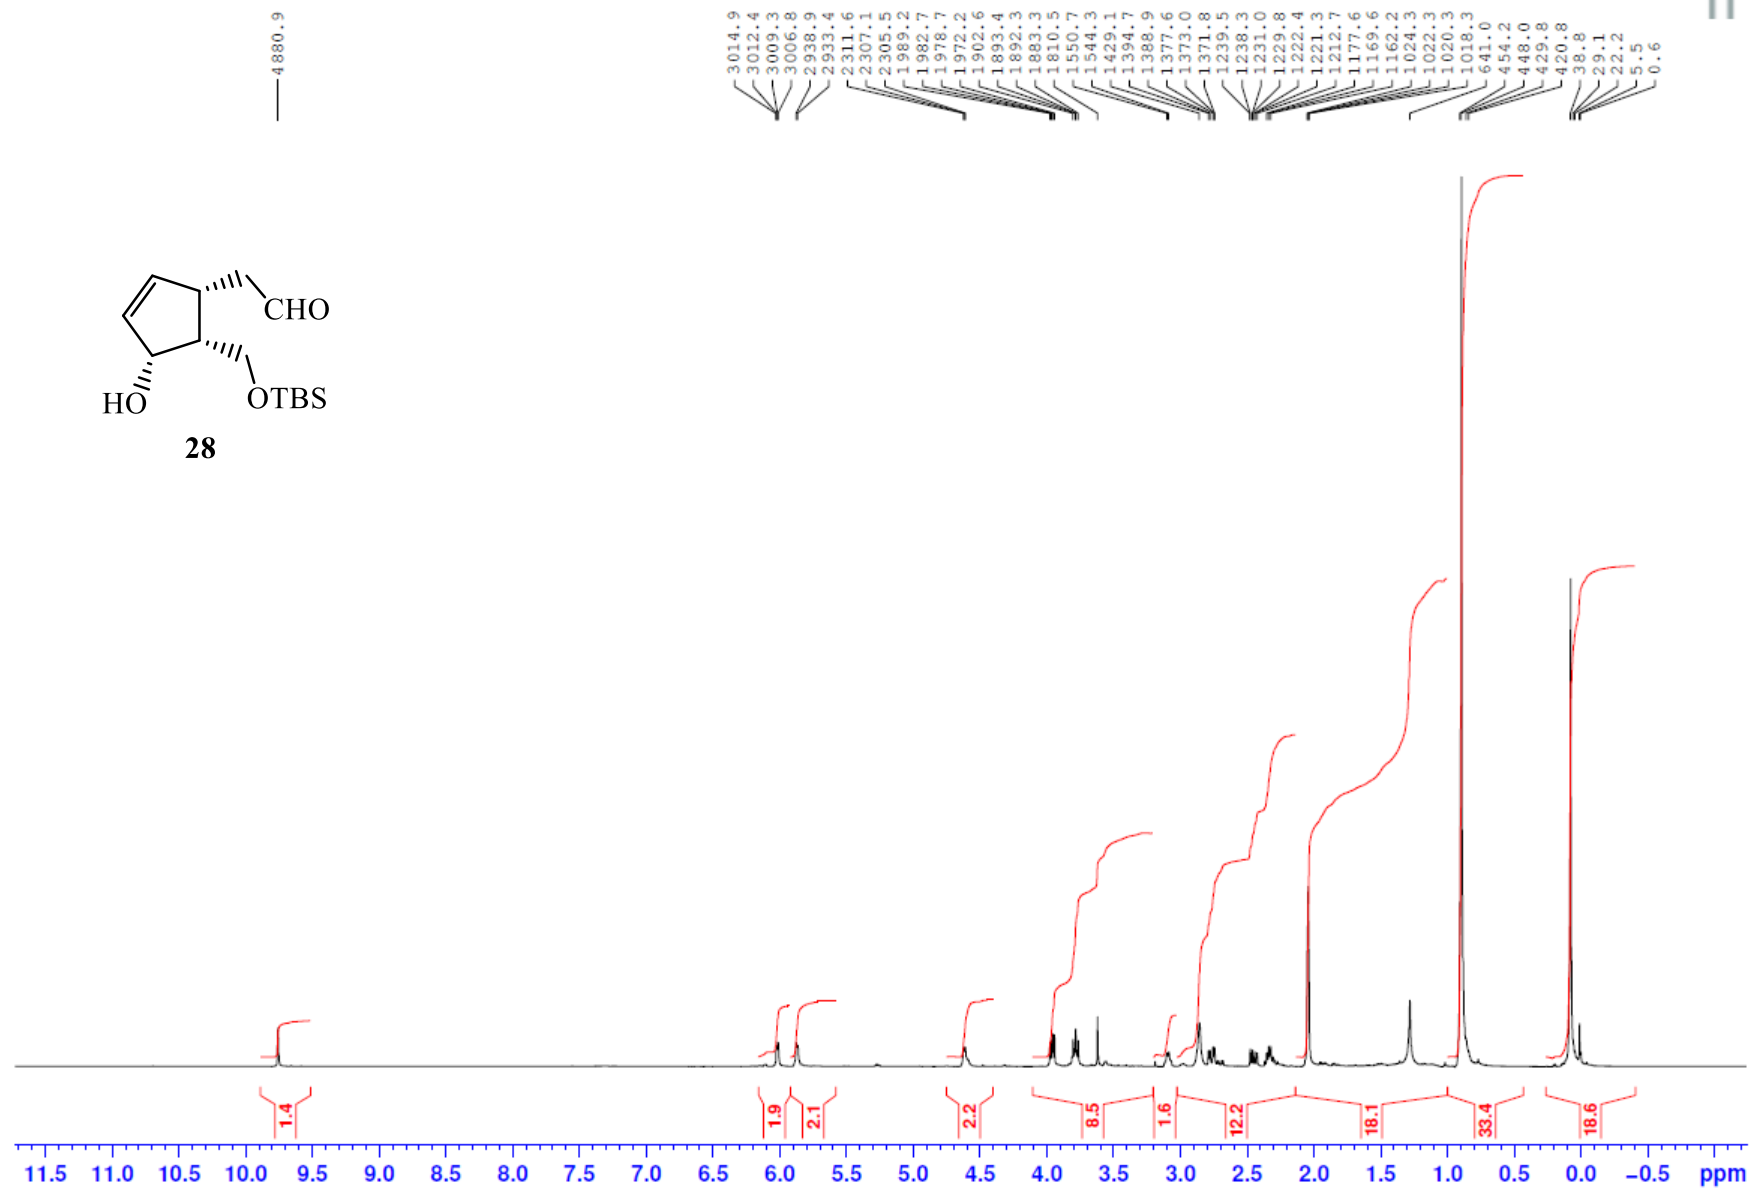

Figure. S5  $^1\text{H}$  NMR spectrum of **28** (*d*-acetone, 500 MHz)

Sp-597 Gimazetdinov Pc-509 25mg in Acetone,  $^{13}\text{C}\{^1\text{H}\}$  dept135 AV500 22.10.2019 LAN

Ufa Institute of Chemistry of the Russian Academy of Sciences (UIC RAS). 2019

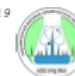

SW( $^{13}\text{C}$ )=236.63ppm; O1( $^{13}\text{C}$ )=110.00ppm; Obs.Freq.:125.76MHz; D1=1.0s; T=299.6K; Probe:BBO; Exp.Time: 2 min 27 sec; Time&Date: 15:51:58 22 Oct 2019.

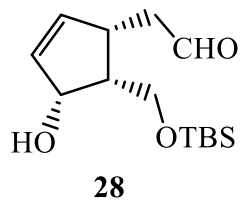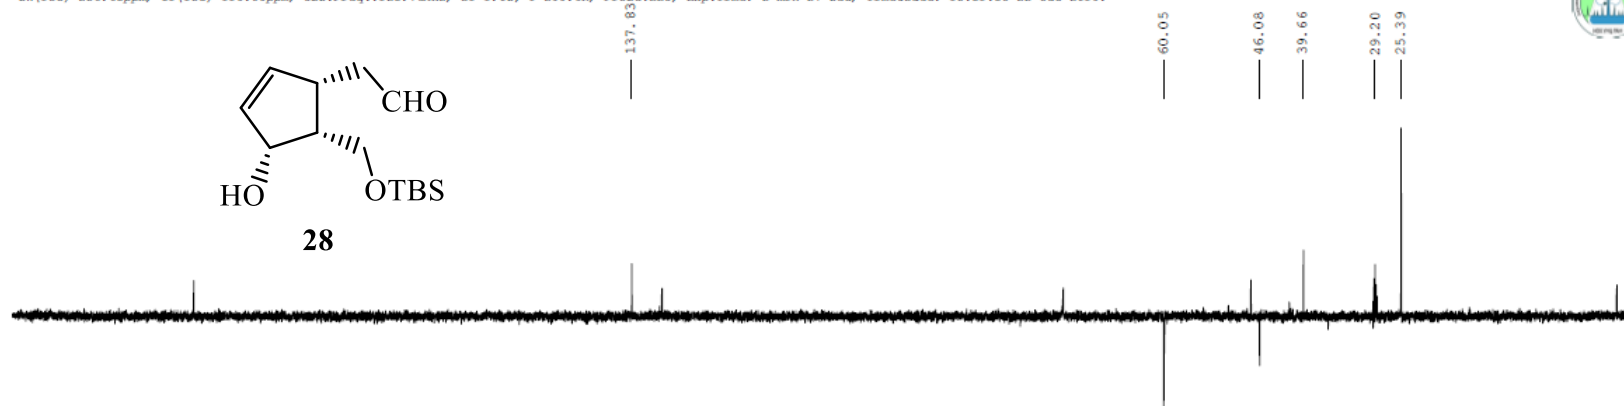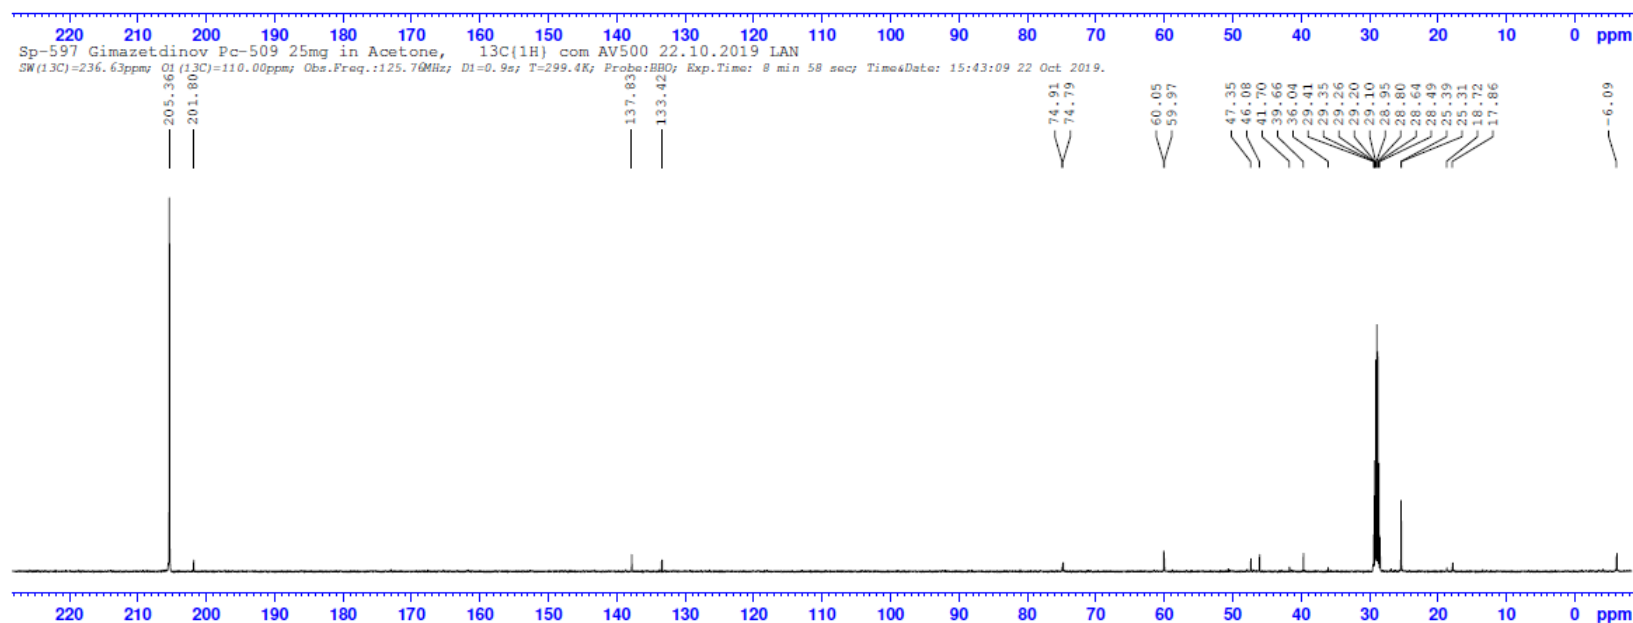

**Figure. S6**  $^{13}\text{C}$  NMR spectrum of **28** (*d*-acetone, 125.77 MHz)

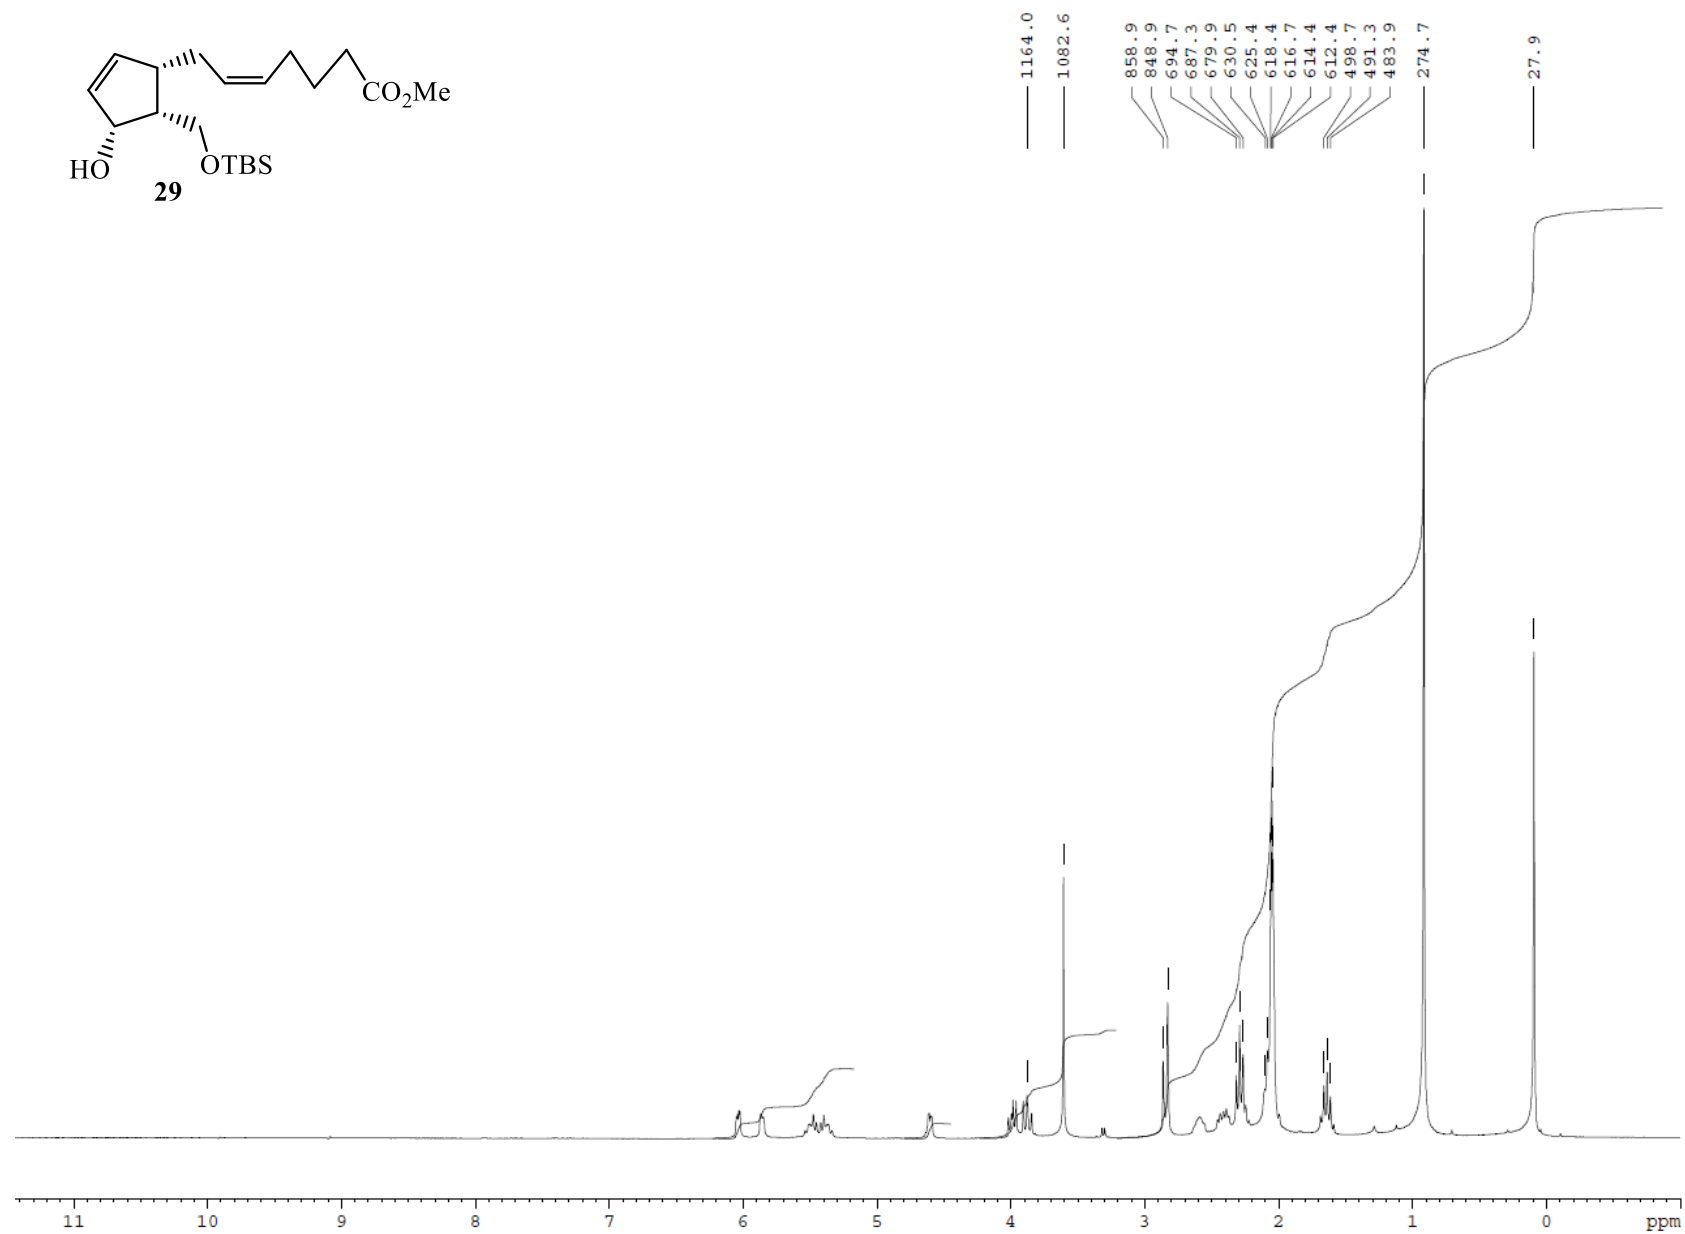

**Figure. S7**  $^1\text{H}$  NMR spectrum of **29** ( $d$ -acetone, 500 MHz)

Sp-714 Almuhametov Pca-148-3-dept 13mg in Acetone,  $^{13}\text{C}\{^1\text{H}\}$  dept135 AV500 23.01.2020 BIP

Ufa Institute of Chemistry of the Russian Academy of Sciences (UIC RAS). 2020

SW(13C)=236.63ppm; O1(13C)=110.00ppm; Obs.Freq.:125.76MHz; D1=1.0s; T=298.8K; Probe:BBO; Exp.Time: 4 min 45 sec; Time&Date: 11:04:42 23 Jan 2020.

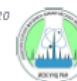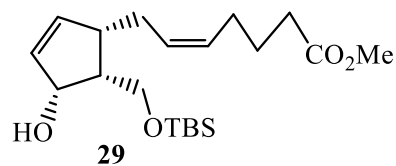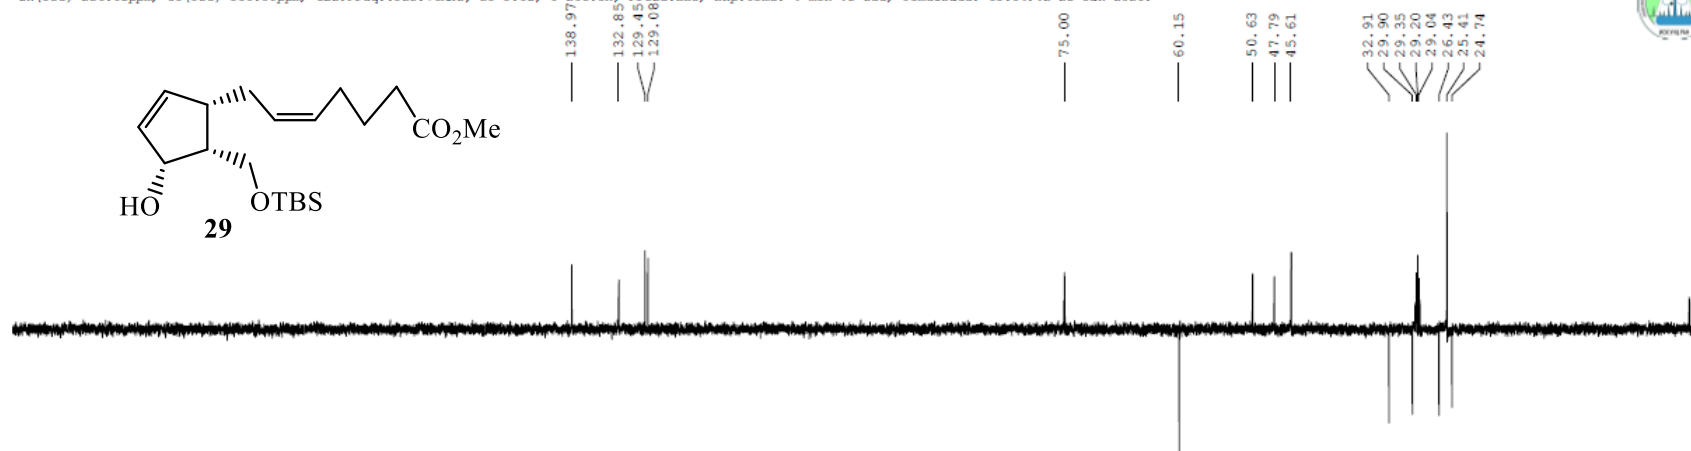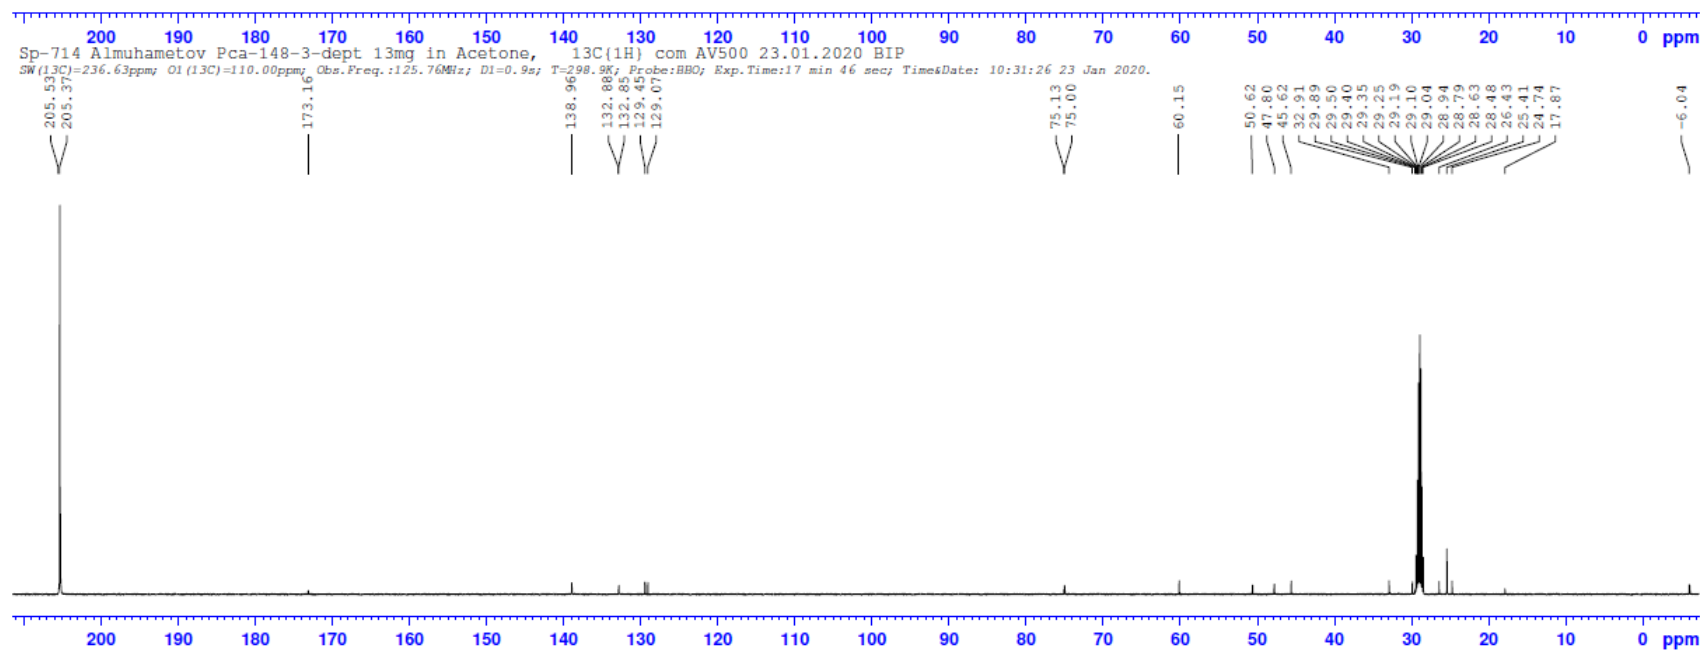

Figure. S8  $^{13}\text{C}$  NMR spectrum of **29** (*d*-acetone, 125.77 MHz)

Sp-680 Gimazetdinov Pc-476\_1\_0 25mg in Acetone, 1H AV500 26.04.2019 NTR

SW (1H)=19.99ppm; O1 (1H)=7.00ppm; Obs. Freq.: 500.13MHz; D1=2.0s; T=299.2K; Probe:BB0; Exp.Time: 7 sec; Time&Date: 10:57:56 26 Apr 2019.

Ufa Institute of Chemistry of the Russian Academy of Sciences (UIC RAS). 2019

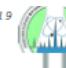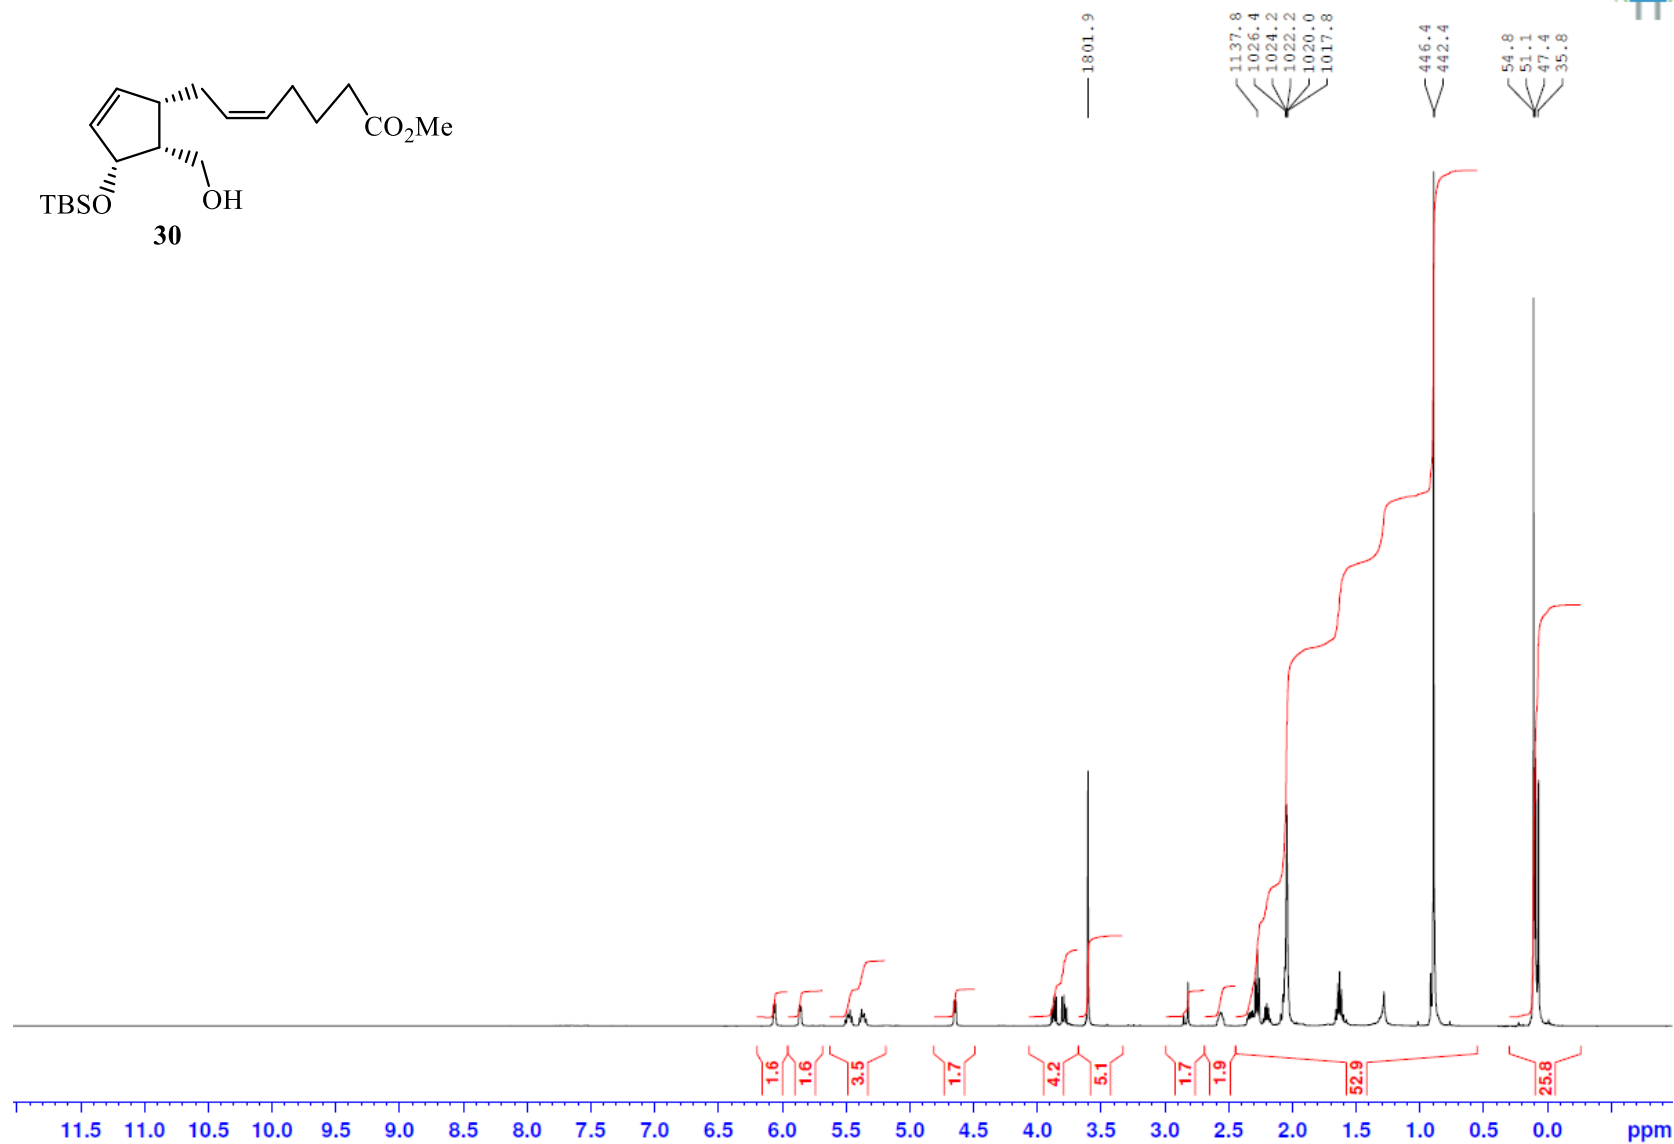

Sp-680 Gimazetdinov Pc-476\_1\_0 25mg in Acetone,  $^{13}\text{C}\{^1\text{H}\}$  dept135 AV500 26.04.2019 NTR

Ufa Institute of Chemistry of the Russian Academy of Sciences (UTC RAS), 2019

SW (13C)=236.63ppm; O1 (13C)=110.00ppm; Obs.Freq.:125.76MHz; D1=1.0s; T=299.5K; Probe:BBQ; Exp.Time: 2 min 27 sec; TimesDate: 11:00:33 26 Apr 2019.

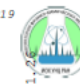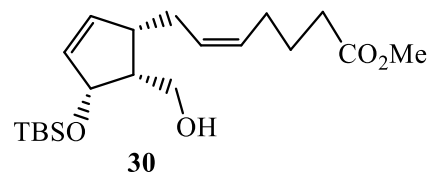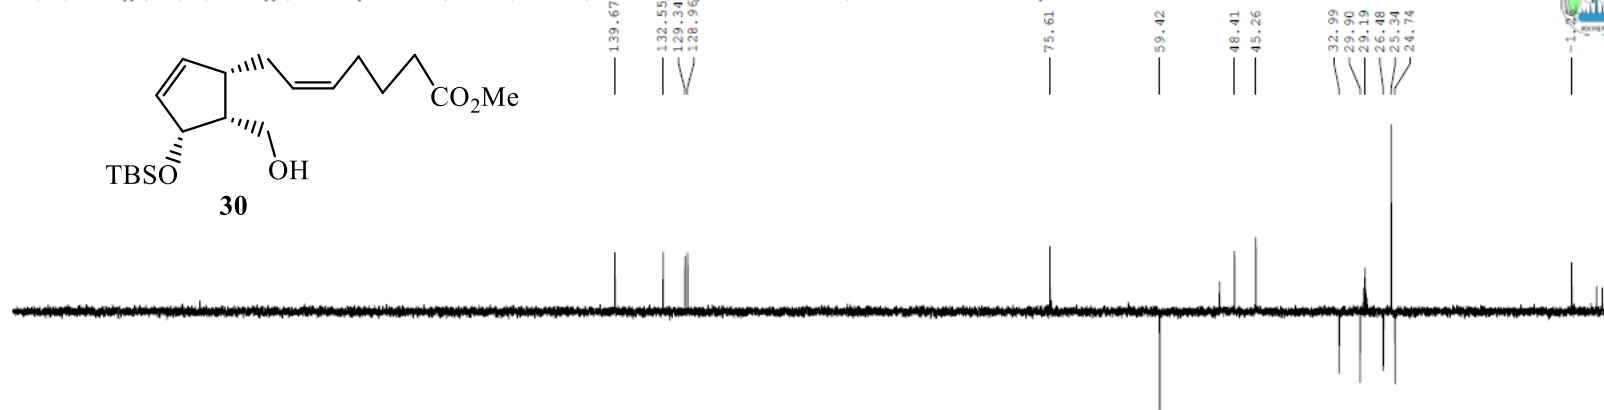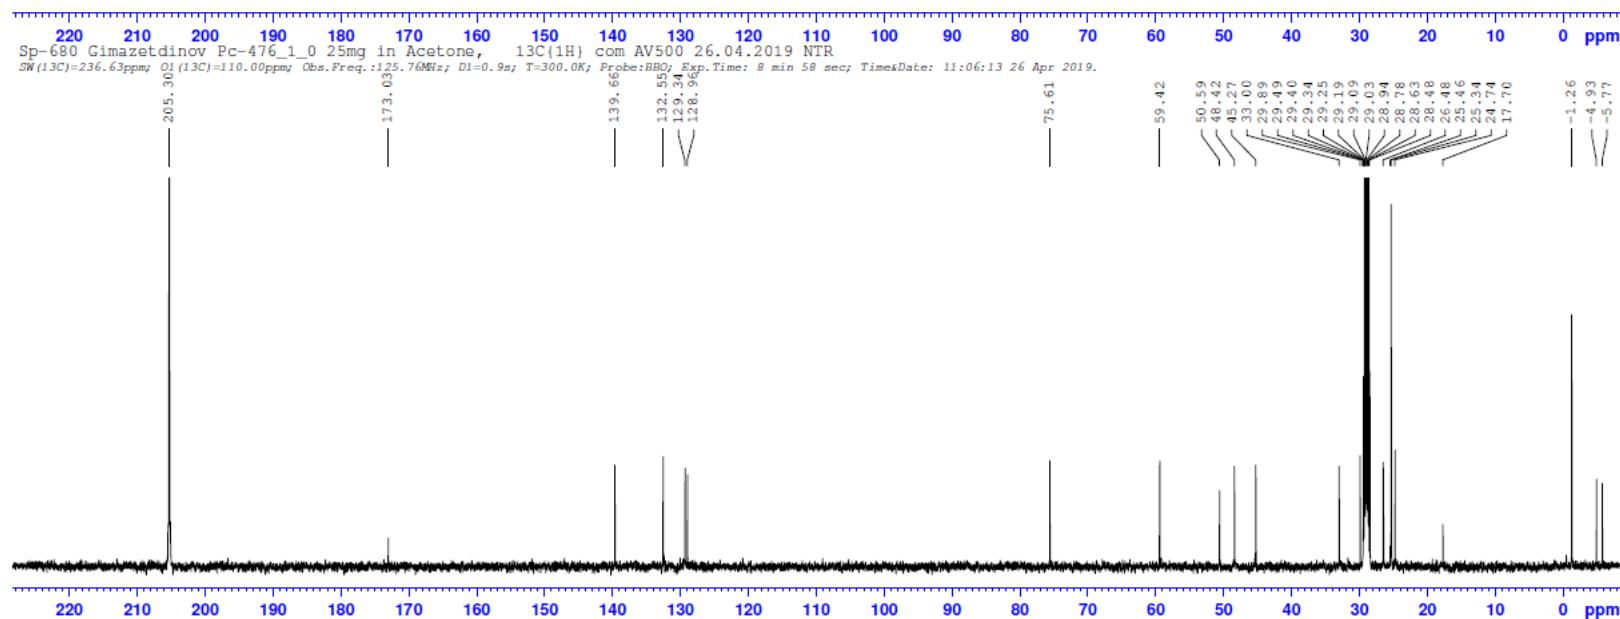

Figure. S10  $^{13}\text{C}$  NMR spectrum of **30** (*d*-acetone, 125.77 MHz)

# Pc-515

04.03.2020 12:33:20

|                        |                                                      |                      |                                                                           |                        |          |
|------------------------|------------------------------------------------------|----------------------|---------------------------------------------------------------------------|------------------------|----------|
| Acquisition Time (sec) | 3.2768                                               | Comment              | Sp-145 Gimazetdinov Pc-515-dept 15mg in Acetone, 1H, AV500 29.10.2019 SSH |                        |          |
| Date                   | 29 Oct 2019 08:27:44                                 | Date Stamp           | 29 Oct 2019 08:27:44                                                      |                        |          |
| File Name              | E:\текучее\gnb-Pc-515-dept\gnb-Pc-515-dept_001000fid | Frequency (MHz)      | 500.13                                                                    | Nucleus                | 1H       |
| Number of Transients   | 1                                                    | Origin               | spect                                                                     | Owner                  | nmr      |
| Points Count           | 32768                                                | Pulse Sequence       | zg                                                                        | Receiver Gain          | 52.29    |
| Solvent                | Acetone                                              | Spectrum Offset (Hz) | 3488.4607                                                                 | SW(cyclical) (Hz)      | 10000.00 |
|                        |                                                      | Sweep Width (Hz)     | 9999.70                                                                   | Temperature (degree C) | 25.629   |

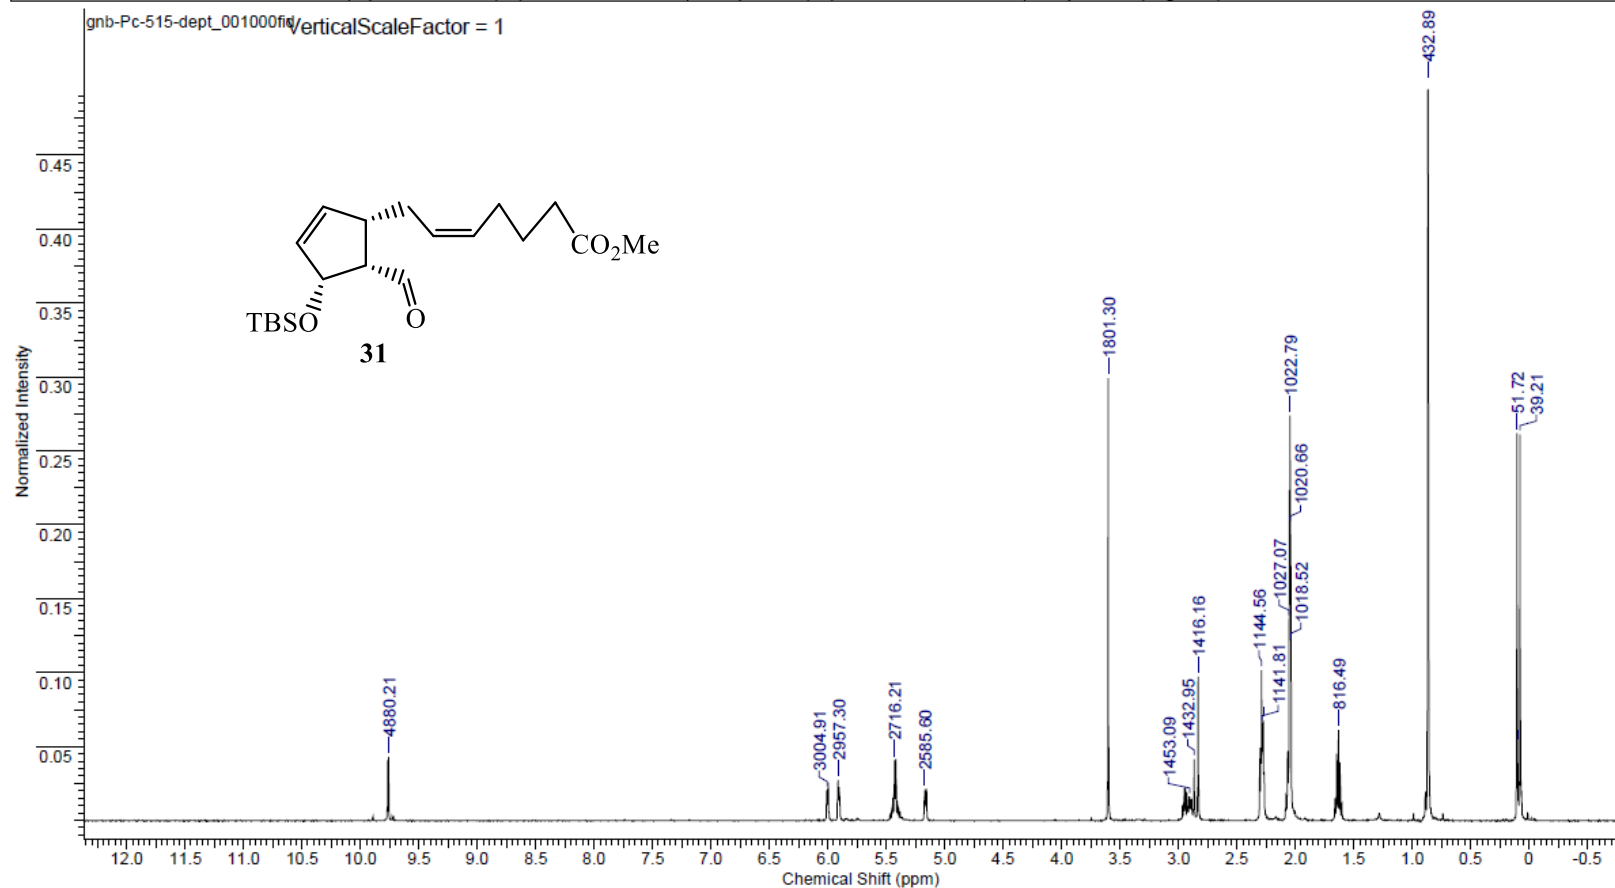

**Figure. S11**  $^1\text{H}$  NMR spectrum of **31** (*d*-acetone, 500 MHz)

Sp-145 Gimazetdinov Pc-515-dept 15mg in Acetone,  $^{13}\text{C}(1\text{H})$  dept135 AV500 29.10.2019 SSH

Ufa Institute of Chemistry of the Russian Academy of Sciences (UIC RAS). 2019

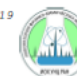

SW(13C)=236.63ppm; OI(13C)=110.00ppm; Obs.Freq.:125.76MHz; D1=1.0s; T=299.2K; Probe:BBO; Exp.Time: 9 min 20 sec; TimesDate: 14:07:35 29 Oct 2019.

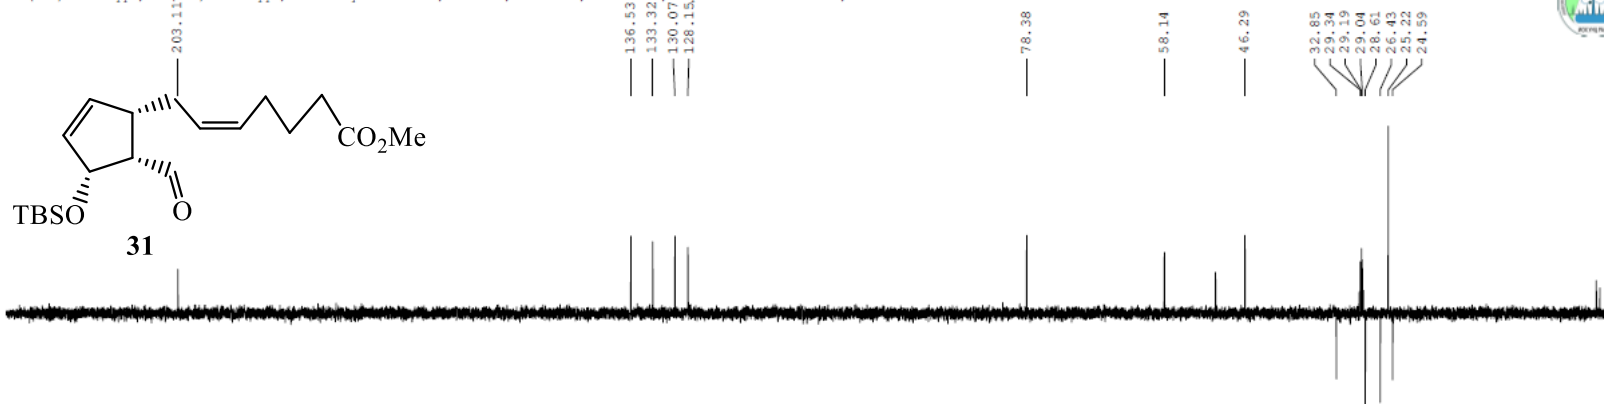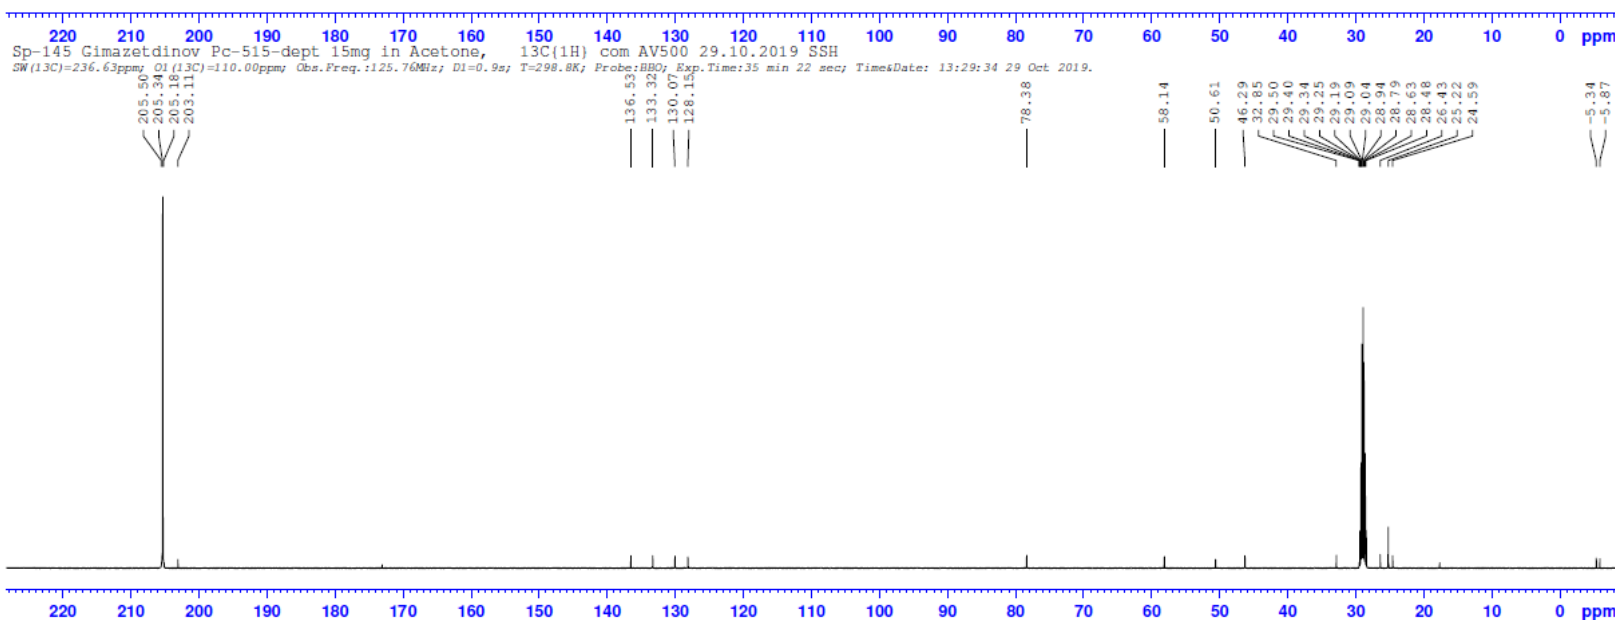

Figure. S12  $^{13}\text{C}$  NMR spectrum of **31** (*d*-acetone, 125.77 MHz)

FW(1H)=19.99ppm; OI(1H)=7.00ppm; Obs.Freq.:500.13MHz; D1=2.0s; T=300.2K; Probe:BBQ; Exp.Time:49 sec; TimesDate: 18:15:56 04 Oct 2019.

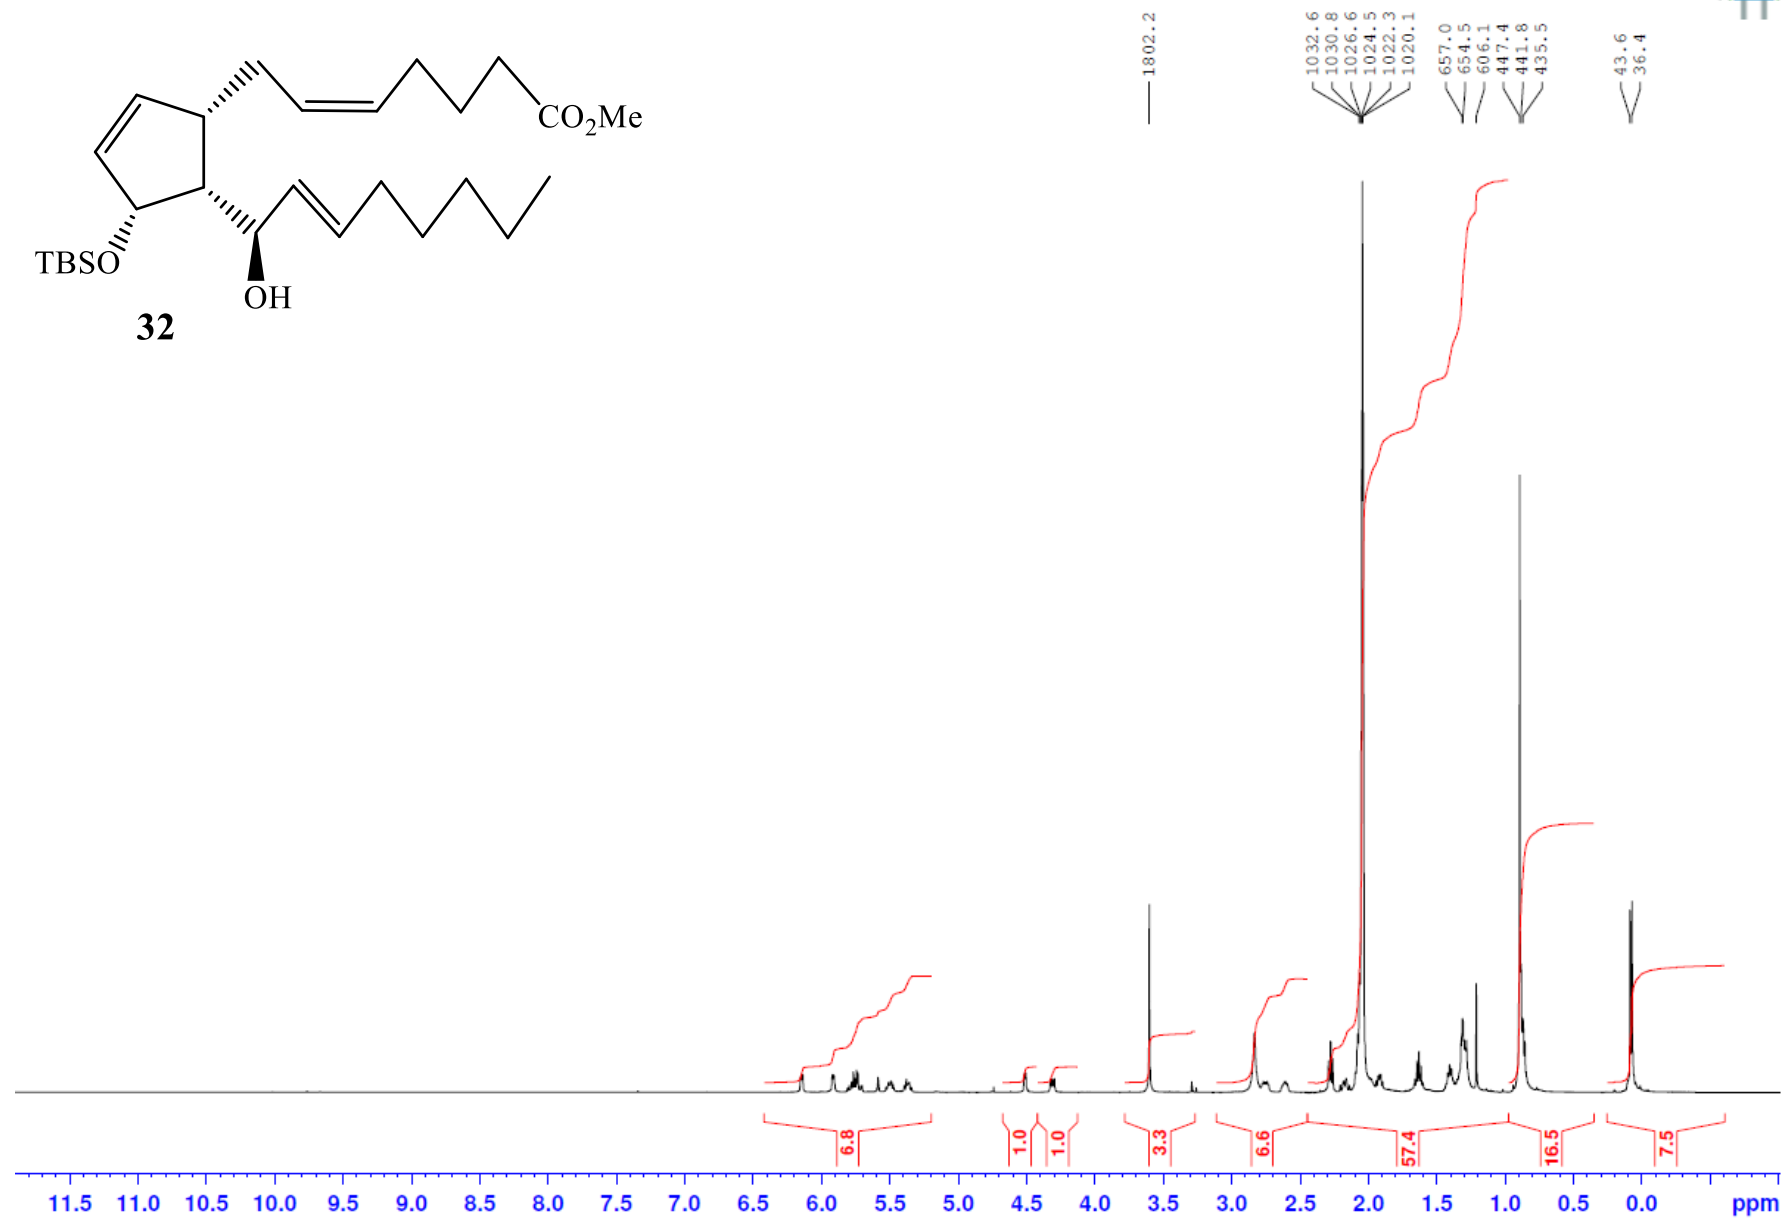

**Figure. S13** <sup>1</sup>H NMR spectrum of **32** (*d*-acetone, 500 MHz)

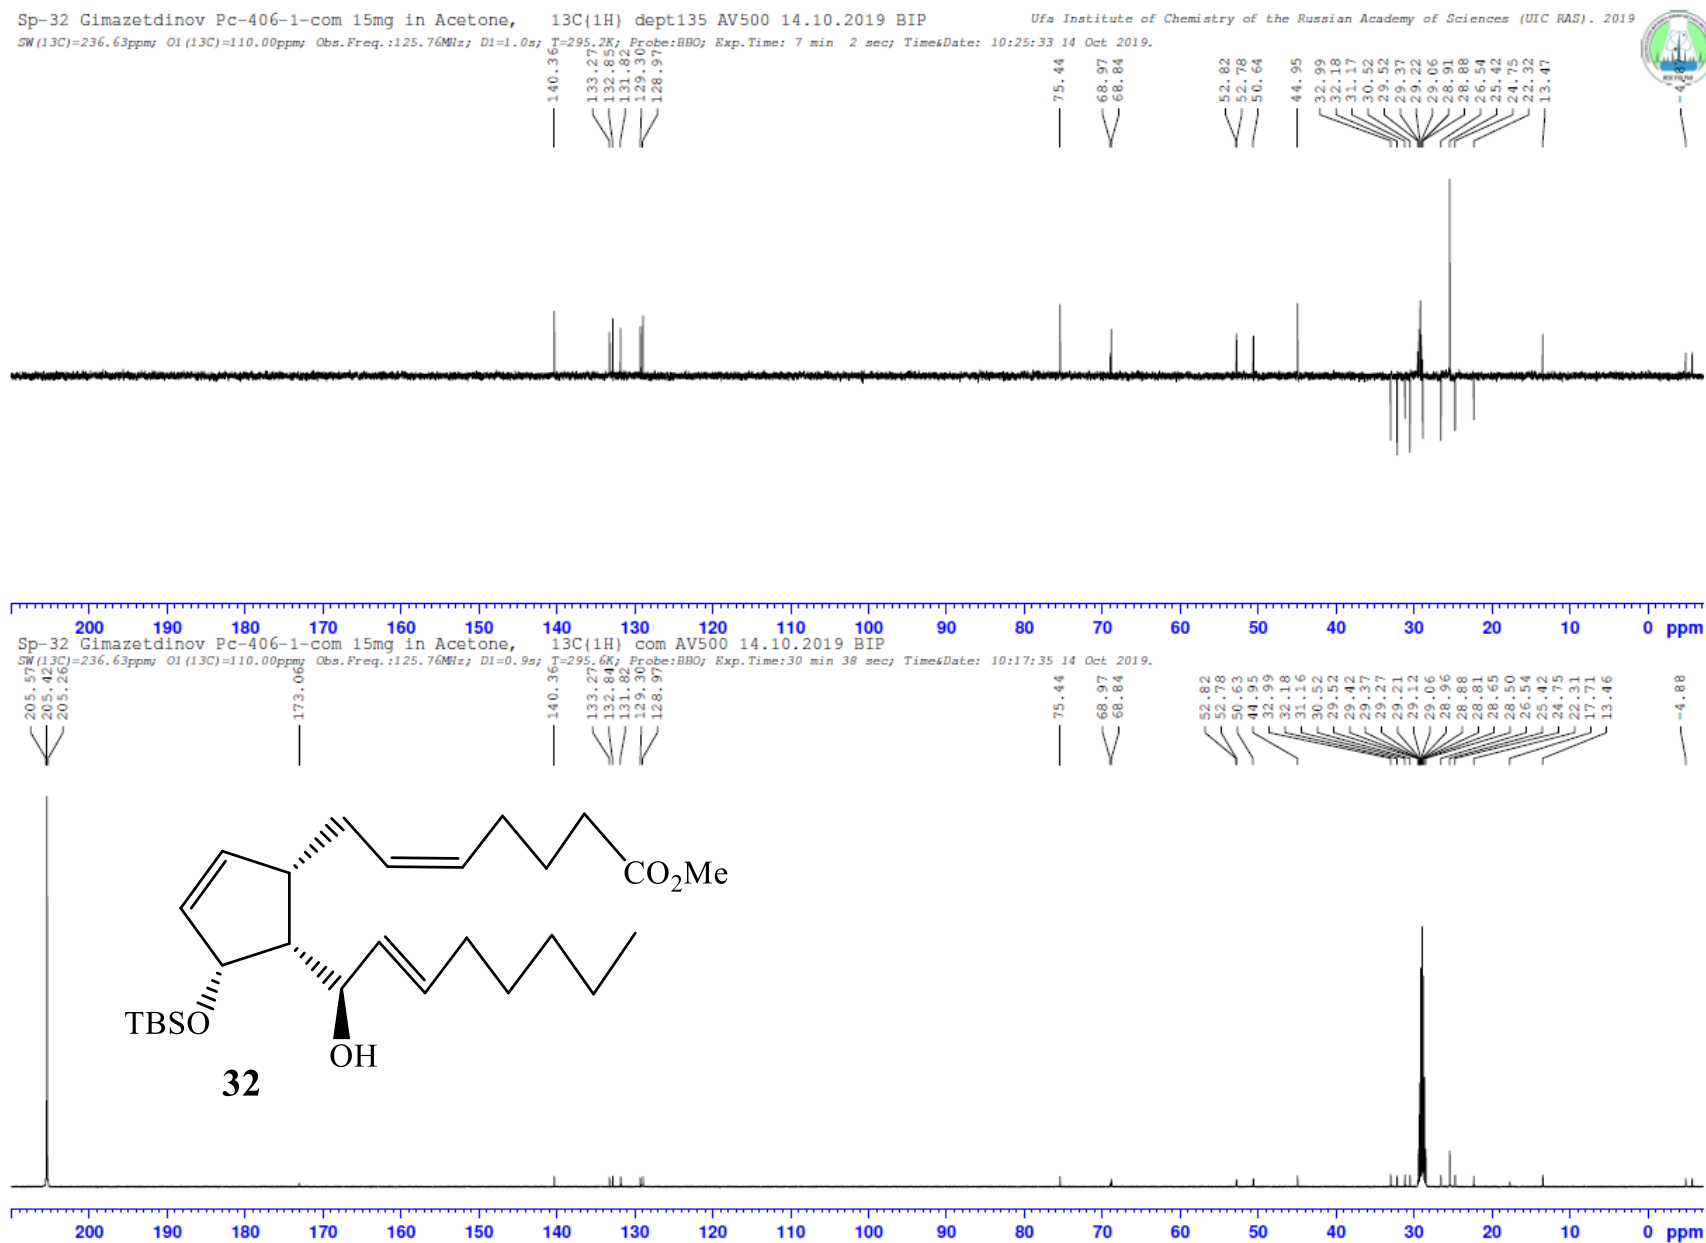

**Figure. S14**  $^{13}\text{C}$  NMR spectrum of **32** (*d*-acetone, 500 MHz)

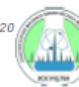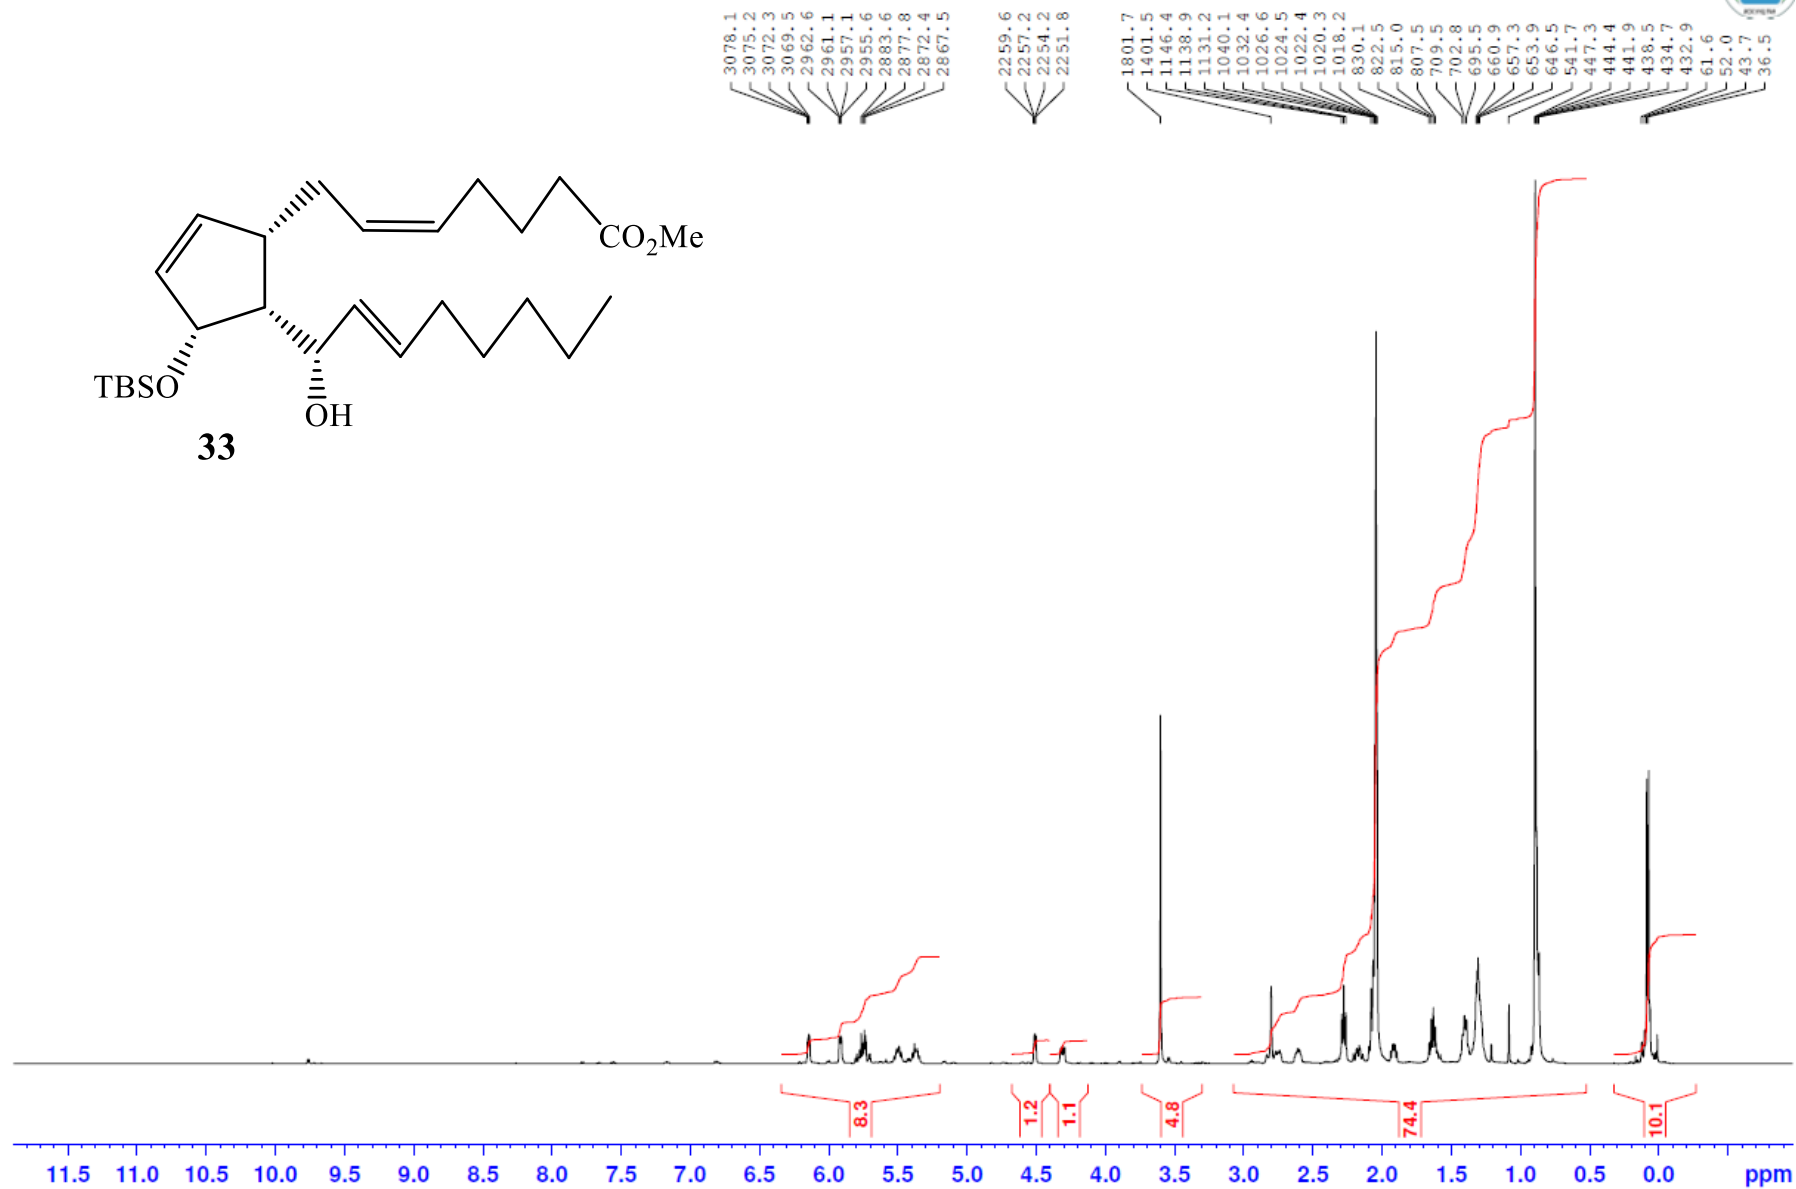

Figure. S15 <sup>1</sup>H NMR spectrum of **33** (*d*-acetone, 500 MHz)

SW(13C)=236.63ppm; O1(13C)=110.00ppm; Obs.Freq.:125.76MHz; D1=1.0s; T=296.7K; Probe:BBO; Exp.Time: 3 min 45 sec; Time&Date: 13:34:41 16 Oct 2020.

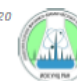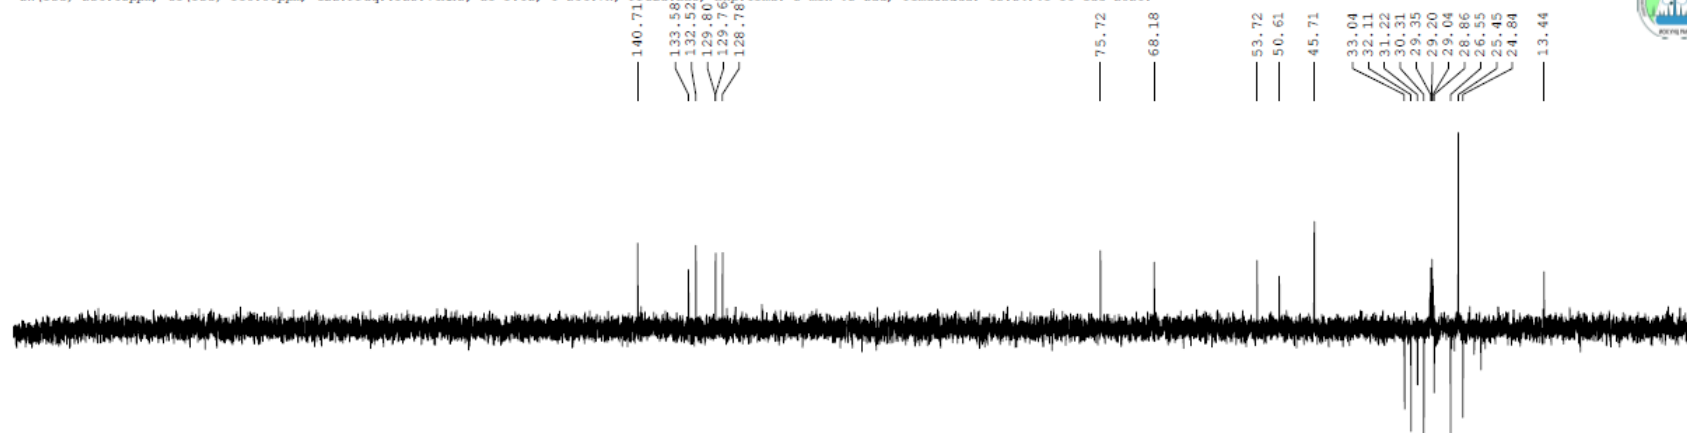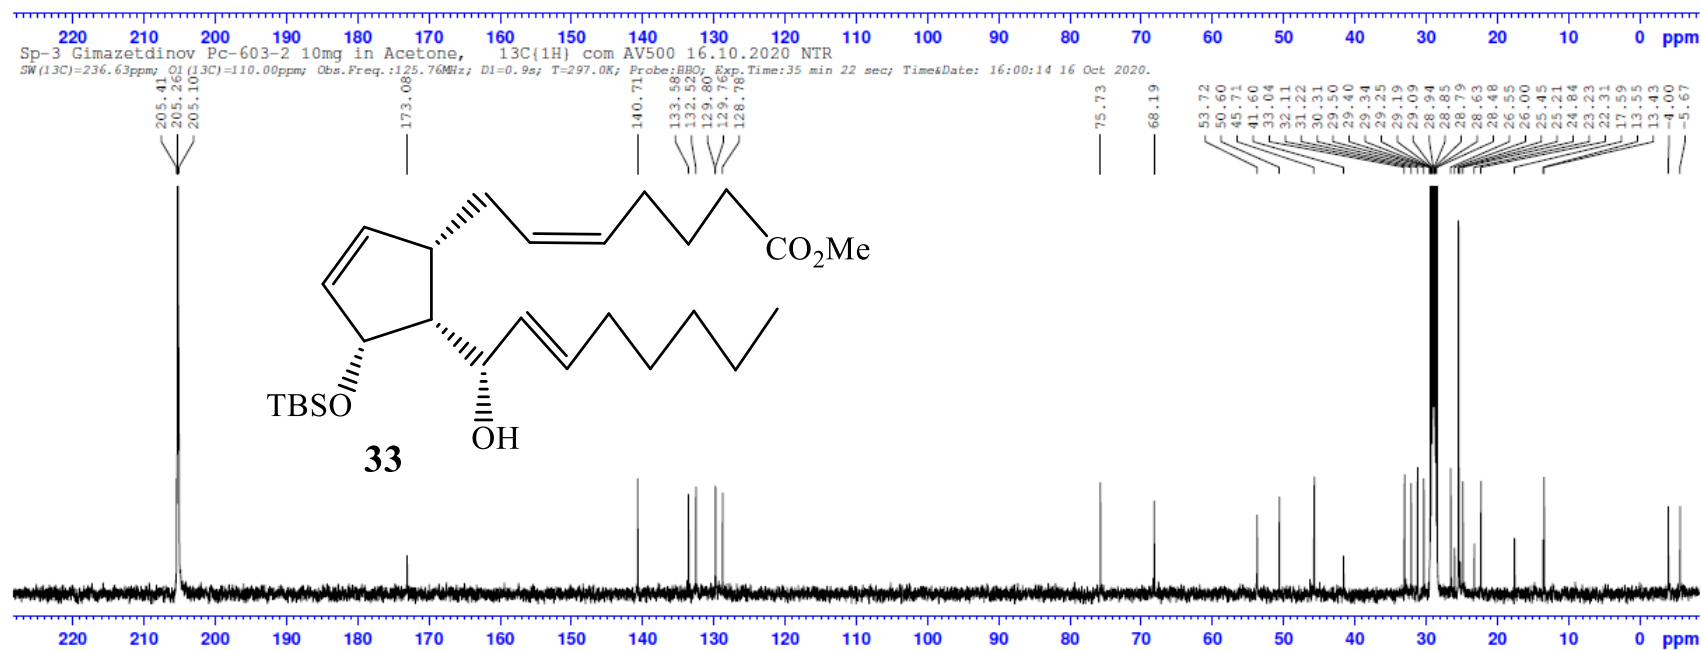

**Figure. S16**  $^{13}\text{C}$  NMR spectrum of **33** (*d*-acetone, 125.77 MHz)

Sp-3 Gimazetdinov Pc-603-2 10mg in Acetone {1H, 1H} NOESY AV500 16.10.2020 NTR  
 SW (1H)-10.39ppm; (1H)-4.86ppm; Obs.Freq.:500.13MHz; D1-1.5s; T-296.2K; Probe:BBO; Exp.Time: 1 h 24 min 12 sec; Time&Date: 13:49:11 16 Oct 2020.

Ufa Institute of Chemistry of the Russian Academy of Sciences (UIC RAS). 202

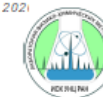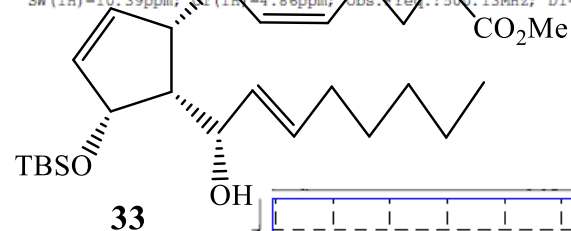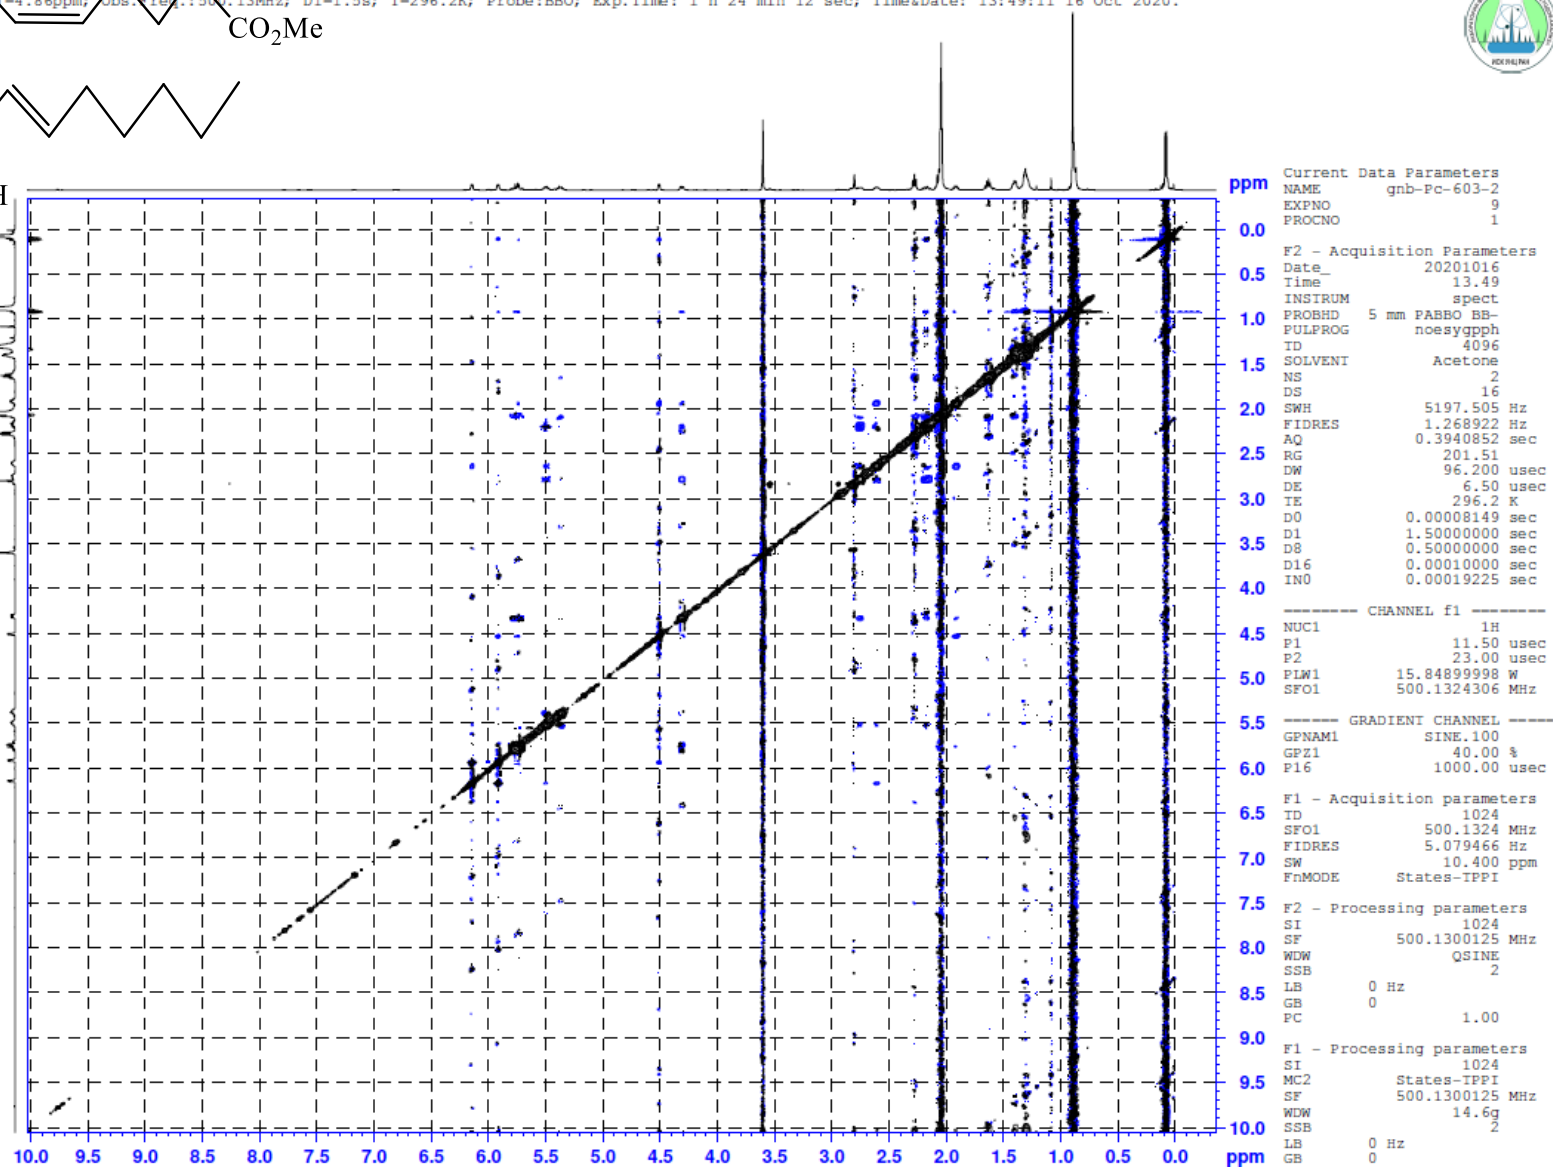

**Figure. S17** {<sup>1</sup>H, <sup>1</sup>H} NOESY spectrum of **33** (*d*-acetone, 125.77 MHz)

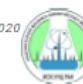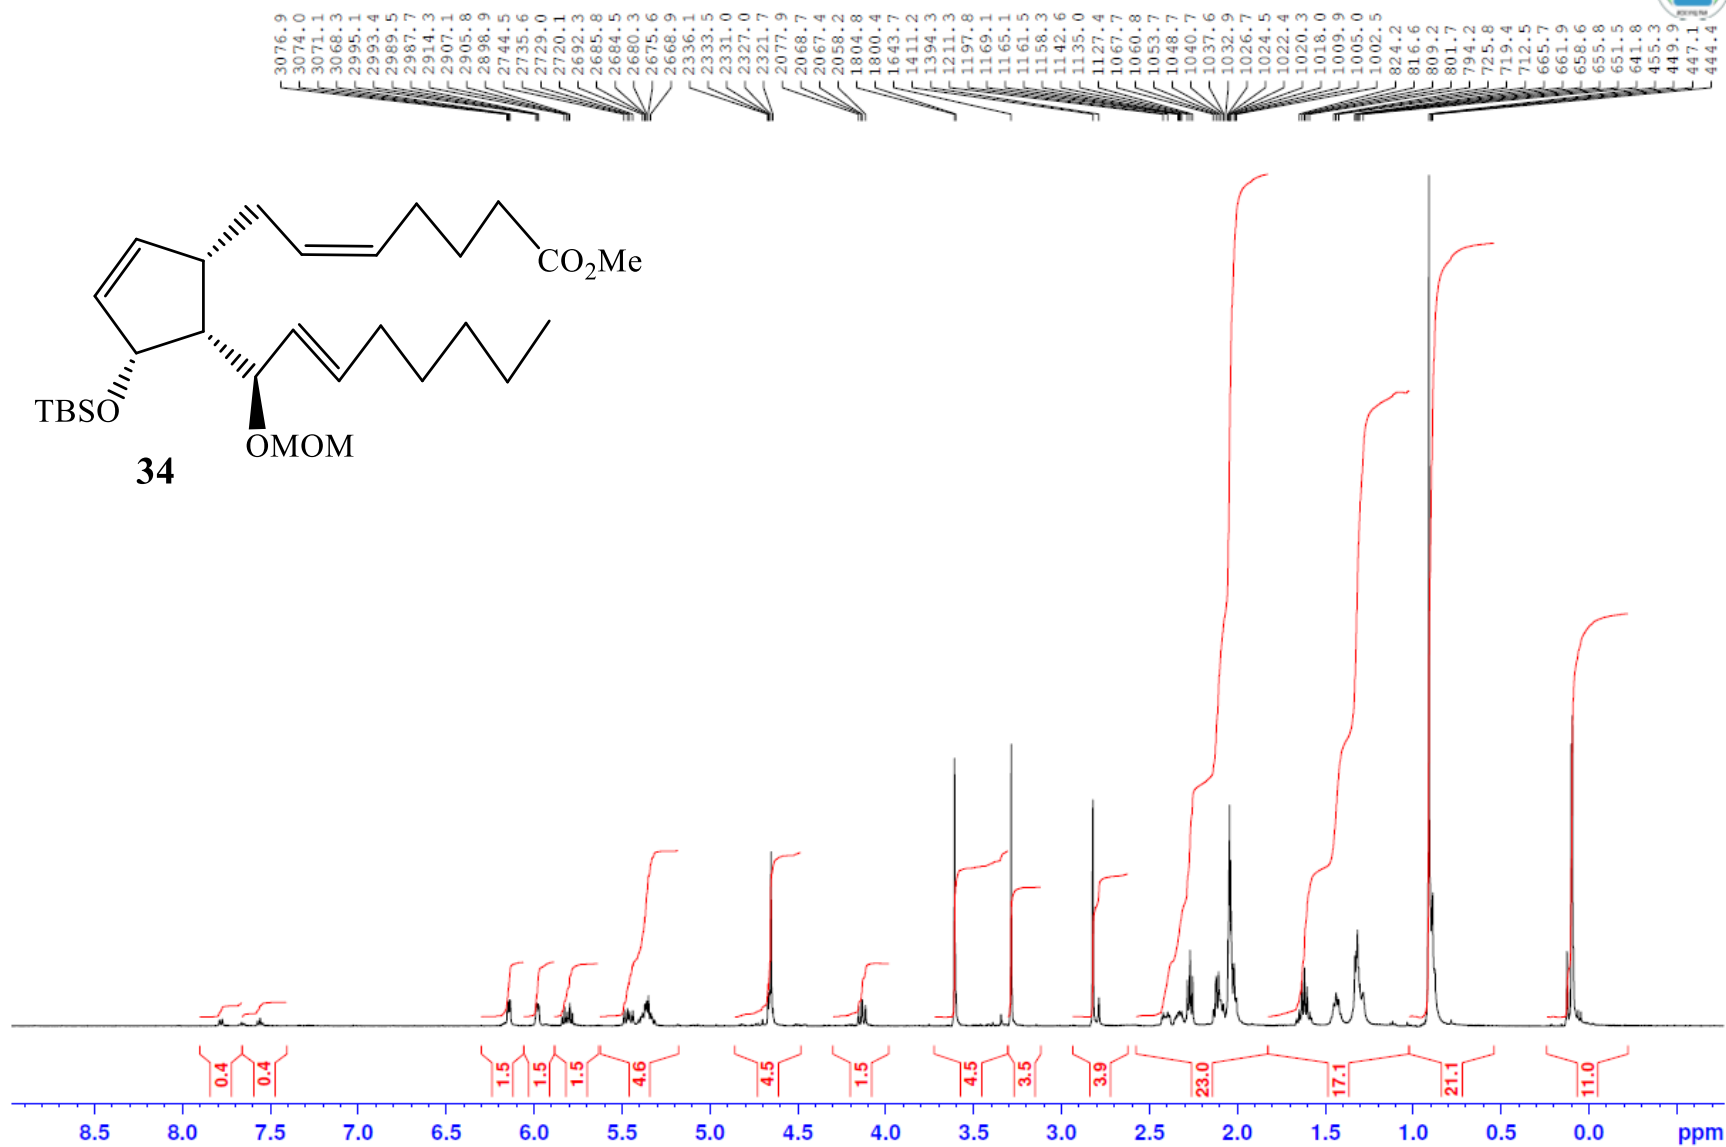

Figure. S18 <sup>1</sup>H NMR spectrum of **34** (d-acetone, 500 MHz)

Sp-800 Gimazetdinov Pc-604-com 10mg in Acetone,  $^{13}\text{C}\{^1\text{H}\}$  com AV500 15.10.2020 SSH

Ufa Institute of Chemistry of the Russian Academy of Sciences (UIC RAS). 2020

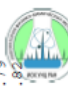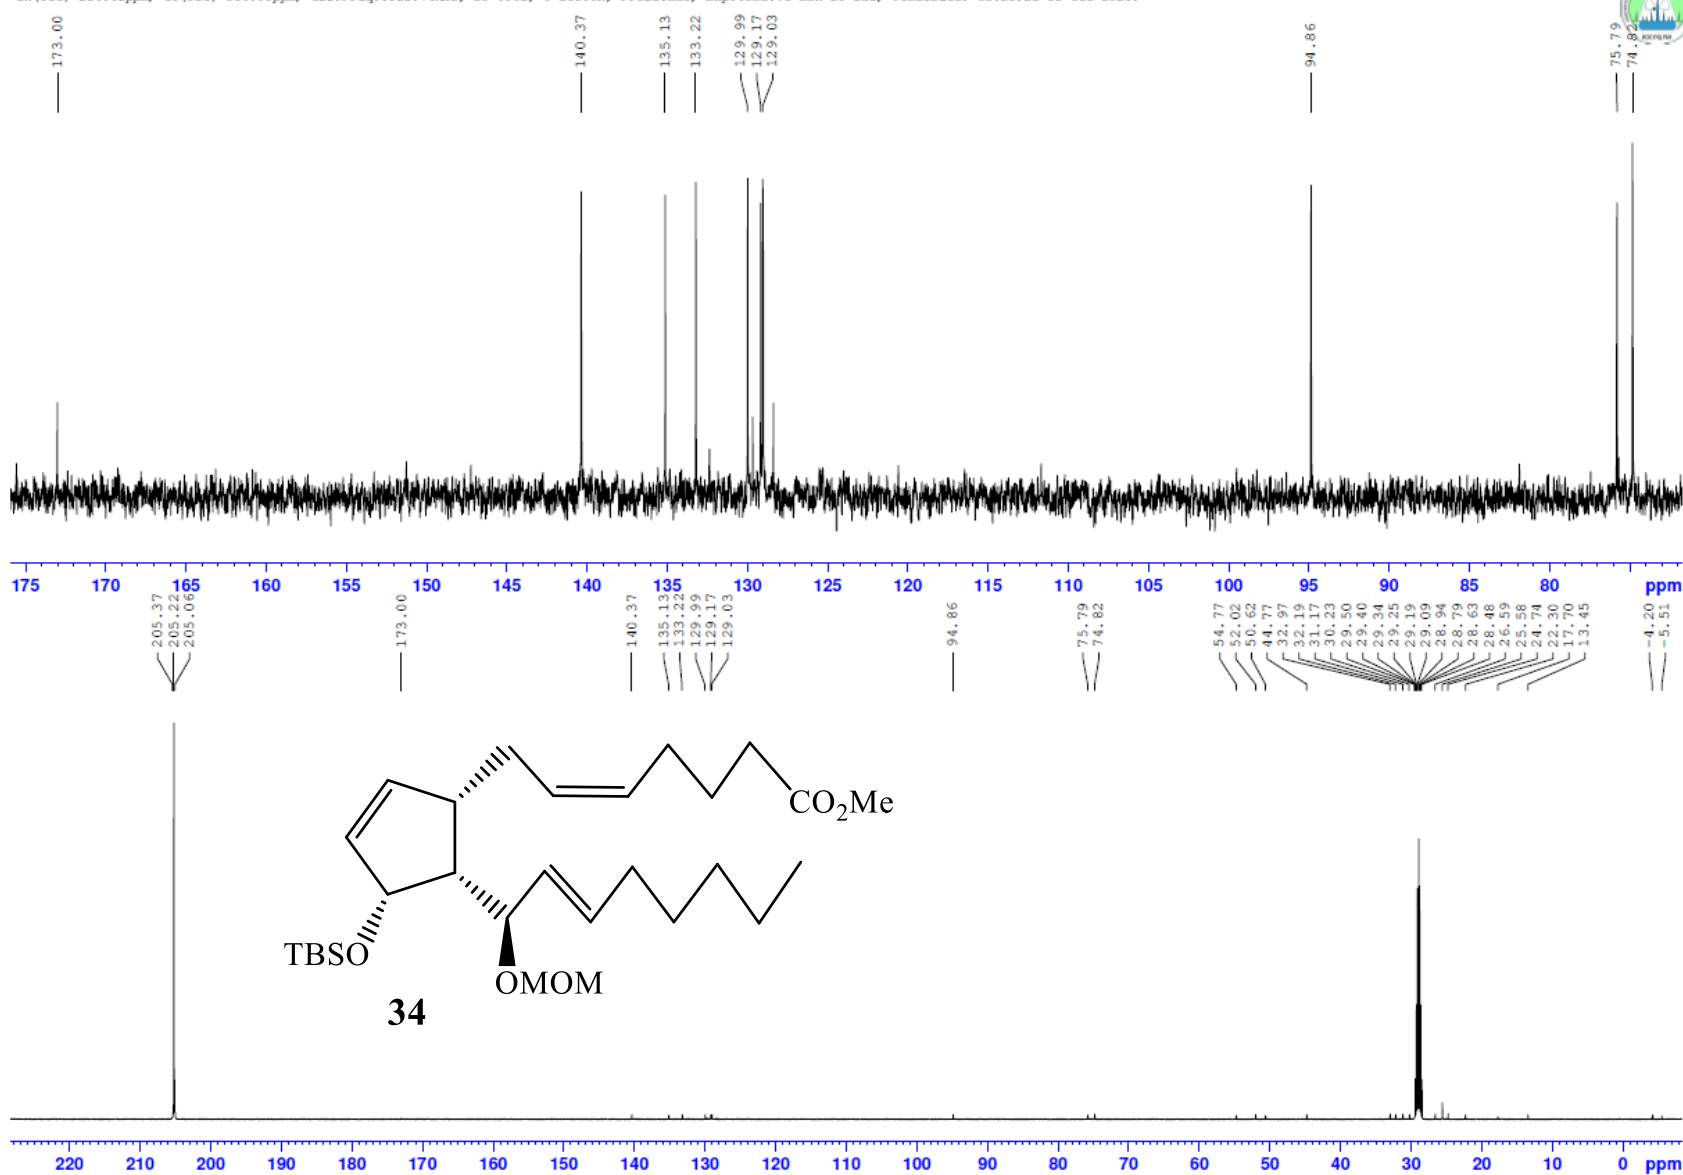

Figure. S19  $^{13}\text{C}$  NMR spectrum of **34** (d-acetone, 125.77 MHz)

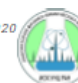

SW (1H)=19.99ppm O1 (1H)=7.00ppm Obs.Freq.:500.13MHz; D1=2.0s; T=0.0K; Probe:BBO; Exp.Time: 7 sec; TimesDate: 14:16:07 20 Oct 2020.

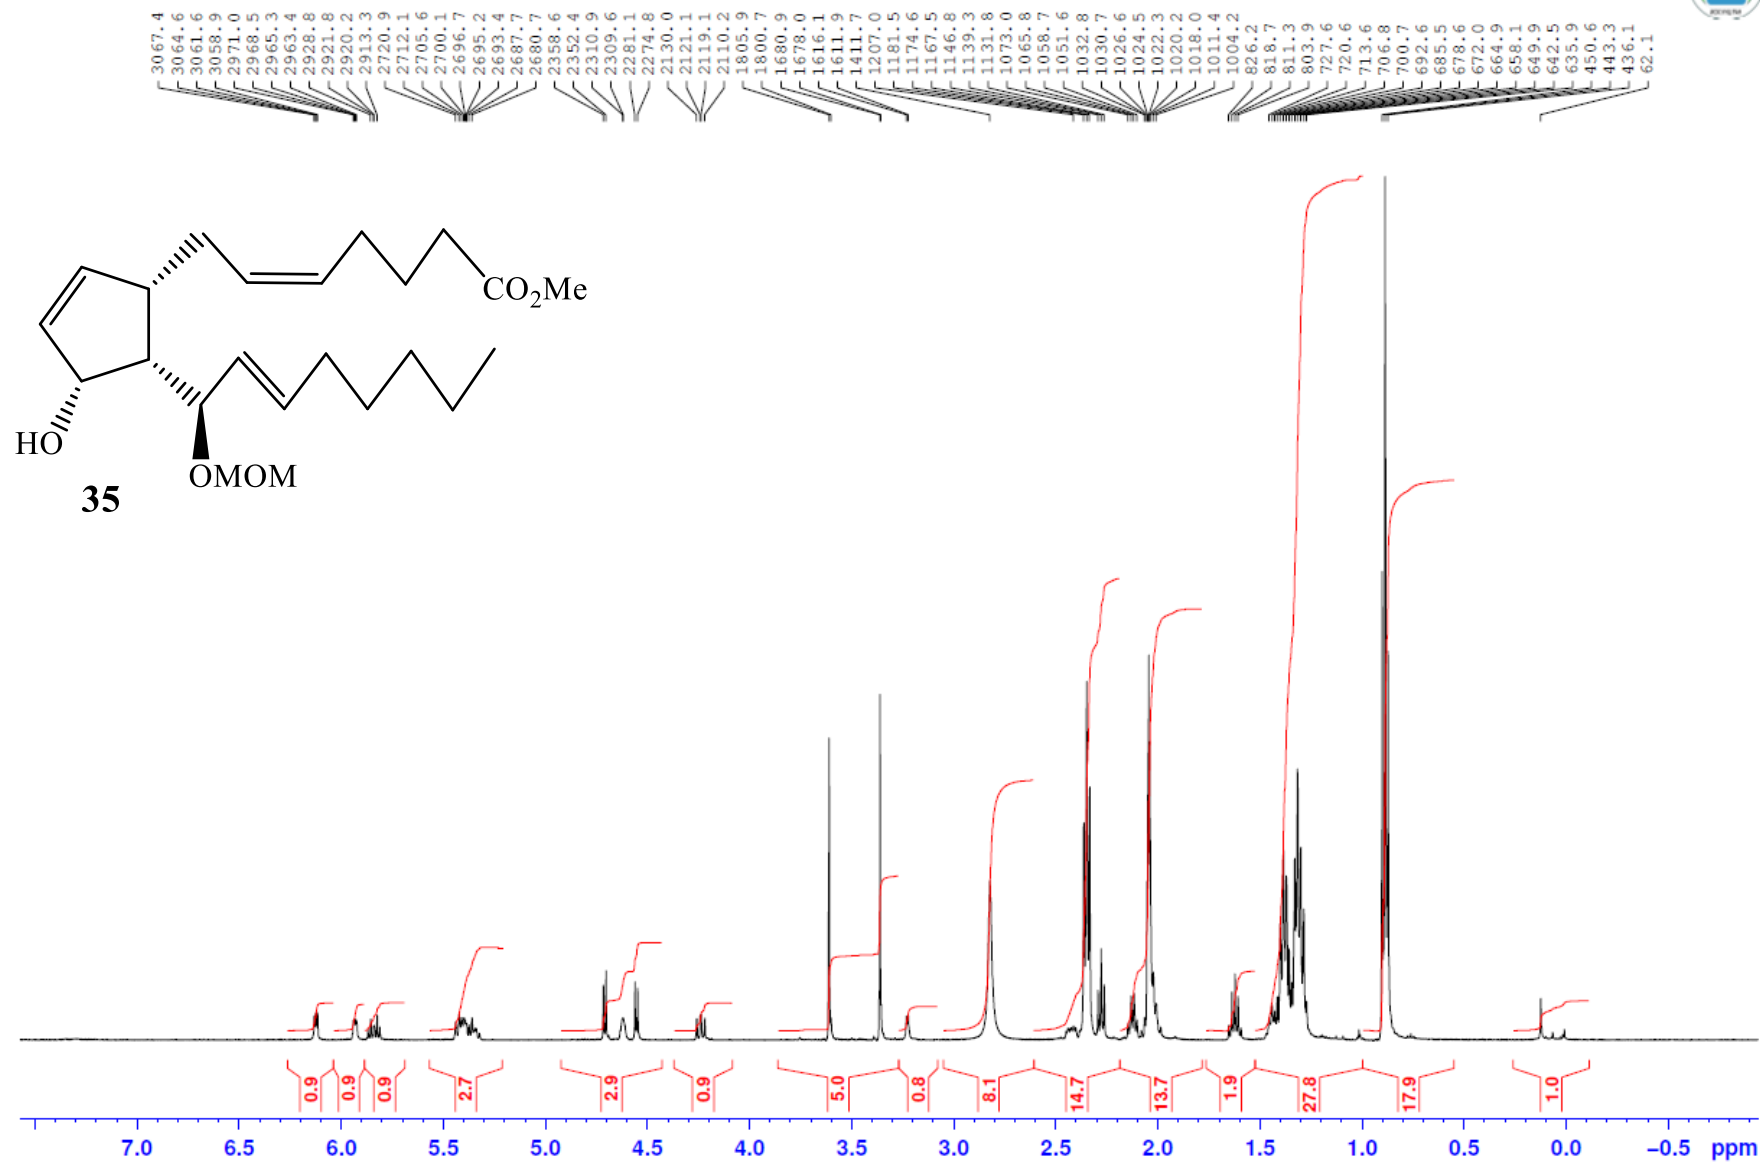

**Figure. S20** <sup>1</sup>H NMR spectrum of **35** (d-acetone, 500 MHz)

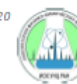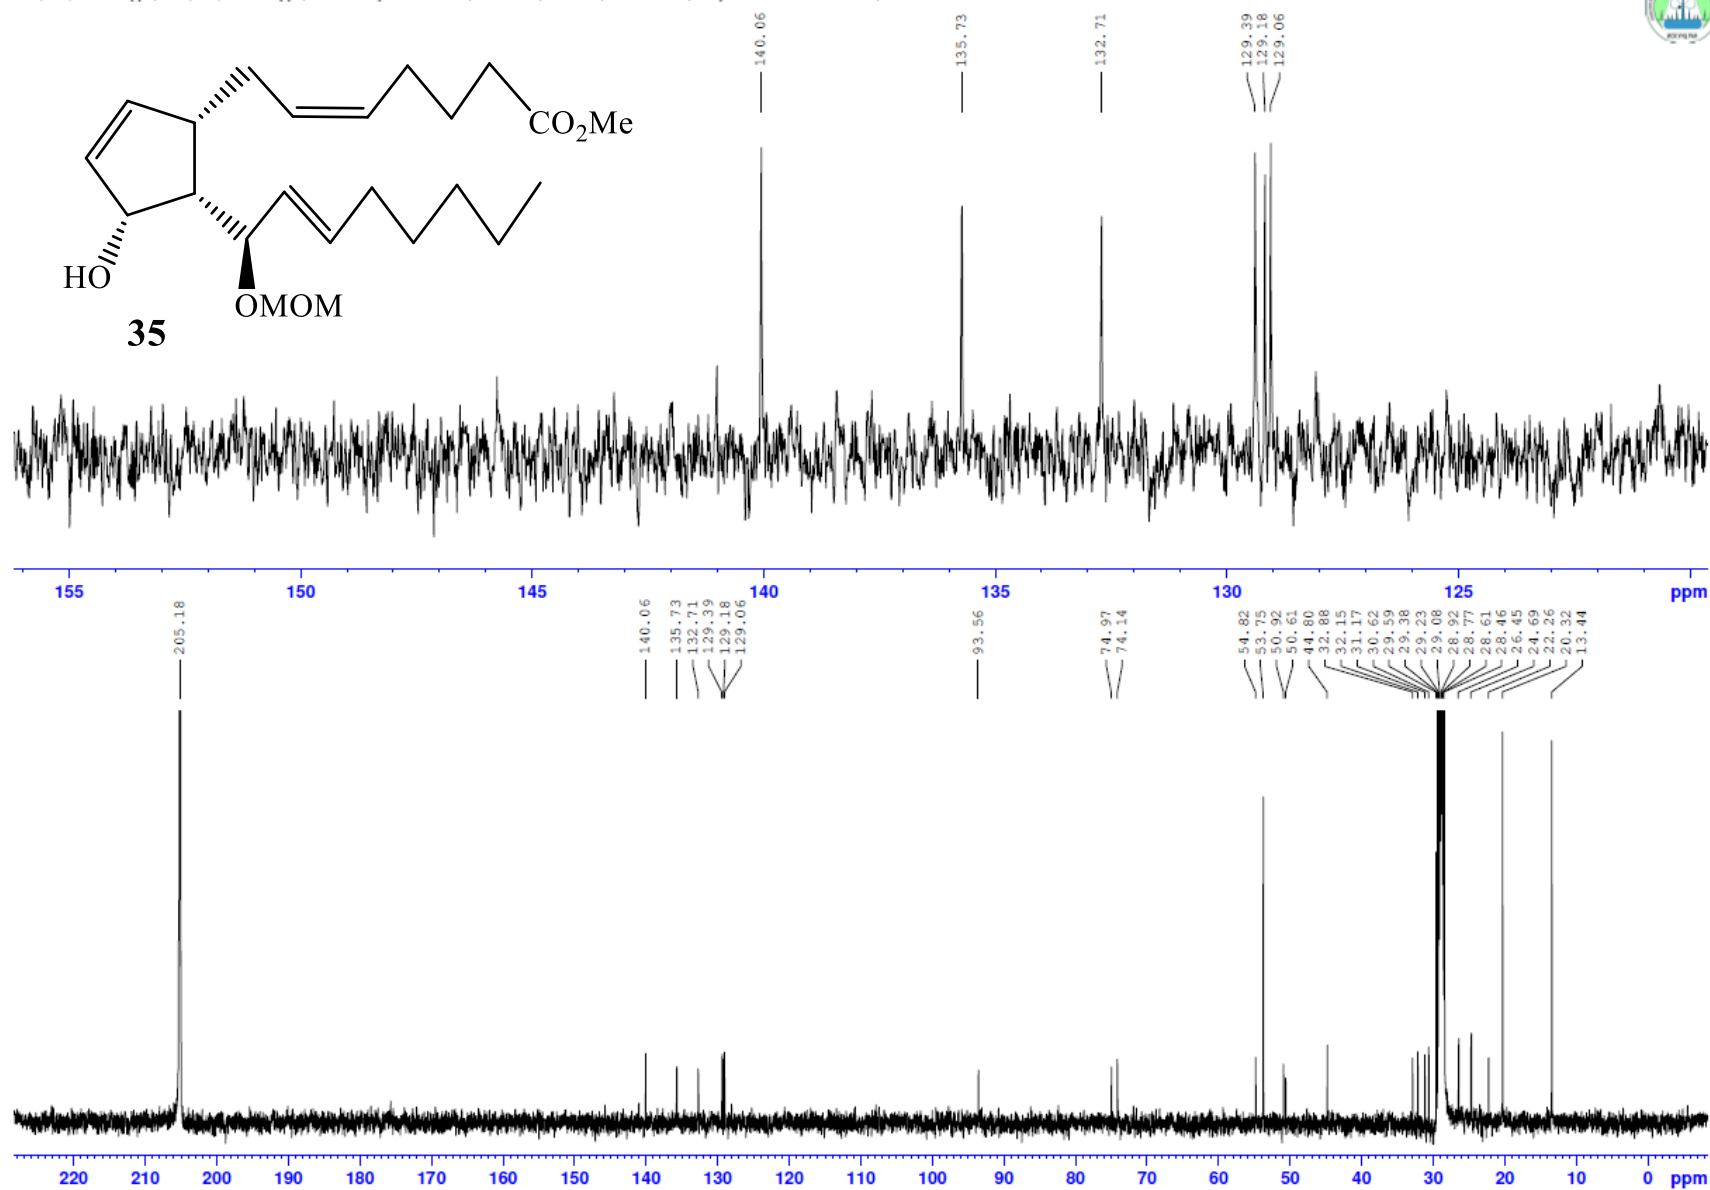

**Figure. S21**  $^{13}\text{C}$  NMR spectrum of **35** (*d*-acetone, 125.77 MHz)

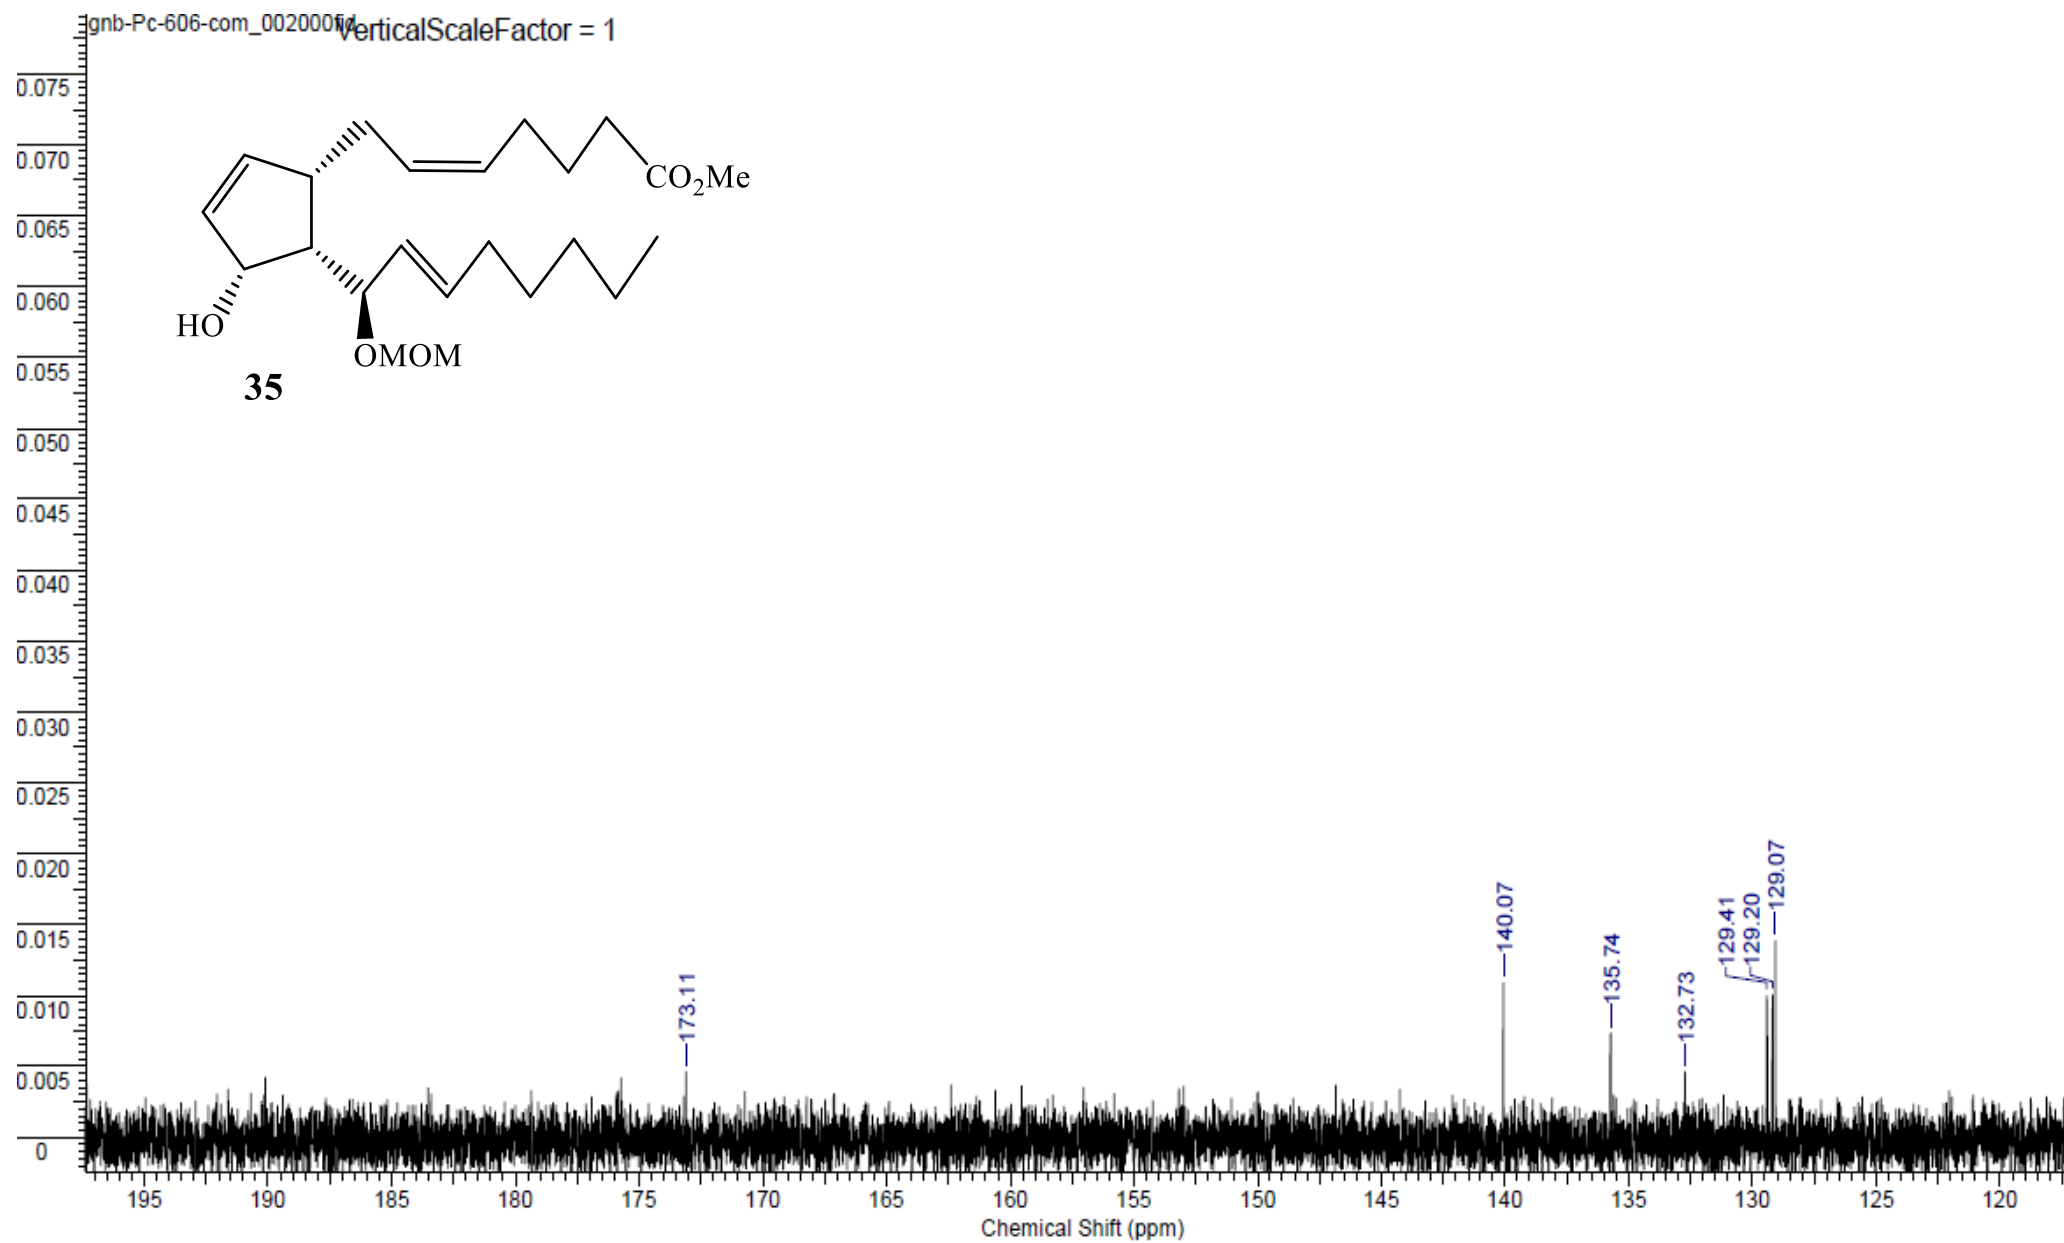

**Figure. S22** <sup>13</sup>C NMR spectrum of **35** (*d*-acetone, 125.77 MHz)

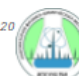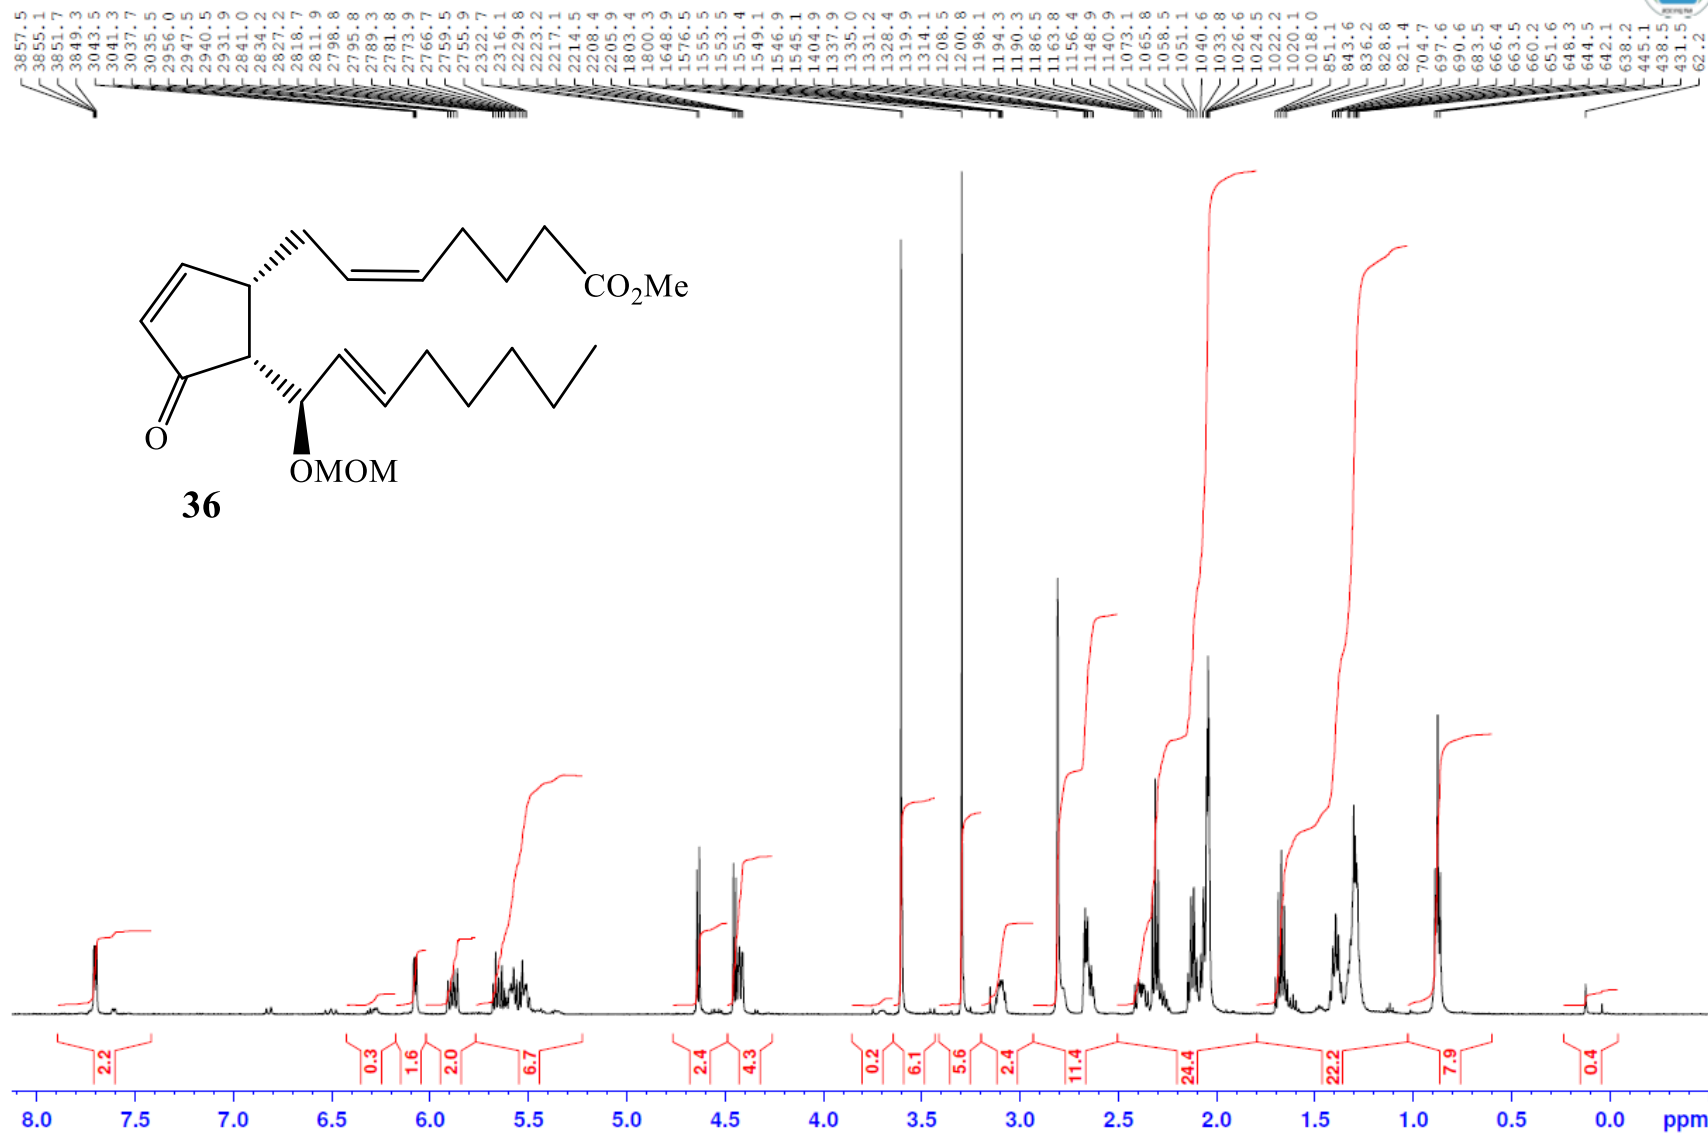

Figure. S23 <sup>1</sup>H NMR spectrum of **36** (d-acetone, 500 MHz)

|                        |                                                  |                      |                                                                                                           |                        |                 |
|------------------------|--------------------------------------------------|----------------------|-----------------------------------------------------------------------------------------------------------|------------------------|-----------------|
| Acquisition Time (sec) | 1.1010                                           | Comment              | Sp-924 Gimazetdinov Pc-608-com 10mg in Acetone. <sup>13</sup> C{ <sup>1</sup> H} com AV500 02.11.2020 BIP |                        |                 |
| Date                   | 02 Nov 2020 11:14:08                             | Date Stamp           | 02 Nov 2020 11:14:08                                                                                      |                        |                 |
| File Name              | E:\текучее\gnb-Pc-608-com\gnb-Pc-608-com_002001r | Frequency (MHz)      | 125.76                                                                                                    | Nucleus                | <sup>13</sup> C |
| Number of Transients   | 398                                              | Origin               | spect                                                                                                     | Original Points Count  | 32768           |
| Points Count           | 32768                                            | Pulse Sequence       | zgpg30                                                                                                    | Receiver Gain          | 201.51          |
| Solvent                | Acetone                                          | Spectrum Offset (Hz) | 13833.3623                                                                                                | SW(cyclical) (Hz)      | 29761.90        |
|                        |                                                  | Sweep Width (Hz)     | 29761.00                                                                                                  | Temperature (degree C) | 25.534          |

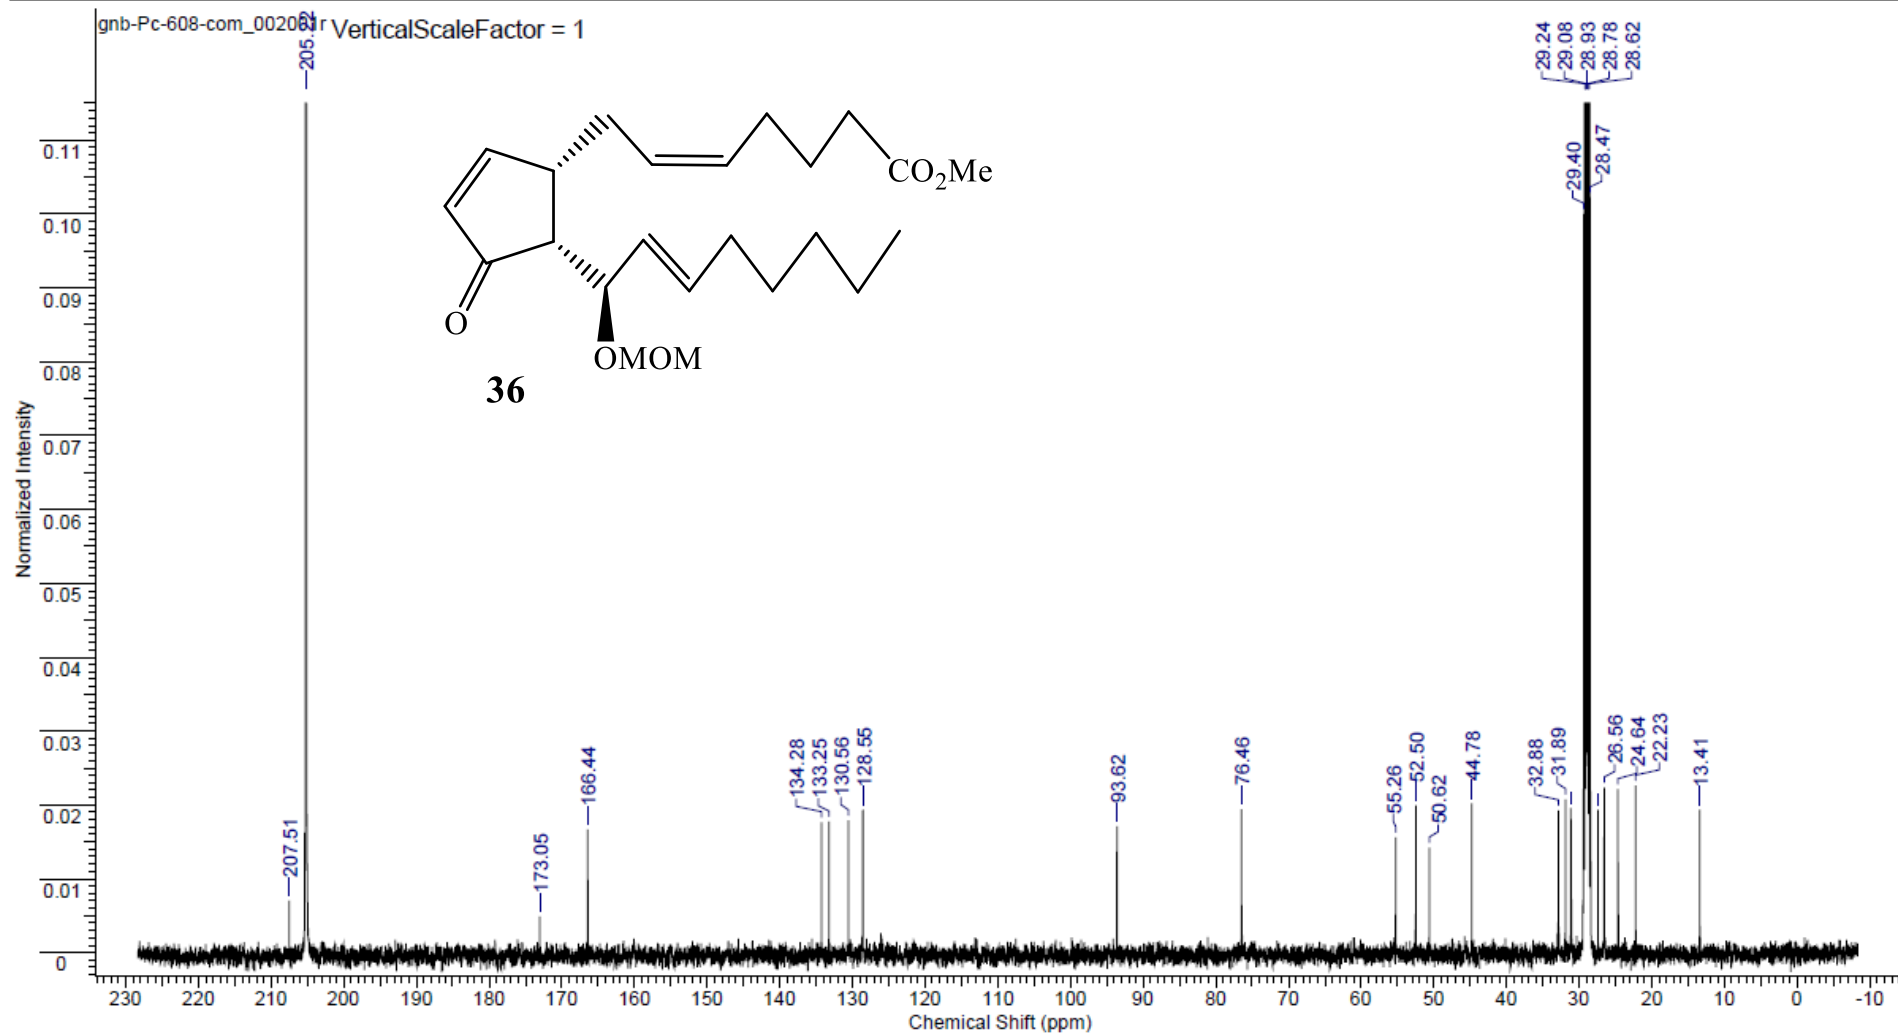

Figure. S24 <sup>13</sup>C NMR spectrum of **36** (*d*-acetone, 125.77 MHz)

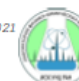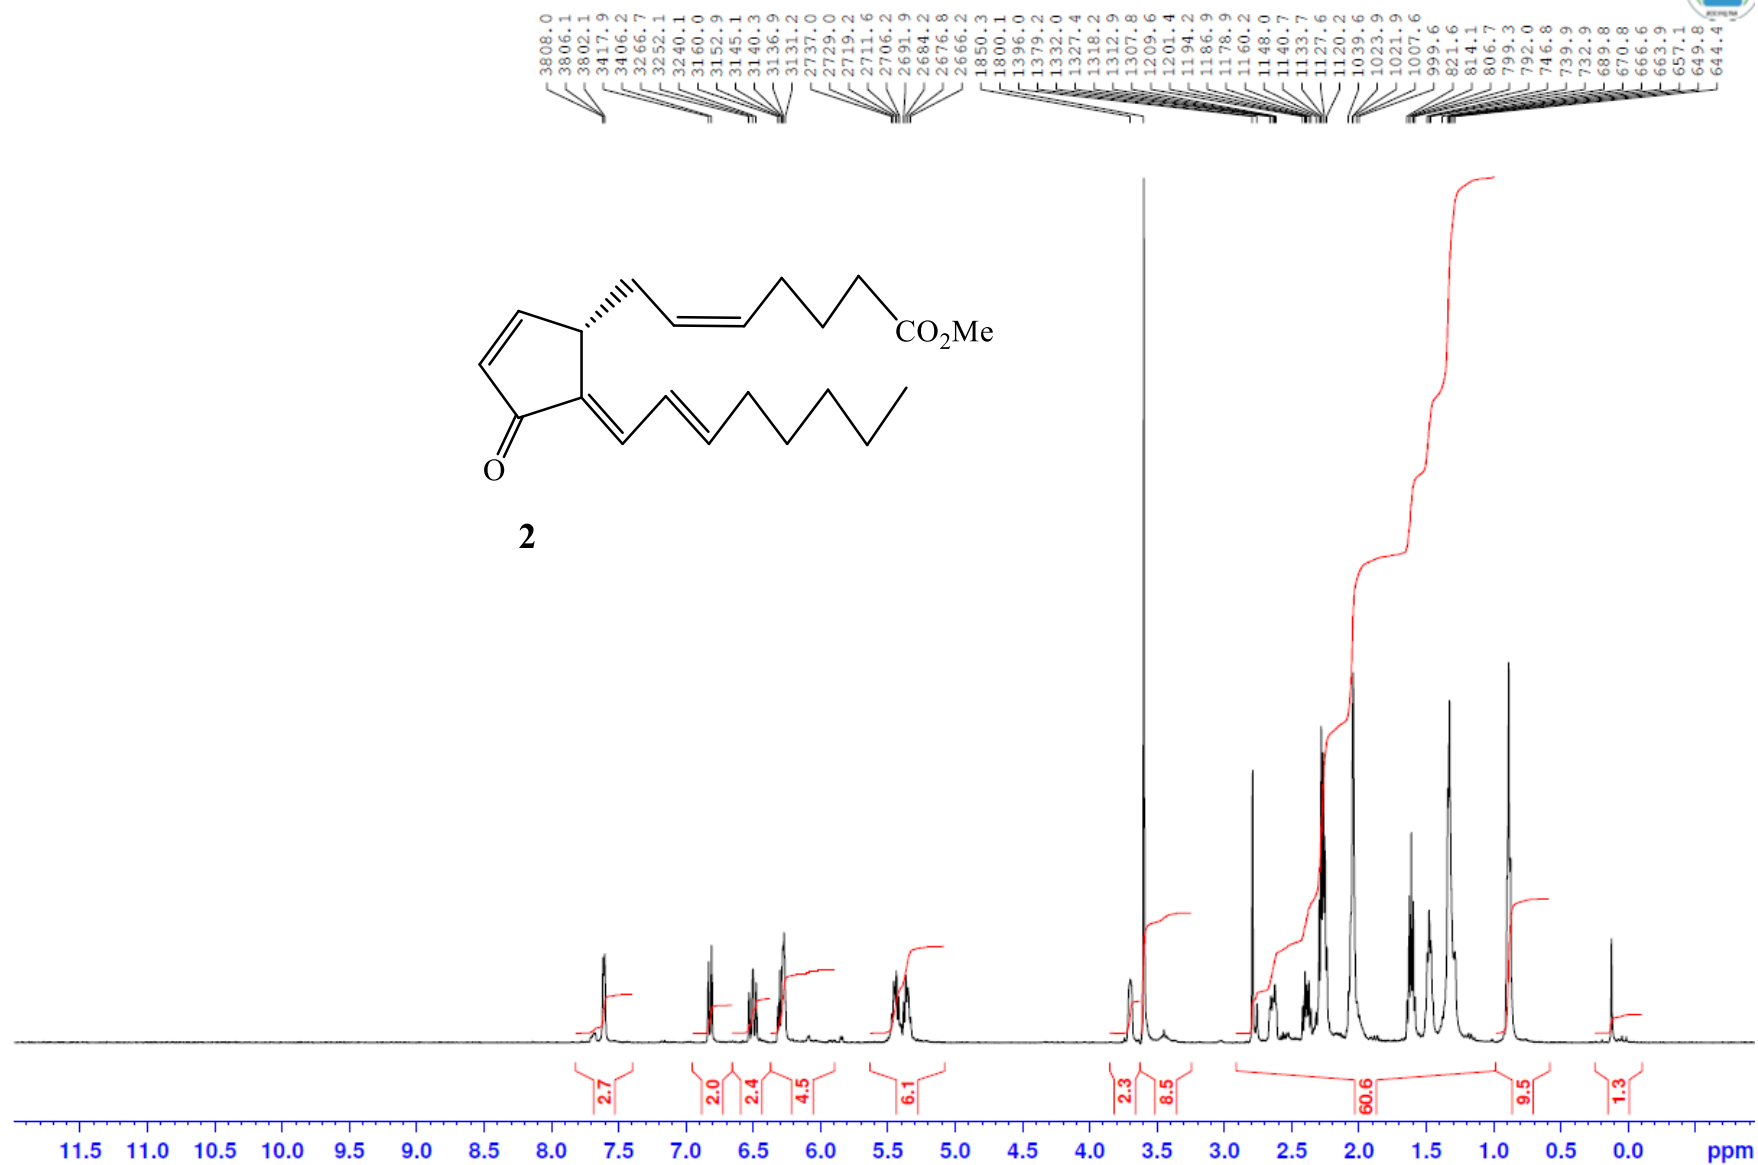

Figure. S25 <sup>1</sup>H NMR spectrum of **2** (d-acetone, 500 MHz)

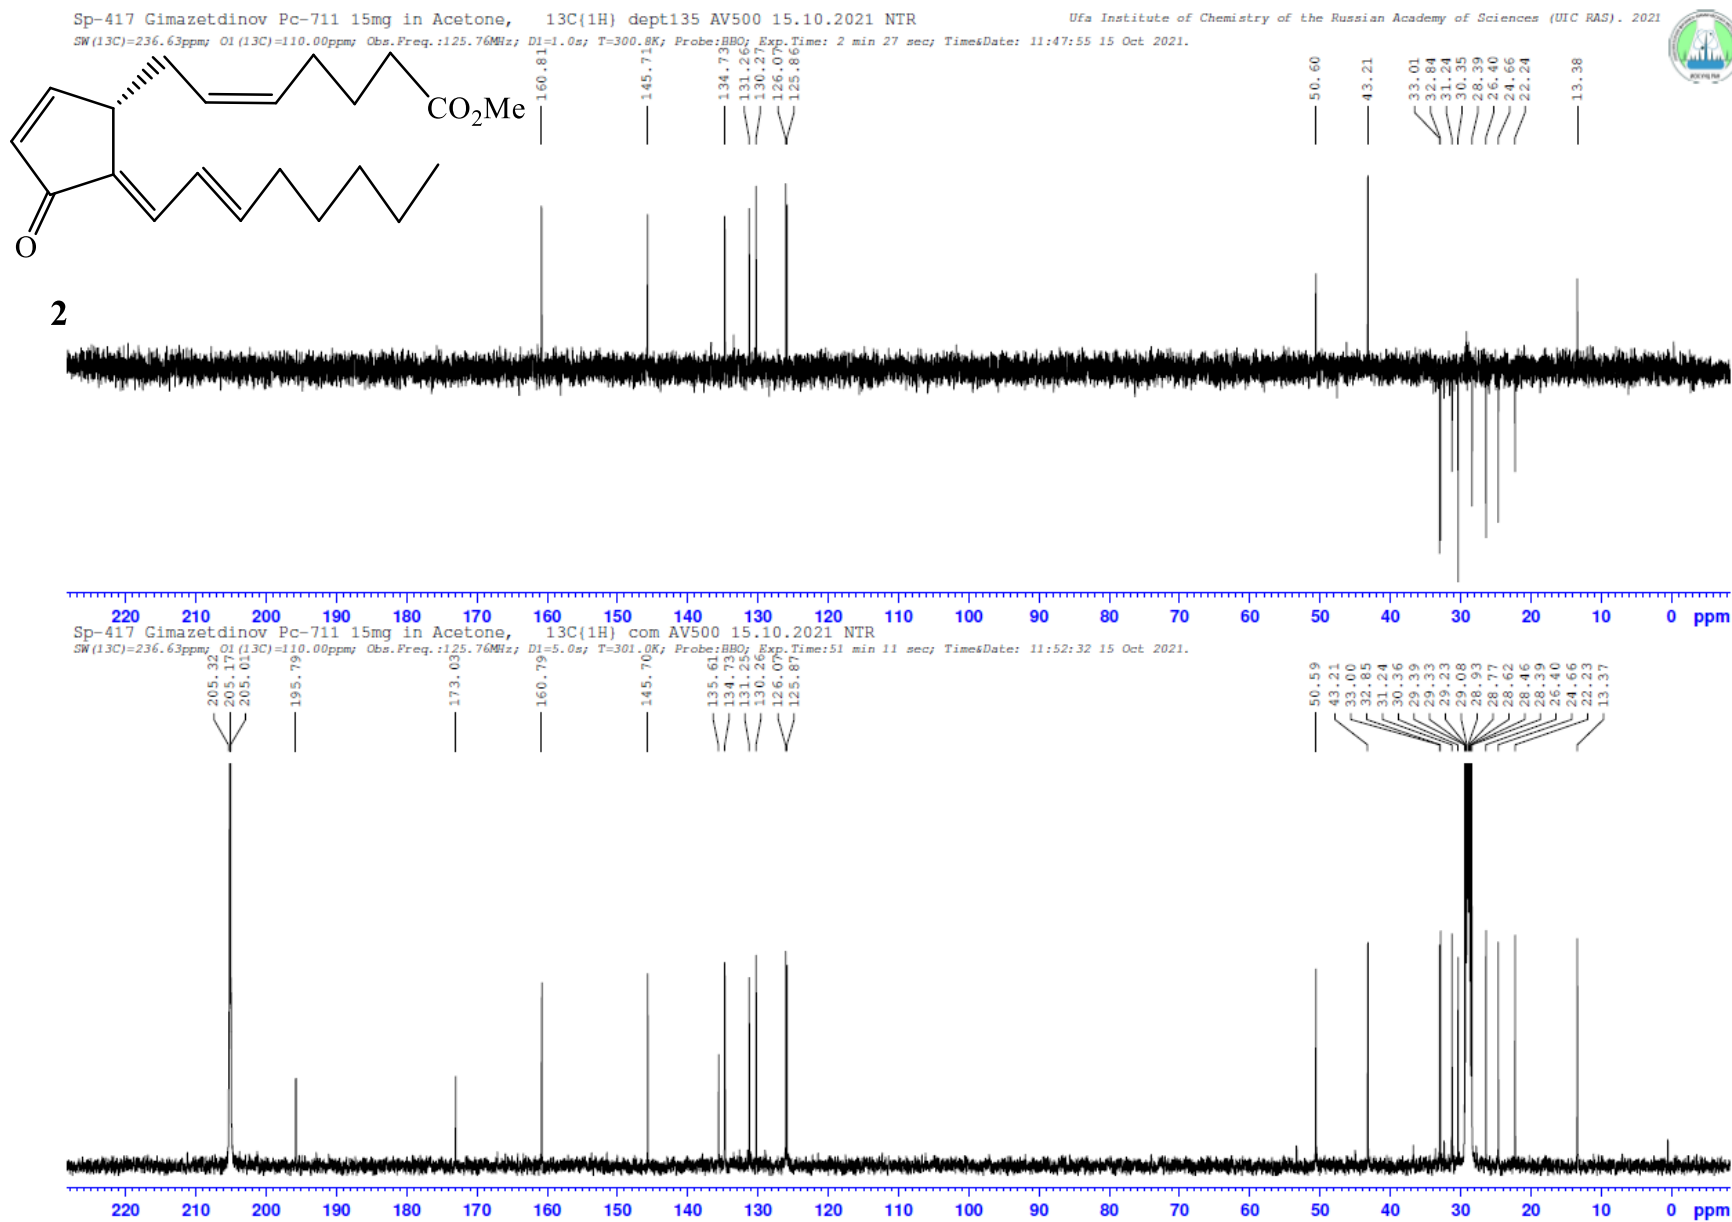

Figure. S26  $^{13}\text{C}$  NMR spectrum of **2** (*d*-acetone, 125.77 MHz)
